# Human mobility at Tell Atchana (Alalakh) during the 2nd millennium BC:

## integration of isotopic and genomic evidence

Short Title: Human mobility at Tell Atchana (Alalakh)

Tara Ingman<sup>1\*¶</sup>, Stefanie Eisenmann<sup>2\*¶</sup>, Eirini Skourtanioti<sup>2</sup>, Murat Akar<sup>3</sup>, Jana Ilgner<sup>4</sup>,  
Guido Alberto Gnechi Ruscone<sup>2</sup>, Petrus le Roux<sup>5</sup>, Rula Shafiq<sup>6</sup>, Gunnar U. Neumann<sup>2</sup>,  
Marcel Keller<sup>7</sup>, Căcilia Freund<sup>2</sup>, Sara Marzo<sup>4</sup>, Mary Lucas<sup>4</sup>, Johannes Krause<sup>2,8</sup>, Patrick  
Roberts<sup>4</sup>, K. Aslıhan Yener<sup>9\*</sup>, Philipp W. Stockhammer<sup>2,10\*</sup>

<sup>1</sup>Koç University Research Center for Anatolian Civilizations (ANAMED), Istanbul 34433,  
Turkey

<sup>2</sup>Department of Archaeogenetics, Max Planck Institute for the Science of Human History,  
Jena 07745, Germany

<sup>3</sup>Department of Archaeology, Mustafa Kemal University, Alahan-Antakya, Hatay 31060,  
Turkey

<sup>4</sup>Department of Archaeology, Max Planck Institute for the Science of Human History, Jena  
07745, Germany

<sup>5</sup>Department of Geological Sciences, University of Cape Town, Rondebosch 7700, South  
Africa

<sup>6</sup>Anthropology Department, Yeditepe University, Istanbul 34755, Turkey

<sup>7</sup>Estonian Biocentre, Institute of Genomics, University of Tartu, Tartu 51010, Estonia

<sup>8</sup>Max Planck Institute for Evolutionary Anthropology, Deutscher Platz 6, Leipzig 04103, Germany

<sup>9</sup>Institute for the Study of the Ancient World (ISAW), New York University, New York, NY 10028, USA

<sup>10</sup>Institute for Pre- and Protohistoric Archaeology and Archaeology of the Roman Provinces, Ludwig Maximilians University, Munich 80539, Germany

\* Corresponding author

Email: [tara.ingman@gmail.com](mailto:tara.ingman@gmail.com); [eisenmann@shh.mpg.de](mailto:eisenmann@shh.mpg.de); [akyener12@gmail.com](mailto:akyener12@gmail.com); [philipp.stockhammer@lmu.de](mailto:philipp.stockhammer@lmu.de)

<sup>¶</sup> These authors contributed equally to this work.

## Abstract

The Middle and Late Bronze Age Near East, a period roughly spanning the second millennium BC (ca. 2000-1200 BC), is frequently referred to as the first ‘international age’, characterized by intense and far-reaching contacts between different entities from the eastern Mediterranean to the Near East and beyond. In a large-scale tandem study of stable isotopes and ancient DNA of individuals excavated at Tell Atchana (Alalakh), situated in the northern Levant, we explore the role of mobility at the capital of a regional kingdom. We generated strontium isotope data for 53 individuals, oxygen isotope data for 77 individuals, and added ancient DNA data from 9 new individuals to a recently published dataset of 28 individuals. A dataset like this, from a single site in the Near East, is thus far unparalleled in terms of both its breadth and depth, providing the opportunity to simultaneously obtain an in-depth view of individual mobility and also broader demographic insights into the resident population. The DNA data reveals a very homogeneous gene pool, with only one outlier. This picture of an overwhelmingly local ancestry is consistent with the evidence of local upbringing in most of the individuals indicated by the isotopic data, where only five were found to be ‘non-local’. High levels of contact, trade, and exchange of ideas and goods in the Middle and Late Bronze Ages, therefore, seem not to have translated into high levels of individual mobility detectable at Tell Atchana.

## Introduction

The identification of human mobility, both of groups and of individuals, has been, and remains, a topic of much discussion within archaeology. The Near East during the second millennium BC is a particularly promising arena to explore many of the questions targeting mobility patterns and effects, as it has often been discussed as an era of high levels of international connectivity in areas such as trade, diplomacy, and artistic expression,

documented by both the material and textual records [1-8]. The wide-ranging social, cultural, and economic contacts of this period have long been understood to involve high levels of individual mobility on a broad scale and across a wide area, as the exchange and movement of traders, artisans, and representatives of kings is well-documented [9-13]. However, there have been limited direct studies of life history and broader demographic trends during this time period, particularly in the Levant (where much of the isotopic work done on humans has been in later periods [14-20]), limiting the degree to which this can be effectively tested, although isotopic work done in second millennium BC contexts in Egypt [21, 22], Crete [23, 24], Greece [25, 26], Anatolia [27, 28], and Arabia [29] have indicated differing levels of individual mobility ranging from populations composed primarily of local individuals to those with very high levels of non-locals.

Tell Atchana (Alalakh), located in the Amuq Valley in modern day Turkey (Fig 1) is one among many urban sites in the Middle and Late Bronze Age (MBA and LBA, respectively; ca. 2000-1200 BC) Levant that functioned as the capital of a local kingdom, characterized by complex diplomatic and international relations and frequently shifting loyalties to bigger entities of the ancient Near East [30-33]. It is therefore a prime candidate for mobility studies, as there is a high likelihood that many different individuals from a wide range of origins both passed through and settled in the city.

# **Fig 1. Regional map showing the location of Tell Atchana.**

Isotope and ancient DNA (aDNA) analyses are two tools that shed light on the movement of individuals from different angles. With strontium and oxygen isotope ratios from tooth enamel, it is possible to identify people of non-local origin via comparison of measured ratios in the tissue of an individual and the local baseline [34-36]. Analysis of aDNA, on the other hand, sheds light on a person's ancestry [37-39]: compared against a set of available

ancient genomes of contemporary and older age from the same region and beyond, the genome of an individual holds key information about locality in terms of genetic continuity or discontinuity in an area through time or in terms of mobility as represented by genetic outlier individuals. While stable isotope analysis has been utilized in archaeology since the 1970s [34, 40, 41], full genome aDNA analyses on a large scale only became available during the last decade [37, 42]. Independently, both methods have proven powerful tools in detecting human mobility and to operate independently from archaeological concepts of burial traditions, but the exploration of their tandem potential has only recently started [43-45]. Nevertheless, the combination of both methods has yet to be applied systematically in the Ancient Near East.

In this study, we seek to explore human mobility at Tell Atchana on the basis of the most direct source available, the human remains themselves. In order to explore patterns of mobility among the individuals recovered, we performed strontium and oxygen isotope analysis and aDNA analysis on bones and teeth of individuals excavated at Tell Atchana from 2003-2017. We publish here the first strontium and oxygen isotope data of 53 and 77 individuals, respectively, and add genome-wide data for nine individuals to an existing dataset of 28 individuals recently published by Skourtanioti et al. [46], with sampled individuals coming from a wide range of different contexts. With this extensive, in-depth analysis of a large number of individuals from a single site, a study thus far unique for the ancient Near East, we demonstrate how isotope and aDNA data can complement or even contradict each other, and how both strands of evidence can be combined with the archaeological context in order to address questions regarding the nature and scale of individual mobility in the Near Eastern Bronze Age.

## **Tell Atchana**

Situated on the southward bend of the Orontes River in the modern state of Hatay, Turkey (see Fig 1), Tell Atchana (Alalakh) was founded in the terminal Early Bronze Age or the earliest MBA (ca. 2200-2000 BC), flourishing throughout the MBA and LBA until its nearly complete abandonment ca. 1300 BC [31-33, 47]. The site was first excavated in the 1930s-1940s by Sir Leonard Woolley [30, 48], who exposed large horizontal swathes of what came to be known as the ‘Royal Precinct’ of the site (Fig 2) and uncovered a continuous sequence of 18 levels from Level XVII to Level O [30], the latter now known to date to the Iron Age (Table 1) [32, 47, 49]. K. Aslihan Yener returned to the Amuq Valley in 1995 [50] and resumed ongoing excavations at Tell Atchana in 2003 [31, 32].

**Fig 2. Map of Tell Atchana with excavation squares indicated.**

**Table 1. Chronology of Tell Atchana.**

| Relative Date           | Woolley Level | Yener Period | Excavated Areas                            | Main Architectural Features                                    | Burials                                                 |
|-------------------------|---------------|--------------|--------------------------------------------|----------------------------------------------------------------|---------------------------------------------------------|
| Iron Age                | O             | 0            | Royal Precinct (Area 1)                    | uncertain - poorly preserved                                   | possible late burials?                                  |
| Late Bronze II          | I             | 1            | Royal Precinct (Area 1), Areas 2, 4        | Fort, Temple, houses                                           | intramural burials                                      |
|                         | II            | 2            | Royal Precinct (Area 1), Areas 2, 4        | Northern and Southern Fortresses, Temple, houses               | intramural burials                                      |
|                         | III           | 3            | Royal Precinct (Area 1), Areas 2, 4        | Temple, houses, workshops, Castle re-use                       | intramural burials                                      |
| Destruction ca. 1400 BC |               |              |                                            |                                                                |                                                         |
| Late Bronze I           | IV            | 4            | Royal Precinct (Area 1), Site H, Areas 2-4 | Palace, archive, houses, Castle, gate, western gate, workshops | extramural cemetery, intramural burials, Plastered Tomb |
|                         | V             | 5            | Royal Precinct (Area 1), Site H, Areas 3-4 | Temple, houses, workshops/domestic spaces                      | extramural cemetery, intramural burials                 |

|                                |      |   |                                            |                                                                                             |                                         |
|--------------------------------|------|---|--------------------------------------------|---------------------------------------------------------------------------------------------|-----------------------------------------|
|                                | VI   | 6 | Royal Precinct (Area 1), Site H, Areas 3-4 | Temple, workshops/domestic spaces                                                           | extramural cemetery, intramural burials |
| Fire/Conflagration ca. 1650 BC |      |   |                                            |                                                                                             |                                         |
| Middle Bronze II               | VII  | 7 | Royal Precinct (Area 1), Area 3-4          | Palace, archive, temples, rampart, city wall, tripartite gate, domestic and workshop spaces | extramural cemetery, intramural burials |
|                                | VIII | 8 | Royal Precinct (Area 1)                    | Palace, Temple                                                                              | intramural burials                      |

Texts from the palace archives dating from the MB II and LB I at Tell Atchana itself and from other sites that mention the city of Alalakh provide ample evidence about the city's significance as the capital of the region and its relations of exchange with its neighbors, such as Ebla, Ugarit, Halab, Emar, and cities in Cilicia, as well as entities located further away, like the state of Mitanni, Mari, the Kassite kingdom of Babylonia, the Hittites, and Middle and New Kingdom Egypt [5, 31, 51-57]. The textual record is matched by an archaeological record, particularly for the LBA, rich in imports (or objects imitating foreign styles) and architecture bearing foreign influences, including particular building methods, imported ceramic styles and small finds, and artistic motifs, such as Aegean-style bull-leaping scenes [30-33, 47, 57-75]. It is unclear how strongly this evidence was connected with the actual presence of people from abroad in permanent residence at Alalakh, however. While it is likely that at least some migrants lived and died at the site, it is impossible to make claims about the actual scale on the basis of texts and archaeology alone. It is also unclear whether these migrants were buried in the graves which have been excavated to date, making the site a perfect candidate for targeted mobility studies.

## Materials and methods

## Tell Atchana burial corpus

Burials at the site are present from the late MBA through the end of the LBA (stratigraphically, in contexts from Periods 8-1; see [Table 1](#)) and have been found in every excavated area of the site. Tell Atchana has one of the largest numbers of recorded burials in the area, incorporating different types of burials, burial goods, and burial locations, including both intramural burials (208 examples in total) and an extramural cemetery outside the city fortification wall in Area 3 (134 burials; see [Fig 2](#)) [76, 77]. The term ‘intramural’ is used here to differentiate these burials from the extramural burials and indicate their location within the walls of the city, rather than their location within buildings *per se*: they have been found in various contexts, such as in courtyards and other open spaces, in the ruins of abandoned buildings, and under intact floors. A total of 28 have been found in what appears to be an intramural cemetery recently discovered in the south of the mound in Area 4 (see [Fig 2](#)) [77, 78]. The presence of both intramural and extramural burials provides a rare opportunity to compare the two funerary practices at a single site.

The vast majority of the burials are single, primary pit graves, although there are a handful of secondary and/or multiple burials, as well as cist graves, pot burials, and cremations [77, 79]. This variety is a starting place to look for the presence of non-locals, who could be associated with these minority types of burials. In the extramural cemetery, grave goods are rare, with over half of the burials containing no grave goods, but when they are present, they typically consist of one or two vessels and perhaps an article of jewelry, most often a metal pin or a beaded bracelet/necklace [76]. The intramural burials, particularly those found in the Royal Precinct, are generally the richest in grave goods, with a wide variety of imported and local pottery, metal jewelry, and rarer items such as figurines and stone vessels [77, 79], supporting the suggestion that these burials represent a higher social class than the individuals interred in the extramural cemetery [59, 76, 77, 79]. The exception to this, and the most intriguing burial



at the site, is the Plastered Tomb. Located in the extramural cemetery, it was built of several layers of plaster encasing four individuals that dates to the end of LB I [80-82]. This is the richest burial found at the site, with 13 vessels and numerous items of adornment, including beads made of gold, carnelian, and vitreous materials, pins of bronze and silver, and pieces of foil and stamped appliques made of gold. Due to its unique status, its unusual construction, and its rich assemblage of objects, it was a particular target for this study.

In addition to these broad burial groupings, several individuals have been recovered who seem to have died as a result of some type of misadventure and did not receive formal burials, two of which are included in this study. The first, the so-called ‘Well Lady’ (ALA019), whose skeletal remains were found at the bottom of a well, was apparently thrown into the well while it was still in use, and homicide has been proposed as her manner of death [83]. The second, an adult female (ALA030), seems to have been killed during the destruction and collapse of a building in Area 3 [84].

## **The chronology of the burials**

The <sup>14</sup>C-AMS-dating published in Skourtanioti et al. [46] included 21 individuals from the extramural cemetery (Table 2, Fig 3). It indicates that the beginning of the cemetery’s use dates back into the MB I (i.e. before 1800 BC) and makes the extramural cemetery one of the oldest features that has been excavated at Tell Atchana to date. Furthermore, the radiocarbon dates of the extramural cemetery show a general discrepancy with the archaeological dating: while the former suggests that all individuals sampled (with the exception of those in the Plastered Tomb) date to the MBA (before 1600 cal BC), the latter puts the main use of the cemetery into LB I (ca. 1600-1400 BC), with only very few burials dated to MB II (ca. 1800-1600 BC) [76]. The reasons for this discrepancy could be general errors in the calibration curve for the Levantine area and/or that parts of the cemetery were only used during the MBA. It

seems rather unlikely that by chance only those extramural cemetery individuals which belong to the MBA were radiocarbon dated (for a detailed discussion of the dates and the stratigraphy see S1 Text). Compared to the  $^{14}\text{C}$ -results from the extramural cemetery, the dates from the intramural burials show a higher level of concordance with the archaeological (stratigraphic) dating, with only two out of eight  $^{14}\text{C}$  dates being substantially earlier (ALA016 and ALA020).

**Fig 3. All  $^{14}\text{C}$  dates from burials at Tell Atchana, including tentative archaeological dating to Period and relative archaeological era (indicated as [ERA], [PERIOD] to the left of the individuals sample IDs).**

**Table 2. All  $^{14}\text{C}$  dates from individuals, first published in Skourtanioti et al. [46].**

| Sample ID  | Archaeological ID                              | $^{14}\text{C}$ age (BP) | $\delta^{13}\text{C}_{\text{AM}} [\text{‰}]$ | Cal 1 $\sigma$   | Cal 2 $\sigma$   | C [%] | C:N | Collagen (%) | Skeletal Material | $^{14}\text{C}$ Lab ID | Relative Date |
|------------|------------------------------------------------|--------------------------|----------------------------------------------|------------------|------------------|-------|-----|--------------|-------------------|------------------------|---------------|
| ALA001.A   | 45.71, Locus 03-3017, Pail 257, Skeleton S04-9 | 3151 $\pm$ 24            | - 27,3                                       | cal BC 1491-1406 | cal BC 1498-1322 | 13.8  | 2.7 | 3.9          | petrous bone      | MAMS-33675             | LB I          |
| ALA002.A   | 45.71, Locus 03-3017, Pail 246, Skeleton S04-8 | 3158 $\pm$ 22            | - 18,8                                       | cal BC 1492-1412 | cal BC 1498-1389 | 13.1  | 2.6 | 1.5          | petrous bone      | MAMS-33676             | LB I          |
| ALA004.A   | 45.72, Locus 03-3002                           | 3507 $\pm$ 23            | - 18,5                                       | cal BC 1883-1774 | cal BC 1896-1746 | 22.2  | 2.8 | 5.8          | petrous bone      | MAMS-33677             | LB I          |
| ALA008.A   | 45.44, Locus 133, AT 17652                     | 3473 $\pm$ 23            | - 17,8                                       | cal BC 1874-1746 | cal BC 1881-1698 | 15.0  | 2.7 | 4.6          | petrous bone      | MAMS-33678             | LB I          |
| ALA009.B * | 45.44, Locus 135, AT 17689                     | 3552 $\pm$ 23            | -17,5                                        | cal BC 1937-1829 | cal BC 2008-1774 | 38.8  | 3.2 | 4.3          | M1                | MAMS-38608             | early LB I    |
| ALA009.C * | 45.44, Locus 135, AT 17689                     | 3416 $\pm$ 30            | -36,6                                        | cal BC 1747-1636 | cal BC 1872-1621 | 38.9  | 2.9 | 6            | rib fragment      | MAMS-38609             | early LB I    |

|          |                                     |              |           |                            |                         |      |     |     |                   |                |               |
|----------|-------------------------------------|--------------|-----------|----------------------------|-------------------------|------|-----|-----|-------------------|----------------|---------------|
| ALA011.A | 45.44,<br>Locus 146,<br>AT 18960    | 3382 ±<br>23 | -<br>14,9 | cal<br>BC<br>1688-<br>1626 | cal BC<br>1743-<br>1614 | 15.6 | 2.7 | 5.1 | petrous<br>bone   | MAMS-<br>33680 | late MB<br>II |
| ALA013.A | 45.44,<br>Locus 152,<br>AT 19260    | 3457 ±<br>24 | -<br>22,5 | cal<br>BC<br>1872-<br>1698 | cal BC<br>1880-<br>1690 | 31.6 | 2.9 | 3.9 | petrous<br>bone   | MAMS-<br>33681 | late MB<br>II |
| ALA014.A | 45.45,<br>Locus 8 and<br>9, AT 8836 | 3392 ±<br>23 | -<br>20,8 | cal<br>BC<br>1734-<br>1631 | cal BC<br>1743-<br>1620 | 33.1 | 2.9 | 4.2 | petrous<br>bone   | MAMS-<br>33682 | early LB<br>I |
| ALA015.A | 45.45,<br>Locus 48,<br>AT 015741    | 3566 ±<br>26 | -<br>19,3 | cal<br>BC<br>1952-<br>1882 | cal BC<br>2018-<br>1778 | 7.2  | 2.3 | 2.0 | petrous<br>bone   | MAMS-<br>33683 | early<br>LBI  |
| ALA016.A | 32.54,<br>Locus 85,<br>AT 017541    | 3284 ±<br>24 | -<br>28,0 | cal<br>BC<br>1606-<br>1508 | cal BC<br>1614-<br>1504 | 12.4 | 1.8 | 7.4 | petrous<br>bone   | MAMS-<br>33684 | LB I/II       |
| ALA017.A | 32.57,<br>Locus 164,<br>AT 10070    | 3264 ±<br>23 | -<br>24,5 | cal<br>BC<br>1598-<br>1500 | cal BC<br>1611-<br>1456 | 23.0 | 2.8 | 1.5 | petrous<br>bone   | MAMS-<br>33685 | early LB<br>I |
| ALA018.A | 42.29, 44, L.<br>237, AT<br>019127  | 3154 ±<br>26 | -<br>20,6 | cal<br>BC<br>1492-<br>1408 | cal BC<br>1499-<br>1322 | 22.5 | 2.8 | 1.5 | petrous<br>bone   | MAMS-<br>33686 | LB I          |
| ALA019.A | 32.57,<br>Locus 247,<br>AT 15878    | 3298 ±<br>23 | -<br>19,3 | cal<br>BC<br>1610-<br>1520 | cal BC<br>1616-<br>1510 | 34.5 | 2.9 | 8.7 | petrous<br>bone   | MAMS-<br>33687 | LB I          |
| ALA020.A | 44.86,<br>Locus 22,<br>AT 15460     | 3167 ±<br>29 | -<br>28,5 | cal<br>BC<br>1495-<br>1416 | cal BC<br>1504-<br>1396 | 12.2 | 3.3 | 0.3 | petrous<br>bone   | MAMS-<br>33688 | LB II         |
| ALA023.C | 45.44,<br>Locus 65,<br>AT 6029      | 3520 ±<br>25 | -<br>15,6 | cal<br>BC<br>1892-<br>1774 | cal BC<br>1928-<br>1751 | 39.7 | 2.9 | 1.8 | tibia<br>fragment | MAMS-<br>38610 | late LB I     |
| ALA024.A | 45.44,<br>Locus 68,<br>AT 6572      | 3586 ±<br>39 | -<br>29,1 | cal<br>BC<br>2014-<br>1890 | cal BC<br>2114-<br>1776 | 12.0 | 3.4 | 0.2 | petrous<br>bone   | MAMS-<br>33690 | LB I          |
| ALA025.A | 45.44,<br>Locus 66,<br>AT 6032      | 3443 ±<br>25 | -<br>27,7 | cal<br>BC<br>1869-<br>1692 | cal BC<br>1878-<br>1641 | 30.0 | 2.7 | 1.8 | petrous<br>bone   | MAMS-<br>33691 | LB I          |
| ALA026.A | 45.44,<br>Locus 70,<br>AT 6931      | 3390 ±<br>25 | -<br>23,1 | cal<br>BC<br>1732-<br>1630 | cal BC<br>1746-<br>1616 | 33.1 | 2.9 | 3.8 | petrous<br>bone   | MAMS-<br>33692 | LB I          |
| ALA028.A | 45.44,<br>Locus 73,<br>AT 7395      | 3440 ±<br>26 | -<br>29,5 | cal<br>BC<br>1868-<br>1690 | cal BC<br>1878-<br>1636 | 24.6 | 2.9 | 3.1 | petrous<br>bone   | MAMS-<br>33693 | LB I          |
| ALA029.A | 45.44,<br>Locus 79,<br>AT 7695      | 3465 ±<br>26 | -<br>16,7 | cal<br>BC<br>1874-<br>1702 | cal BC<br>1881-<br>1693 | 23.1 | 2.8 | 1.3 | petrous<br>bone   | MAMS-<br>33694 | LB I          |

|          |                                                                                 |              |           |                            |                         |      |      |      |                 |                |               |
|----------|---------------------------------------------------------------------------------|--------------|-----------|----------------------------|-------------------------|------|------|------|-----------------|----------------|---------------|
| ALA030.A | 45.44,<br>Locus 105,<br>AT 10669                                                | 3256 ±<br>25 | -<br>26,9 | cal<br>BC<br>1538-<br>1461 | cal BC<br>1610-<br>1448 | 23.1 | 2.8  | 2.2  | petrous<br>bone | MAMS-<br>33695 | early LB<br>I |
| ALA034.A | 45.45,<br>Locus 6, AT<br>8830                                                   | 3436 ±<br>24 | -<br>11,4 | cal<br>BC<br>1866-<br>1690 | cal BC<br>1876-<br>1634 | 30.9 | 3.3  | 1.4  | petrous<br>bone | MAMS-<br>33696 | LB I          |
| ALA035.A | 45.45,<br>Locus 7, AT<br>7940                                                   | 3543 ±<br>24 | -<br>10,7 | cal<br>BC<br>1930-<br>1782 | cal BC<br>1954-<br>1772 | 32.2 | 3.2  | 1.7  | petrous<br>bone | MAMS-<br>33697 | early LB<br>I |
| ALA037.A | 45.45,<br>Locus 30<br>and 31, AT<br>11452                                       | 3477 ±<br>24 | -<br>12,4 | cal<br>BC<br>1876-<br>1746 | cal BC<br>1882-<br>1700 | 19.6 | 3.2  | 1.8  | petrous<br>bone | MAMS-<br>33698 | early LB<br>I |
| ALA038.A | 45.71,<br>Locus 03-<br>3017, Pail<br>236,<br>Skeleton<br>S04-7                  | 3260 ±<br>24 | -<br>12,4 | cal<br>BC<br>1540-<br>1466 | cal BC<br>1612-<br>1452 | 41.8 | 3.2  | 18.0 | petrous<br>bone | MAMS-<br>33699 | LB I          |
| ALA039.A | 44.85,<br>Locus 15,<br>AT 14466                                                 | 3125 ±<br>24 | -<br>12,6 | cal<br>BC<br>1431-<br>1322 | cal BC<br>1491-<br>1301 | 38.4 | 3.2  | 3.4  | petrous<br>bone | MAMS-<br>33700 | LB II         |
| ALA084.B | 45.72,<br>Locus 03-<br>3065,<br>skeleton<br>S04-19                              | 3556 ±<br>25 | -<br>16,6 | cal<br>BC<br>1942-<br>1830 | cal BC<br>2012-<br>1775 | 3.2  | 33.3 | 2.2  | M2              | MAMS-<br>41108 | Early<br>LB I |
| ALA095.A | 45.72;<br>Locus 03-<br>3013, Locus<br>03-3016;<br>Pail 54;<br>Skeleton<br>S04-6 | 3516 ±<br>25 | -<br>22,8 | cal<br>BC<br>1889-<br>1774 | cal BC<br>1922-<br>1750 | 3.2  | 36.3 | 7.2  | M3              | MAMS-<br>41109 | LB I          |

\*Date not published in Skourtanioti et al. [46].

## Sampling strategies and the datasets

Individuals for aDNA and isotope sampling were selected in order to be as representative as possible of the burial corpus as a whole, choosing individuals from all available intra- and extramural contexts, different types of burials (primary and secondary, single and multiple), varying age groups (with an emphasis on adult individuals), and both sexes, with age and sex data based on osteological analysis conducted by R. Shafiq. For aDNA analysis, we primarily targeted the petrous bone, the skeletal element which has been shown to

best preserve human DNA, and as a secondary potential element, we used teeth [85-87]. For isotope analysis, we preferentially used permanent second molars, as the M2 is formed between the ages of ca. 2-8 years [88, 89], thereby being more likely to show isotopic signals with minimal interference from breastfeeding effects [27, 90-92]. Where no second molar was available, the M3 (formed between ca. 7-14 years [88]), M1 (formed between ca. the last month in utero to 3 years of age [88]), or a premolar (formed between ca. 1-7 years, depending on which premolar [88]) were sampled in descending order of preference. Environmental bulk reference samples (n = 16) for isotopic analysis were taken from modern and archaeological snails, as well as archaeological rodents (Table 3), in order to establish a local range for biologically available strontium, both at Tell Atchana and across the Amuq Valley more broadly. Five bulk faunal samples were also taken for oxygen isotopic analysis in order to compare the results to those of the humans.

**Table 3. All faunal samples.**

| Sample ID | $^{87}\text{Sr}/^{86}\text{Sr}$ | $\pm 2$ SD internal | $\delta^{18}\text{O}$ (‰) | SD   | Species                  | Context       |
|-----------|---------------------------------|---------------------|---------------------------|------|--------------------------|---------------|
| AT 0263   | -                               | -                   | -2.2                      | 0.05 | <i>Bos taurus</i>        | Sq. 64.82.2   |
| AT 1074   | -                               | -                   | -7.2                      | 0.04 | <i>Bos taurus</i>        | Sq. 64.82.17  |
| AT 1141   | 0.708544                        | 0.000010            | -5.3                      | 0.16 | <i>Spalax leucodon</i>   | Sq. 64.72.8   |
| AT 11570  | 0.708440                        | 0.000009            | -                         | -    | <i>Gastropoda</i>        | Sq. 42.29.9   |
| AT 12146  | 0.708411                        | 0.000013            | -                         | -    | <i>Gastropoda</i>        | Sq. 32.54.66  |
| AT 12952  | 0.708296                        | 0.000010            | -                         | -    | <i>Gastropoda</i>        | Sq. 32.57.219 |
| AT 2051   | 0.708111                        | 0.000015            | -                         | -    | <i>Gastropoda</i>        | Sq. 33.32.1   |
| AT 3061   | 0.708418                        | 0.000012            | -                         | -    | <i>Rodentia</i>          | Sq. 64.73.9   |
| AT 3064   | -                               | -                   | -2.4                      | 0.03 | <i>Caprinae</i>          | Sq. 64.73.7   |
| AT 8302   | -                               | -                   | -4.4                      | 0.05 | <i>Sus scrofa</i>        | Sq. 64.82.56  |
| AT 9580   | 0.708305                        | 0.000011            | -                         | -    | <i>Gastropoda</i>        | Sq. 45.44.94  |
| G1.5A     | 0.708807                        | 0.000013            | -                         | -    | modern <i>Gastropoda</i> | Kamberli      |
| G2.2      | 0.707924                        | 0.000013            | -                         | -    | modern <i>Gastropoda</i> | Kırıkhan      |
| G2.6      | 0.707984                        | 0.000012            | -                         | -    | modern <i>Gastropoda</i> | Reyhanlı      |
| G3.3B     | 0.708359                        | 0.000013            | -                         | -    | modern <i>Gastropoda</i> | Hacıpaşa      |

|       |          |          |   |   |                             |           |
|-------|----------|----------|---|---|-----------------------------|-----------|
| G3.4A | 0.708661 | 0.000011 | - | - | modern<br><i>Gastropoda</i> | Hacıpaşa  |
| G4.2C | 0.708302 | 0.000011 | - | - | modern<br><i>Gastropoda</i> | UyduKent  |
| G5.5  | 0.708522 | 0.000014 | - | - | modern<br><i>Gastropoda</i> | Avcılar   |
| G6.2A | 0.708211 | 0.000015 | - | - | modern<br><i>Gastropoda</i> | Ceylanlı  |
| G6.7  | 0.707376 | 0.000014 | - | - | modern<br><i>Gastropoda</i> | Haydarlar |

Analysis of aDNA – which, as an organic material, is subject to *post-mortem* decomposition – has a variable success rate: samples from 116 individuals from Alalakh were analyzed, but 1240K SNP data could be produced only for 37 (including both this study and Skourtanioti et al. [46]). An “ALAXXX” sample number was assigned to each analyzed individual (Table 4). All samples were photographed and documented prior to any destructive sampling, and teeth were additionally CT scanned at Max Planck Institute for the Science of Human History (MPI-SHH) in order to preserve a complete record of dental features. Currently,  $^{87}\text{Sr}/^{86}\text{Sr}$  results from tooth enamel samples are available for 53 individuals,  $\delta^{18}\text{O}$  results for 77 individuals, and aDNA results for 37 individuals (see Table 4; see also S1 Table).

**Table 4. All individuals included in this study.**

| Sample ID | Arch. ID        | $\delta^{18}\text{O}$ (‰) | $\delta^{13}\text{C}$ (‰) | $^{87}\text{Sr}/^{86}\text{Sr}$ | aDNA <sup>a</sup> | Tooth Sample <sup>b</sup> | Location            | Burial Type                              | Sex <sup>c</sup> | Age <sup>c</sup> | Period <sup>d</sup> | Grave goods? |
|-----------|-----------------|---------------------------|---------------------------|---------------------------------|-------------------|---------------------------|---------------------|------------------------------------------|------------------|------------------|---------------------|--------------|
| ALA001    | L03-3017, P.257 | -4.1                      | -11.7                     | 0.708120                        | yes               | M2                        | extramural cemetery | Plastered Tomb                           | male             | 40-45 years      | 4                   | yes          |
| ALA002    | L03-3017, P.246 | -4.2                      | -12.9                     | 0.708346                        | yes               | M2                        | extramural cemetery | Plastered Tomb                           | male             | 19-21 years      | 4                   | yes          |
| ALA003    | L03-3017, P.250 | -5.8                      | -12.4                     | 0.708278                        | -                 | M2                        | extramural cemetery | Plastered Tomb                           | female           | 40-45 years      | 4                   | yes          |
| ALA004    | L03-3002, P.40  | -                         | -                         | 0.707630                        | yes               | M2                        | extramural cemetery | primary pit grave with bone scatter atop | male             | 40-45 years      | 6                   | no           |

|        |           |      |       |          |     |         |                                    |                                                                 |        |               |         |     |
|--------|-----------|------|-------|----------|-----|---------|------------------------------------|-----------------------------------------------------------------|--------|---------------|---------|-----|
| ALA008 | 45.44.133 | -    | -     | 0.708431 | yes | M1      | extramural cemetery                | primary, single pit grave                                       | male   | 25-35 years   | 5-6     | no  |
| ALA009 | 45.44.135 | -    | -     | 0.708277 | yes | M1      | extramural cemetery                | primary, single pit grave                                       | female | 50-60 years   | 6       | yes |
| ALA011 | 45.44.146 | -    | -     | 0.708525 | Yes | dec. M1 | Area 3 room                        | primary, single pit grave                                       | male   | 3.5-4 years   | 7       | yes |
| ALA013 | 45.44.152 | -    | -     | 0.708350 | yes | dec. I  | extramural cemetery                | primary, single pit grave                                       | female | 0.5-1.5 years | 7       | yes |
| ALA014 | 45.45.9   | -    | -     | 0.708651 | yes | PM2     | extramural cemetery                | primary, single pit grave                                       | male   | 35-55 years   | 6       | no  |
| ALA015 | 45.45.19  | -    | -     | 0.708406 | yes | PM      | extramural cemetery                | primary, single pit grave                                       | male   | 20-50 years   | early 6 | yes |
| ALA016 | 32.54.85  | -    | -     | 0.707937 | yes | M       | Royal Precinct, transitional layer | primary, single pit grave                                       | female | 65-75 years   | 3-4     | yes |
| ALA017 | 32.57.160 | -    | -     | 0.708272 | yes | M       | Royal Precinct, under street       | primary, single pit grave                                       | female | 17-25 years   | 6       | yes |
| ALA018 | 42.29.44  | -    | -     | 0.708405 | yes | I       | Area 1, accumulation fill          | primary, single pit grave                                       | male   | 4-5 years     | 4       | yes |
| ALA019 | 32.57.247 | -    | -     | 0.708456 | yes | M1      | Royal Precinct, bottom of well     | accidental death/possible murder; no burial                     | female | 40-45 years   | 6       | N/A |
| ALA019 | 32.57.247 | -    | -     | 0.708474 | yes | M2      | Royal Precinct, bottom of well     | accidental death/possible murder; no burial                     | female | 40-45 years   | 6       | N/A |
| ALA019 | 32.57.247 | -    | -     | 0.708540 | yes | M3      | Royal Precinct, bottom of well     | accidental death/possible murder; no burial                     | female | 40-45 years   | 6       | N/A |
| ALA020 | 44.86.18  | -    | -     | 0.708043 | yes | M3      | Area 2, debris layer               | primary, single pit grave                                       | female | 17-25 years   | 1-2     | no  |
| ALA021 | 45.44.43  | -4.3 | -12.7 | 0.708201 | -   | M2      | extramural cemetery                | primary pit grave with complete individual and skeletal element | male   | 40-44 years   | 4       | no  |

|        |           |      |       |          |     |         |                     |                                                                                         |        |             |     |     |
|--------|-----------|------|-------|----------|-----|---------|---------------------|-----------------------------------------------------------------------------------------|--------|-------------|-----|-----|
|        |           |      |       |          |     |         |                     | s from a child                                                                          |        |             |     |     |
| ALA022 | 45.44.56  | -4.2 | -12.2 | 0.708176 | -   | M2      | extramural cemetery | primary, single pit grave                                                               | female | 20-30 years | 4   | yes |
| ALA023 | 45.44.65  | -6.0 | -14.1 | -        | yes | dec. M2 | extramural cemetery | primary, single pit grave                                                               | female | 6.5-7 years | 4   | yes |
| ALA024 | 45.44.68  | -3.9 | -12.7 | 0.708258 | yes | M2      | extramural cemetery | primary, single pit grave                                                               | female | 2-3 years   | 4-5 | yes |
| ALA025 | 45.44.66  | -5.8 | -12.0 | 0.708451 | yes | M2      | extramural cemetery | primary, single pit grave                                                               | female | 13-14 years | 4-5 | yes |
| ALA026 | 45.44.70  | -4.6 | -11.9 | -        | yes | dec. M2 | extramural cemetery | primary, single pit grave                                                               | male   | 3.5-4 years | 5   | yes |
| ALA027 | 45.44.71  | -5.5 | -11.9 | 0.708664 | -   | M2      | extramural cemetery | primary, single pit grave                                                               | male   | 45-55 years | 4-5 | yes |
| ALA028 | 45.44.73  | -5.9 | -12.7 | 0.708099 | yes | M2      | extramural cemetery | disturbed primary, single pit grave                                                     | female | 30-40 years | 5   | no  |
| ALA029 | 45.44.79  | -4.5 | -12.1 | 0.708230 | yes | M2      | extramural cemetery | primary, single pit grave; reopened in antiquity                                        | female | 20-30 years | 5   | yes |
| ALA030 | 45.44.105 | -5.9 | -11.6 | 0.708345 | yes | M2      | Area 3 room         | accidental death; no burial                                                             | female | 40-44 years | 6   | N/A |
| ALA032 | 45.45.3   | -5.2 | -11.8 | 0.708207 | -   | M2      | extramural cemetery | primary, single pit grave                                                               | female | 35-45 years | 5   | no  |
| ALA033 | 45.45.4   | -    | -     | 0.709061 | -   | PM      | extramural cemetery | primary, single pit grave                                                               | female | 35-45 years | 6   | yes |
| ALA034 | 45.45.6   | -3.6 | -12.1 | -        | yes | M2?     | extramural cemetery | primary, single pit grave                                                               | male   | 35-45 years | 6   | no  |
| ALA035 | 45.45.7   | -4.3 | -11.6 | -        | yes | M2      | extramural cemetery | primary pit grave with elements from multiple other individuals; disturbed? secondarily | male   | 25-35 years | 6   | no  |



|        |                 |      |       |          |     |    |                     |                                                                           |        |             |           |     |
|--------|-----------------|------|-------|----------|-----|----|---------------------|---------------------------------------------------------------------------|--------|-------------|-----------|-----|
|        |                 |      |       |          |     |    |                     | deposited?                                                                |        |             |           |     |
| ALA036 | 45.45.11        | -4.5 | -11.9 | -        | -   | M2 | extramural cemetery | disturbed primary, single pit grave                                       | unk.   | 10-11 years | 6         | no  |
| ALA037 | 45.45.31        | -4.4 | -12.3 | 0.707444 | yes | M2 | extramural cemetery | multiple individuals; secondary burial or possible slope wash disturbance | female | unk.        | early 6   | no  |
| ALA038 | L03-3017, P.236 | -4.3 | -12.5 | 0.708409 | yes | M2 | extramural cemetery | Plastered Tomb                                                            | female | 35-45 years | 4         | yes |
| ALA039 | 44.85.15        | -    | -     | -        | yes | -  | Area 2 fill deposit | likely secondary, single pit burial                                       | female | 50-60 years | 1-2       | yes |
| ALA045 | 45.45.10        | -5.3 | -12.3 | 0.708121 | -   | M2 | extramural cemetery | primary, single pit grave                                                 | female | 35-39 years | 6         | yes |
| ALA046 | 45.45.13        | -4.2 | -12.4 | -        | -   | M2 | extramural cemetery | primary, single pit grave                                                 | unk.   | 20-50 years | 6         | yes |
| ALA048 | 45.45.23        | -4.6 | -12.6 | 0.707851 | -   | M2 | extramural cemetery | secondary burial of three mandibles                                       | unk.   | unk.        | 6         | yes |
| ALA048 | 45.45.23        | -4.6 | -12.6 | 0.708032 | -   | M3 | extramural cemetery | secondary burial of three mandibles                                       | unk.   | unk.        | 6         | yes |
| ALA052 | 45.45.33        | -6.2 | -12.4 | -        | -   | M2 | extramural cemetery | primary, single pit grave                                                 | female | 30-40 years | 6         | yes |
| ALA055 | 45.44.41        | -4.2 | -12.4 | 0.708242 | -   | M2 | extramural cemetery | primary, single pit grave                                                 | unk.   | adult       | 4         | yes |
| ALA057 | 45.45.50        | -3.9 | -12.4 | 0.708769 | -   | M2 | extramural cemetery | primary, single pit grave                                                 | female | 35-55 years | early 7/8 | yes |
| ALA059 | 45.44.55        | -5.8 | -11.7 | -        | -   | M3 | extramural cemetery | primary, single pit grave                                                 | unk.   | 3-5 years   | 4         | yes |
| ALA060 | 45.44.62        | -5.2 | -11.8 | 0.708201 | -   | M2 | extramural cemetery | secondary pit                                                             | male   | adult       | 4         | no  |

|        |           |      |       |          |     |    |                      |                                                                                 |              |             |         |     |
|--------|-----------|------|-------|----------|-----|----|----------------------|---------------------------------------------------------------------------------|--------------|-------------|---------|-----|
|        |           |      |       |          |     |    |                      | burial of two mandibles                                                         |              |             |         |     |
| ALA061 | 45.44.67  | -5.9 | -13.2 | 0.708090 | -   | M2 | extramural cemetery  | secondary, single pit burial                                                    | female       | 20-25 years | 4-5     | no  |
| ALA063 | 45.44.82  | -5.7 | -13.3 | -        | -   | M2 | extramural cemetery  | primary, single pit grave                                                       | female       | 20-30 years | 5       | yes |
| ALA067 | 45.44.113 | -5.7 | -12.6 | 0.708379 | -   | M2 | extramural cemetery  | primary, single pit grave                                                       | male         | 20-25 years | 5       | no  |
| ALA069 | 45.44.120 | -6.1 | -13.4 | 0.708078 | -   | M2 | extramural cemetery  | primary, single pit grave                                                       | male         | 25-35 years | 5       | yes |
| ALA070 | 45.44.121 | -4.5 | -12.7 | -        | -   | M2 | extramural cemetery  | primary, single pit grave with scattered remains of multiple individuals on top | female       | 40-50 years | 6       | yes |
| ALA072 | L03-2025  | -    | -     | 0.708839 | -   | M1 | Area 2 mixed deposit | primary, single pit grave                                                       | female       | 17-25 years | 4       | no  |
| ALA073 | L03-3009  | -6.1 | -12.5 | -        | -   | M2 | extramural cemetery  | primary, pit grave with two individuals                                         | male         | 35-45 years | 6       | yes |
| ALA074 | L03-3011  | -7.1 | -13.3 | -        | -   | M3 | extramural cemetery  | primary, single pit grave                                                       | female       | 35-45 years | 4       | yes |
| ALA081 | L03-3057  | -4.7 | -12.5 | 0.708304 | -   | M2 | extramural cemetery  | primary, pit grave with two individuals                                         | male         | 30-35 years | early 6 | yes |
| ALA084 | L03-3065  | -4.7 | -11.8 | 0.708228 | yes | M2 | extramural cemetery  | primary, single pit grave                                                       | female       | 25-30 years | early 6 | no  |
| ALA085 | L03-3066  | -6.1 | -11.6 | 0.708268 | -   | M2 | extramural cemetery  | primary, single pit grave                                                       | poss. female | 25-35 years | early 6 | yes |
| ALA086 | L03-3054  | -4.1 | -12.2 | 0.708206 | -   | M2 | extramural cemetery  | primary, single pit grave                                                       | unk.         | 8-13 years  | 6       | yes |
| ALA087 | L03-3027  | -5.4 | -12.8 | 0.708112 | -   | M2 | extramural cemetery  | primary, single pit grave                                                       | unk.         | 12-15 years | 6       | no  |

|        |          |      |       |          |     |    |                     |                                                                                  |      |             |   |     |
|--------|----------|------|-------|----------|-----|----|---------------------|----------------------------------------------------------------------------------|------|-------------|---|-----|
| ALA089 | L03-3014 | -5.7 | -11.5 | 0.708076 | -   | M2 | extramural cemetery | primary, single pit grave with scattered remains of multiple individuals on top  | unk. | 6-11 years  | 6 | no  |
| ALA090 | L03-3019 | -7.3 | -12.4 | -        | -   | M2 | extramural cemetery | primary, single pit grave                                                        | unk. | 15-19 years | 4 | no  |
| ALA092 | L03-3013 | -4.1 | -12.5 | 0.708281 | -   | M2 | extramural cemetery | primary, pit grave with two individuals                                          | unk. | 4-5 years   | 6 | yes |
| ALA095 | L03-3016 | -    | -     | 0.708391 | yes | M3 | extramural cemetery | primary, single pit grave with co-mingled remains of multiple individuals on top | male | 25-35 years | 4 | no  |
| ALA096 | L03-3016 | -5.6 | -11.7 | -        | -   | M2 | extramural cemetery | primary, single pit grave with co-mingled remains of multiple individuals on top | unk. | unk.        | 4 | no  |
| ALA097 | 45.44.53 | -5.6 | -12.7 | -        | -   | M2 | extramural cemetery | primary, single pit grave                                                        | male | 40-45 years | 4 | no  |
| ALA098 | 45.45.23 | -4.6 | -12.5 | 0.706801 | -   | M2 | extramural cemetery | secondary burial of three mandibles                                              | unk. | unk.        | 6 | yes |
| ALA098 | 45.45.23 | -4.6 | -12.5 | 0.706755 | -   | M3 | extramural cemetery | secondary burial of three mandibles                                              | unk. | unk.        | 6 | yes |
| ALA099 | 45.45.23 | -4.5 | -11.3 | 0.707977 | -   | M2 | extramural cemetery | secondary burial of three mandibles                                              | unk. | unk.        | 6 | yes |

|        |           |      |       |          |      |         |                                    |                                                                         |        |               |           |     |
|--------|-----------|------|-------|----------|------|---------|------------------------------------|-------------------------------------------------------------------------|--------|---------------|-----------|-----|
| ALA101 | 45.45.54  | -5.0 | -12.7 | 0.708204 | -    | M2      | extramural cemetery                | primary, single pit grave                                               | female | 25-35 years   | early 7/8 | yes |
| ALA103 | 45.45.6a  | -6.7 | -12.5 | -        | -    | M2      | extramural cemetery                | primary, single pit grave                                               | male   | 25-35 years   | 5         | no  |
| ALA104 | 45.45.45  | -5.2 | -12.0 | 0.708223 | -    | M2      | extramural cemetery                | primary, pit grave with two individuals                                 | unk.   | ca. 3.5 years | 7         | yes |
| ALA105 | 45.45.43  | -4.9 | -12.8 | 0.708214 | -    | M2      | extramural cemetery                | primary, pit grave with two individuals                                 | female | 35-45 years   | 7         | yes |
| ALA110 | 45.45.48  | -4.4 | -13.1 | 0.706770 | -    | M2      | extramural cemetery                | primary, single pit grave                                               | female | 65-75 years   | 7         | no  |
| ALA110 | 45.45.48  | -4.4 | -13.1 | 0.708303 | -    | M3      | extramural cemetery                | primary, single pit grave                                               | female | 65-75 years   | 7         | no  |
| ALA111 | L03-3015  | -5.6 | -12.9 | 0.708436 | -    | M2      | extramural cemetery                | primary, single pit grave with co-mingled remains of individuals on top | male   | 20-35 years   | 6         | no  |
| ALA112 | 45.45.17  | -5.7 | -12.6 | -        | -    | M2      | extramural cemetery                | primary, single pit grave                                               | female | 20-30 years   | 6         | yes |
| ALA113 | 45.44.31  | -5.4 | -12.9 | -        | -    | M2      | extramural cemetery                | primary, single pit grave                                               | unk.   | 25-35 years   | 4         | yes |
| ALA114 | 44.85.32  | -    | -     | 0.708554 | -    | M1      | Area 2 fill deposit                | primary, single pit grave                                               | female | 40-45 years   | 1-2       | yes |
| ALA115 | 45.44.21  | -4.2 | -12.3 | 0.708201 | -    | M2      | Area 3 room                        | primary, single pit grave                                               | unk.   | adolescent    | 4         | yes |
| ALA116 | L03-3060  | -5.3 | -11.4 | -        | -    | M2      | extramural cemetery                | primary, single pit grave                                               | unk.   | 3-6 years     | early 6   | yes |
| ALA118 | 32.53.111 | -5.8 | -13.3 | -        | yes* | M2      | Royal Precinct, transitional layer | primary, single pit grave                                               | female | 45-50 years   | 3-4       | yes |
| ALA119 | 32.53.136 | -4.8 | -13.5 | -        | -    | M2      | Royal Precinct courtyard           | primary, single pit grave                                               | female | 30-35 years   | 4         | yes |
| ALA120 | 32.54.81  | -6.5 | -12.0 | -        | yes* | dec. M1 | Royal Precinct, transitional layer | primary, single pit grave                                               | male   | 1-2 years     | 3-4       | yes |

|        |           |      |       |   |      |         |                            |                                                           |        |              |      |     |
|--------|-----------|------|-------|---|------|---------|----------------------------|-----------------------------------------------------------|--------|--------------|------|-----|
| ALA122 | 44.95.9   | -6.2 | -11.8 | - | -    | M2      | Area 2 courtyard           | primary, single pit grave                                 | female | 45-50 years  | 1-2  | no  |
| ALA123 | 45.44.147 | -3.2 | -11.5 | - | yes* | M2      | Area 3 room                | Primary, single pit grave                                 | male   | 3-4 months   | 7    | no  |
| ALA124 | 45.44.151 | -4.7 | -12.4 | - | yes* | M1      | Area 3 room                | Primary, single pit grave                                 | male   | ca. 40 weeks | 7    | no  |
| ALA125 | 64.72.100 | -5.1 | -11.1 | - | -    | M3      | Area 4 intramural cemetery | primary, single burial in a possible mudbrick cist grave  | male   | 55-65 years  | 5    | yes |
| ALA126 | 64.72.101 | -5.7 | -12.0 | - | -    | M2      | Area 4 intramural cemetery | primary, single burial in a stone and mudbrick cist grave | male   | 45-50 years  | 5    | yes |
| ALA127 | 64.72.113 | -5.7 | -12.4 | - | -    | M2      | Area 4 fill deposit        | loose teeth                                               | unk.   | unk.         | LB I | N/A |
| ALA128 | 64.72.120 | -4.8 | -12.5 | - | -    | M2      | Area 4 intramural cemetery | primary, single pit grave                                 | male   | 35-45 years  | 5    | yes |
| ALA129 | 64.72.123 | -5.0 | -12.9 | - | -    | M2      | Area 4 intramural cemetery | primary, single burial in a stone and mudbrick cist grave | female | 25-35 years  | 5    | yes |
| ALA130 | 64.72.128 | -3.5 | -11.9 | - | yes* | dec. M1 | Area 4 intramural cemetery | primary, single pit grave                                 | female | 4-5 months   | 5    | no  |
| ALA131 | 64.72.135 | -5.7 | -13.4 | - | yes* | M2      | Area 4 intramural cemetery | primary, single pit grave                                 | male   | 35-40 years  | 4    | yes |
| ALA132 | 64.72.136 | -5.5 | -13.0 | - | -    | M2      | Area 4 intramural cemetery | primary, single pit grave                                 | female | 25-30 years  | 4    | no  |
| ALA133 | 64.72.137 | -6.4 | -13.6 | - | -    | M2      | Area 4 intramural cemetery | primary, single pit grave                                 | unk.   | 12-13 years  | 6    | no  |
| ALA134 | 64.72.138 | -5.7 | -13.9 | - | -    | dec. M2 | Area 4 intramural cemetery | primary, single pit grave                                 | unk.   | ca. 4 years  | 6    | yes |
| ALA135 | 64.72.139 | -4.6 | -13.7 | - | yes* | dec. M2 | Area 4 intramural cemetery | primary, single pit grave                                 | female | 5-6 years    | 6    | yes |

|        |               |      |       |   |      |            |                                  |                                                                                                                                                             |               |                |   |     |
|--------|---------------|------|-------|---|------|------------|----------------------------------|-------------------------------------------------------------------------------------------------------------------------------------------------------------|---------------|----------------|---|-----|
| ALA136 | 64.72.<br>141 | -7.3 | -12.2 | - | yes* | dec.<br>M1 | Area 4<br>intramural<br>cemetery | primary,<br>single<br>pit grave                                                                                                                             | male          | 1.5-2<br>years | 6 | yes |
| ALA138 | 64.72.<br>144 | -    | -     | - | yes* | -          | Area 4<br>intramural<br>cemetery | Primary,<br>single<br>pit grave                                                                                                                             | male          | 1-2<br>months  | 6 | no  |
| ALA139 | 64.72.<br>150 | -4.5 | -13.8 | - | -    | M2         | Area 4<br>intramural<br>cemetery | primary,<br>single<br>pit grave                                                                                                                             | female        | 50-53<br>years | 5 | yes |
| ALA140 | 64.72.<br>153 | -6.8 | -13.0 | - | -    | M3         | Area 4<br>intramural<br>cemetery | primary,<br>single<br>pit grave                                                                                                                             | female        | 40-50<br>years | 6 | yes |
| ALA141 | 64.73.<br>88  | -5.4 | -13.1 | - | -    | M2         | Area 4<br>intramural<br>cemetery | primary,<br>single<br>pit grave with<br>partial remains<br>of a second<br>individual;<br>reopened in<br>antiquity to<br>remove some<br>skeletal<br>elements | poss.<br>male | 17-18<br>years | 4 | no  |

<sup>a</sup>The nine individuals newly reported in this study are marked with an asterisk (\*). All others were published in Skourtanioti et al. [46].

<sup>b</sup>“Dec.” = deciduous teeth; “unk.” = unknown; “I” = unspecified incisor; “M” = unspecified molar; “PM” = unspecified premolar.

<sup>c</sup>Based on the ongoing analyses by R. Shafiq.

<sup>d</sup>The majority of the Periods listed here are provisional, as many of the contexts are still under analysis, and may change as research progresses.

Although the sampled skeletal assemblage does not reflect the excavated burials at Alalakh as a whole, as the sampled individuals are biased towards the extramural cemetery (Fig 4), it includes individuals from all Areas excavated by Yener. This imbalance is a result of the fact that nearly three-quarters of the intramural burials were recovered during the previous excavations by Woolley (151 individuals of 208 intramural burials = 72.6%) and are therefore unavailable for sampling, as Woolley did not keep the human remains he found (see Fig 4). The situation is similar for the numbers of individuals sampled from each archaeological period (Fig 5), as the majority of the LB II individuals were excavated by Woolley [77]. Sub-adults as a

group generally are also somewhat underrepresented among the analyzed individuals (Fig 6), due to this study's preference for 2<sup>nd</sup> (and 3<sup>rd</sup>) permanent molars, but the proportions of age classes is, again, roughly representative of the available material. Given the limitations of available material, therefore, the sampled individuals are as representative as possible for the excavated burials as a whole, and, most importantly, cover all known contexts and burial types.

**Fig 4. Contexts of the total assemblage available for sampling (i.e., excavated by Yener), as well as those sampled for each analysis presented.**

**Fig 5. Relative dating based on stratigraphy and context of the total assemblage available for sampling (i.e., excavated by Yener), as well as those sampled for each analysis presented.**

**Fig 6. Ages of the total assemblage available for sampling (i.e., excavated by Yener), as well as those sampled for each analysis presented.**

However, the excavated burials certainly do not represent the total population who lived and died at the city over the course of its history. It is possible that large swathes of individuals who lived at the site are currently missing from view due to their graves either not having been preserved due to taphonomic processes, not (yet?) having been recovered, or perhaps being archaeologically invisible, due to practices such as off-site burial.

## **Isotopic analysis background**

The key principle in applying  $\delta^{18}\text{O}$  and  $^{87}\text{Sr}/^{86}\text{Sr}$  values to the study of past mobility is a comparison between the isotopic composition in the tooth enamel of excavated individuals and the hydrologically and biologically available signatures at the same place. If a person spent their childhood prior to the completion of enamel formation of sampled permanent teeth at a

different place than their adulthood (typically taken to be represented by the place where the individual was buried), this should result in a mismatch between the  $\delta^{18}\text{O}$  and/or  $^{87}\text{Sr}/^{86}\text{Sr}$  values in their teeth versus the environment, provided the bioavailable isotopic signatures of both places differ from one another [35, 89, 93-103].

Stable oxygen isotopes ( $\delta^{18}\text{O}$ ) of human tooth enamel are mainly derived from drinking water [94, 97, 99-101] which, in turn, is determined by the interaction of several factors, most importantly, elevation, temperature, humidity, and distance from the sea [93, 95, 96]. In the Amuq Valley,  $\delta^{18}\text{O}$  values of modern precipitation average between -7‰ and -6‰ (Fig 7) [104-107], which is also consistent with measured Orontes water values from Syria [108-110]. However, climate change could have altered the bioavailable oxygen over time, and therefore intra-population analysis is generally the preferred method of evaluating  $\delta^{18}\text{O}$  results [111], as well as comparisons to faunal samples.

**Fig 7. Mean annual  $\delta^{18}\text{O}$  values for modern precipitation in the regions surrounding Tell Atchana. Isotopic data from OIPC [104-106].**

Strontium in the human body, on the other hand, is incorporated via both food and water, with the biologically available  $^{87}\text{Sr}/^{86}\text{Sr}$  composition at a location depending mainly on the underlying geological formations.  $^{87}\text{Sr}$  forms during the radioactive decay of  $^{87}\text{Rb}$ ; therefore, while the amount of  $^{86}\text{Sr}$  in each rock is stable, the amount of  $^{87}\text{Sr}$  varies depending on the type of rock (which determines the initial quantity of  $^{87}\text{Rb}$  and total Sr) and the rock's age. Weathering processes wash the strontium into soils and runoff water, where it is taken up by plants and then passed on to humans and animals alike, being incorporated into skeletal tissue and teeth during mineralization, as a substitute for calcium, without significant isotopic fractionation [35, 89, 98].



A knowledge of local geology is therefore crucial in order to establish a baseline for strontium isotopic studies. The surface of the Amuq Plain itself is made up mainly of alluvial sediments from the three major rivers (the Orontes, the Kara Su, and Afrin) and eroded material from the highlands surrounding it [112] (Fig 8). The highlands to the south of the valley, which are part of the Arabian Platform [113], are made up of mostly limestone and other carbonate rocks of relatively young age (mainly Miocene and Eocene formations;  $^{87}\text{Sr}/^{86}\text{Sr}$  values typically of 0.707-0.709 [114]). There are areas of basalt bedrock in some parts of the Kurt Mountains to the south, which are mostly from the Miocene and Eocene [112, 115], and these can be expected to have somewhat lower  $^{87}\text{Sr}/^{86}\text{Sr}$  values (in the range of 0.703-0.705 [116, 117]). Basalt of a somewhat later age, from the Pliocene, can also be found in the northeast of the plain [113, 118, 119], and these areas may be expected to have roughly similar  $^{87}\text{Sr}/^{86}\text{Sr}$  values.

**Fig 8. Geological map of the Amuq Valley and surrounding regions, with modern snail sample locations marked. Data courtesy of the Amuq Valley Regional Project.**

The Amanus Mountains are much more geologically complex and consist mostly of formations of ultrabasic (or ultramafic) igneous (especially in the southern reaches), metamorphic, and sedimentary rock (particularly in the northern reaches) of more widely varying ages, with some formed as early as the (Pre)Cambrian [112, 115, 118, 120-122], including ophiolites, limestones, gabbro, and basalts, the majority of which are Mesozoic and later in age [118, 123, 124]. The  $^{87}\text{Sr}/^{86}\text{Sr}$  values of ophiolites in the Kızıldağ area have been measured as 0.705 [125], and the gabbro fields in the same region can be expected to have similarly low values, comparable to basalt. The southwestern areas of the Amanus range, however, in the area of the Hatay Graben, are composed mainly of carbonates with  $^{87}\text{Sr}/^{86}\text{Sr}$  values measured in the range of 0.7088-0.7090 [126]. Further north in the Amanus range, the

clastic and carbonate formations are generally older (dating from the Paleozoic and Mesozoic eras) [127] and can therefore be expected to yield higher  $^{87}\text{Sr}/^{86}\text{Sr}$  values compared to similar formations on the Arabian Platform to the south.

A strontium isotopes pilot study was conducted by D. Meiggs [128] at Tell Atchana which focused mainly on archaeological faunal and modern environmental samples, although three human samples were also included. The modern environmental samples included both snail shells (six samples) and plants (six samples) collected from various locations around the valley, including one snail shell directly from Tell Atchana (sample AK01), and several of the unanalyzed shells collected during this project were used in the current study in order to compare the two sets of results (for further details, see S2 Text). The  $^{87}\text{Sr}/^{86}\text{Sr}$  values of modern samples analyzed by Meiggs ranged from 0.707851-0.714678 with a mean of 0.708998 [128], with the widest variation in  $^{87}\text{Sr}/^{86}\text{Sr}$  values found in the samples from the Amanus Mountains (0.707851-0.714678), consistent with the varied geology encountered here. The samples from the alluvial plains of the valley floor showed comparatively lower  $^{87}\text{Sr}/^{86}\text{Sr}$  variation (from 0.707942-0.708330), irrespective of if they originated from the northern or southern part of the valley [128]. The snail shell from the tell (AK01: 0.708550) had a slightly higher strontium ratio than those from the plain floor, but was within the range of the ancient faunal samples. The archaeological faunal samples analyzed by Meiggs consisted of teeth from eight ovicaprids and two deer. They provide a much smaller range of  $^{87}\text{Sr}/^{86}\text{Sr}$  results, from 0.708196-0.70875, with a mean of 0.708396 [128]. This dataset therefore provides a local  $^{87}\text{Sr}/^{86}\text{Sr}$  range ( $\pm 2$  standard deviations from the mean) of 0.708073-0.708718 that likely indicates where strontium signatures of individuals growing up at Alalakh or in its direct vicinity could be expected to fall, although herding practices may have included the use of pastures located on different soils than those used for crop cultivation. In this case, the available ancient faunal samples may not provide a sufficient representation of variation expected in humans.

These considerations show that it is crucial to evaluate where the majority of the food consumed by the individuals under study came from: only if the bulk of the diet was produced locally – i.e., at or in the vicinity of the site where an individual lived – will the strontium isotopic signature allow conclusions about the place of residency, and therefore questions of dietary make-up and catchment must be taken into account [35, 129, 130]. The archaeobotanical evidence of Alalakh is dominated by free threshing wheat (*Triticum aestivum/durum*) and barley (*hordeum vulgare*) [131], although pulses also make up significant portions of the assemblage in certain contexts, including lentils (*Lens culinaris*), fava beans (*Vicia faba*), and chick pea (*Cicer arietinum*) [132]. The Amuq Plain is well-situated for growing these plants, as it lies within the Mediterranean climate region, and an annual mean of 500-700 mm of precipitation, combined with seasonal flooding, allows for rain-fed cereal agriculture on a large scale [115, 133]. The faunal remains recovered from the site consist primarily of domesticates, namely a mix of cattle, sheep/goat, and pig, while wild taxa make up a considerably smaller percentage in most strata [134], although reaching levels as high as 31% in some contexts [135]. This means most animals that were consumed were not roaming free within the Amuq Valley but were managed by people. Occasional consumption of freshwater fish and shellfish occurred, based on their presence in the zooarchaeological assemblage, but not in significant quantities [135]. This suggests that the majority of the daily dietary input of Alalakh's citizens could have been produced locally.

However, not all of the food present at Alalakh was produced in the immediate vicinity of the site: texts from the palace archives in Periods 7 (MB II) and 4 (LB I) describe regular shipments of food (including barley, emmer wheat, vetches, animal fodder, oil, beer, wine, and birdseed [e.g., texts ALT 236-308b, 320-328]) from Alalakh's vassal territories [55], and this non-local food, depending on where it was from and the bioavailable strontium of those areas, could have affected the strontium values of individuals who ate it. Most of the identified places where foodstuffs and animals were delivered from were within the control of Alalakh and seem

to have been from the Amuq Valley and its immediate environs, although Emar also delivered grain and sheep during Alalakh's sovereignty over that city in Period 7 [53], demonstrating that not all of the cities under Alalakh's sway were within the valley. It is unclear what the ultimate destination(s) of these received foodstuffs were – whether they were consumed by the palace denizens, redistributed to palace dependents, given as payment for services or against palace debts, or sold to other residents of Alalakh – but if certain portions of the population were consuming them in large proportions, this has the potential to change their  $^{87}\text{Sr}/^{86}\text{Sr}$  ratios and to artificially inflate the numbers of non-locals identified.

## DNA analysis background

The investigation and interpretation of genetic patterns of diversity between humans and groups of humans, usually referred to as populations, is one objective of the field of population genetics. One major factor that shapes genetic variation between populations is geographic distance, as groups living closer to each other are naturally more likely to admix – meaning that individuals are more likely to procreate – than groups living farther apart [136, 137]. Another major factor involved in shaping genetic variation is time, due to continuous human mobility on different scales. The interpretive power of a single-site study such as the current one strongly depends on the availability of already published data of coeval and earlier periods from the Amuq Valley and the wider Near East and Anatolia in general (see below). Furthermore, to securely detect changes in the local gene pool and identify outlier individuals or even different genetic clusters within one place, data from many individuals and archaeological contexts are necessary.

One major difficulty in genetic studies in connection with the identification of genetic outliers at a place concerns the dating of this signal. Often, when an outlier is identified, it is rather difficult to establish whether the sampled individual itself or his/her ancestors

immigrated. The combination of aDNA analysis with strontium and oxygen isotope analysis of the same individual is one way to resolve this issue, as migrants in the first generation can be identified, given the isotope signal in their teeth deviates from local baselines. On the other hand, the signal for a first-generation immigrant in the isotopic data can potentially be more closely refined by the aDNA data, due to the general geographic patterning of population genomic data. If an individual identified as a first-generation immigrant by isotopic analysis looks genetically very much like the other individuals at the site, it is likely that we are dealing with either regional/short distance migration or long-distance backwards migration.

In addition to the analysis of genetic ancestry between individuals within one site and between populations, aDNA analysis allows the detection of biological relationships amongst individuals. In some cases, pedigrees can be reconstructed from these [45, 138] which, from an archaeological point of view, can shed light on particular pedigree-related dynamics and practices at a site.

The earliest, and to date only, glimpse into the genetic makeup of the inhabitants of the Amuq Valley prior to Alalakh comes from six samples from Tell Kurdu, five of which date to the Early Chalcolithic between 5750-5600 BC, and one of which is dated to the Middle Chalcolithic, 5005-4849 cal BC (2 $\sigma$ ) [46]. Skourtanioti et al. [46] showed, with three different analyses (PCA,  $f_4$ -statistics, and  $qpAdm$ ), that the Chalcolithic samples from Tell Kurdu harbor ancestries related primarily to western Anatolia and secondarily to the Caucasus/Iran and the Southern Levant, suggesting a gradient of ancestries with geographical characteristics already in place during that time in the Amuq Valley [46]. However, the samples from the MBA and LBA from Alalakh draw a genetic picture of the Amuq that is considerably changed: roughly 3000 years after the last individual from Tell Kurdu, the individuals from Alalakh, along with individuals from EBA and MBA Ebla in northwestern Syria, are part of the same PC1-PC2 space with Late Chalcolithic-Bronze Age Anatolians. They are, compared to samples from Barcin in western Anatolia and Tell Kurdu, all shifted upwards on the PC2 towards samples of

Caucasus and Zagros/Iranian origin (Fig 9) [46]. This shift in ancestry was formally tested with  $f_4$ -statistics of the format  $f_4(\text{Mbuti}, \text{test}; \text{Barcin\_N/TellKurdu\_EC}, X)$ , which revealed that all the Late Chalcolithic-LBA populations from Anatolia and the northern Levant ( $X$ , i.e. Ebla and Alalakh) are more closely related to Iranian Neolithic individuals and/or Caucasus Hunter Gatherer individuals (*test*) than are the earlier Tell Kurdu and Barcin individuals [46]. A similar genetic shift towards Iranian/Caucasus-related populations was detected for contemporary Southern Levant [139-141]. This means that in the period between 5000–2000 BC, gene flow from populations harboring Iranian/Caucasus-like ancestries, which also includes populations that are genetically similar to these but have not yet been sampled, and are thus unknown, affected southern Anatolia and the entire Levant, including the Amuq Valley. It is currently neither possible to pinpoint the exact source population(s) that brought about these changes in the local gene pool nor to propose specific migration events.

**Fig 9. PCA: scatterplot of PC1 and PC2 calculated on West Eurasian populations (Human Origins dataset; grey symbols) using smartpca with projection of ancient individuals (colored symbols).**

Four genetic outlier individuals from Bronze Age Levantine contexts, one of them the so-called Well Lady from Alalakh (ALA019) and three from Megiddo (two of which are siblings), are shifted upwards on the PCA, the former towards individuals from Chalcolithic/Bronze Age Iran and Central Asia [46] and the latter to the Chalcolithic/Bronze Age Caucasus. Strontium isotope analysis of the two siblings from Megiddo suggests that both grew up locally [139]. These outlier individuals from Megiddo and Alalakh attest that gene flow from Caucasus/Iran (or genetically similar groups) into the Levant continued throughout the second millennium BC.

## Analytical methods

### Stable oxygen isotopes

Sampling protocols and analysis procedures for stable oxygen isotope analysis follow those set out in Roberts et al. [142] (see also [143-145]). Teeth were cleaned to remove adhering material using air-abrasion, and a diamond-tipped drill was used to obtain a powder sample. The full length of the buccal surface was abraded in order to capture a representative bulk sample from the maximum period of formation. To remove organic or secondary carbonate contamination, the enamel powder was pre-treated in a wash of 1.5% sodium hypochlorite for 60 minutes; this was followed by three rinses in purified H<sub>2</sub>O and centrifuging, before 0.1 M acetic acid was added for 10 minutes. Samples were then rinsed again three times with milliQ H<sub>2</sub>O and freeze dried for 4 hours. Enamel powder was weighed out into 12 ml borosilicate glass vials and sealed with rubber septa. The vials were flush filled with helium at 100 ml/min for 10 minutes. After reaction with 100% phosphoric acid, the CO<sub>2</sub> of the sample was analyzed using a Thermo Gas Bench 2 connected to a Thermo Delta V Advantage Mass Spectrometer at the Stable Isotope Laboratory, Department of Archaeology, MPI-SHH.  $\delta^{13}\text{C}$  and  $\delta^{18}\text{O}$  values were calibrated against International Standards (IAEA NBS 18 :  $\delta^{13}\text{C}$   $-5.014 \pm 0.032\text{‰}$ ;  $\delta^{18}\text{O}$   $-23.2 \pm 0.1\text{‰}$ , IAEA-603 [ $\delta^{13}\text{C}$   $= +2.46 \pm 0.01\text{‰}$ ,  $\delta^{18}\text{O}$   $-2.37 \pm 0.04\text{‰}$ ]; IAEA-CO-8 [ $\delta^{13}\text{C}$   $-5.764 \pm 0.032\text{‰}$ ,  $\delta^{18}\text{O}$   $-22.7 \pm 0.2\text{‰}$ ]; USGS44 [ $\delta^{13}\text{C}$   $= -42.1\text{‰}$ ]). Repeated analysis of MERCK standards suggests that machine measurement error is ca.  $\pm 0.1\text{‰}$  for  $\delta^{13}\text{C}$  and  $\pm 0.1\text{‰}$  for  $\delta^{18}\text{O}$ . Overall measurement precision was determined through the measurement of repeat extracts from a bovid tooth enamel standard ( $n = 20$ ,  $\pm 0.2\text{‰}$  for  $\delta^{13}\text{C}$  and  $\pm 0.3\text{‰}$  for  $\delta^{18}\text{O}$ ).

### Strontium isotopes



Sampling protocols and analytical procedures for strontium follow those set out in Copeland et al. [146]. Enamel powder was obtained with a diamond-tipped drill along the full length of the buccal surface after cleaning with air-abrasion. Up to 4 mg of enamel powder was digested in 2 ml of 65% HNO<sub>3</sub> in a closed Teflon beaker placed on a hotplate for an hour at 140°C, followed by dry down and re-dissolving in 1.5 ml of 2 M HNO<sub>3</sub> for strontium separation chemistry, which followed Pin et al. [147]. The separated strontium fraction was dried down and dissolved in 2 ml 0.2% HNO<sub>3</sub> before dilution to 200 ppb Sr concentrations for analysis using a Nu Instruments NuPlasma High Resolution Multi Collector Inductively Coupled Plasma-Mass Spectrometry (HR-MC-ICP-MS) at the Department of Geological Sciences, University of Cape Town. Analyses were controlled by reference to bracketing analyses of NIST SRM987, using a <sup>87</sup>Sr/<sup>86</sup>Sr reference value of 0.710255. Data were corrected for rubidium interference at 87 amu using the measured <sup>85</sup>Rb signal and the natural <sup>85</sup>Rb/<sup>87</sup>Rb ratio. Instrumental mass fractionation was corrected using the measured <sup>86</sup>Sr/<sup>88</sup>Sr ratio and the exponential law, along with a true <sup>86</sup>Sr/<sup>88</sup>Sr value of 0.1194. Results for repeat analyses of an in-house carbonate reference material processed and measured as unknown with the batches (<sup>87</sup>Sr/<sup>86</sup>Sr = 0.708909; 2 sigma 0.000040; n = 7) are in agreement with long-term results for this in-house reference material (<sup>87</sup>Sr/<sup>86</sup>Sr = 0.708911; 2 sigma = 0.000040; n = 414).

## **aDNA**

DNA data production of all nine newly sampled individuals in this study took place in the dedicated aDNA facility of the MPI-SHH in Jena, Germany. Sampling targeted the inner-ear part of the petrous bone [87]. DNA extraction and double-stranded genomic libraries were prepared for four samples (ALA118, ALA120, ALA123, and ALA124) according to the MPI-SHH Archaeogenetics protocols for Ancient DNA Extraction from Skeletal Material, and Non-UDG treated double-stranded ancient DNA library preparation for Illumina sequencing, both



archived and accessible at [dx.doi.org/10.17504/protocols.io.baksicwe](https://dx.doi.org/10.17504/protocols.io.baksicwe) and [dx.doi.org/10.17504/protocols.io.bakricv6](https://dx.doi.org/10.17504/protocols.io.bakricv6), respectively. The library preparation protocol was modified with the introduction of partial Uracil DNA Glycosylase (UDG) treatment prior to the blunt-end repair, according to Rohland et al. [148]. Dual-indexed adaptors were prepared according to the archived MPI-SHH Archaeogenetics protocol accessible at [dx.doi.org/10.17504/protocols.io.bem5jc86](https://dx.doi.org/10.17504/protocols.io.bem5jc86).

For the remaining five samples (ALA130, ALA131, ALA135, ALA136, and ALA138), DNA extraction was performed according to Rohland et al. [149], and single-stranded libraries (no UDG treatment) were prepared according to Gansauge et al. [150], both protocols using an automated liquid-handling system. All libraries were first shotgun sequenced (~5M reads) in a sequencing Illumina HiSeq4000 platform. Raw FastQC sequence data were processed through EAGER [151] for removal of adapters (AdapterRemoval [v2.2.0]) [152], read length filtering (>30b), mapping against hs37d5 sequence reference (BWA [v0.7.12]) [153], q30 quality filter, removal of PCR duplicates (dedup [v0.12.2]) [151], and DNA damage estimation (mapdamage [v2.0.6]) [154]. Two main characteristics of the sequenced reads were considered in order to select positive libraries for submission to an in-solution hybridization enrichment that targets 1,233,013 genome-wide and ancestry-informative single nucleotide polymorphisms (SNPs; “1240K SNP capture”) [155]. The first one is the proportion of DNA damage at the end of the reads (> ~5% C-T/ G-A substitution at terminal 5’ and 3’ base, depending on the UDG treatment of the library), and the second one is the content of endogenous DNA > 0.1%, the latter calculated as the portion of reads mapped against the hs37d5 reference over the total amount of sequenced reads after the length filtering. “Captured” libraries were sequenced at the order of ≥20M reads and the raw FastQC sequence data were processed through EAGER. We created masked versions of the bam files using trimBam ([https://genome.sph.umich.edu/wiki/BamUtil:\\_trimBam](https://genome.sph.umich.edu/wiki/BamUtil:_trimBam)) by masking the read positions with high damage frequency, that is the terminal 2 and 10 bases for the partially UDG-treated double-

stranded libraries, and single-stranded (no UDG) libraries, respectively. We used “samtools depth” from the samtools (v1.3) [156] on the masked bam files providing the bed file with the 1240K SNPs to calculate the coverage on X, Y, and autosomal chromosomes. X and Y coverage were normalized by the autosomal coverage (X-rate and Y-rate respectively), and females without contamination were determined by X-rate  $\approx 1$  and Y-rate  $\approx 0$ , whereas males without contamination were determined by both rates  $\approx 0.5$ . We used the original bam files in order to estimate mitochondrial contamination with Schmutzi [157] and the nuclear contamination on males with ANGSD (method 1) [158].

We called genotypes with the tool pileupCaller (<https://github.com/stschiff/sequenceTools/tree/master/src/SequenceTools>) according to the Affymetrix Human Origins panel (~600K SNPs) [159, 160] and the 1240K panel [155]. We used the option randomHaploid which randomly draws one read at every SNP position. We performed the random calling both on the original and the masked bam files of each double-stranded library, and, for the final genotypes, we kept transitions from the masked and from the original bam files. We used only the original bam files from the single-stranded libraries, and we applied the singleStrandMode option that removes reads with post-mortem damage based on their alignment on the forward or the reverse strand of the human reference genome. We report information about library processing, genetic sex, damage patterns, SNP coverage, and contamination in [Table 5](#).

**Table 5. aDNA data of new individuals from Alalakh published in this study.**

| Genomic Library ID | Library Type    | Library damage treatment | Genetic Sex | C-T substitution (damage) 1st 5' | C-T substitution (damage) 2nd 5' | N° of SNPs on 1240K panel | N° of SNPs on HO panel | mitochondrial coverage | mitochondrial contamination | nuclear contamination (only males) |
|--------------------|-----------------|--------------------------|-------------|----------------------------------|----------------------------------|---------------------------|------------------------|------------------------|-----------------------------|------------------------------------|
| ALA118. A0101      | double-stranded | partial UDG              | F           | 0.19                             | 0.02                             | 297638                    | 158546                 | 2.278                  | 0.09                        |                                    |

|                   |                     |                     |   |      |      |        |        |        |      |              |
|-------------------|---------------------|---------------------|---|------|------|--------|--------|--------|------|--------------|
| ALA120.<br>A0101  | double-<br>stranded | partial<br>UDG      | M | 0.14 | 0.02 | 931700 | 483857 | 14.888 | 0.01 | 0.004        |
| ALA123.<br>A0101  | double-<br>stranded | partial<br>UDG      | M | 0.15 | 0.02 | 713176 | 375066 | 13.237 | 0.02 | 0.005        |
| ALA124.<br>A0101  | double-<br>stranded | partial<br>UDG      | M | 0.15 | 0.02 | 443273 | 234343 | 10.153 | 0.01 | 0.001        |
| ALA130.<br>A0101  | single-<br>stranded | no UDG<br>treatment | F | 0.41 | 0.24 | 413322 | 218770 | 14.055 | 0.02 |              |
| ALA131.<br>A0101  | single-<br>stranded | no UDG<br>treatment | M | 0.45 | 0.26 | 270927 | 145335 | 5.060  | -NA- | 0.012        |
| ALA135.<br>A0101  | single-<br>stranded | no UDG<br>treatment | F | 0.37 | 0.20 | 488641 | 261023 | 4.541  | 0.03 |              |
| ALA136.<br>A0101* | single-<br>stranded | no UDG<br>treatment | M | 0.41 | 0.23 | 9814*  | 4991*  | 0.347  | -NA- | -NA-         |
| ALA138.<br>A0101  | single-<br>stranded | no UDG<br>treatment | M | 0.47 | 0.26 | 154627 | 82685  | 10.394 | 0.02 | 0.00868<br>6 |

\*Individual excluded from downstream population genetics analyses

Due to the low coverage of ALA136 (<1% of 1240K sites), we excluded this individual from downstream population genetics analyses. We combined the data from the remaining individuals with previously published ancient and modern individuals [46, 85, 141, 159, 161-190]. For readability, we kept most of the group labels used in Skourtanioti et al. [46], most importantly “Alalakh\_MLBA”, “ALA019” (genetic outlier) (n = 1), “Ebla\_EMBA” (n = 9), “K.Kalehöyük\_MLBA” (Kaman-Kalehöyük, n = 5), and “TellKurdu\_EC” (n = 5), but dubbed individuals from Sidon with the label “Sidon\_MBA” (instead of “Levant\_MBA”; n = 5). We performed principal component analysis on a subset of western Eurasian populations of the Human Origins Dataset using smartpca program of EIGENSOFT (v6.01) [191, 192] (default parameters and options lsqproject: YES, numoutlieriter:0) (see Fig 9).

We assessed the degree of genetic relationship among Alalakh\_MLBA individuals (n = 34 after quality filtering) by applying and comparing two different methods: READ [193] and *lcMLkin* [194]. Read is a software that can estimate up to second degree relationships from low-coverage genomes by calculating the proportion of non-matching alleles for a pair of individuals (PO) in non-overlapping windows of 1 Mbps. P0 was normalized with the median of P0 from all pairs – assuming that most pairs are unrelated – in order to reduce the effects of SNP ascertainment, within-population diversity, and marker density.

*LcMLkin* uses a Maximum Likelihood framework on genotype likelihoods from low-coverage DNA sequencing data and infers  $k_0$ ,  $k_1$ , and  $k_2$ , the probabilities that a pair of individuals share, respectively, zero, one or two alleles identical-by-descent (IBD), as well as the overall coefficient of relatedness ( $r$ ). Two useful aspects of this method are that it serves for distinguishing between parent-offspring ( $k_0=0$ ) and siblings ( $k_0 \geq 0$ , depending on recombination rate) and can infer relatedness down to the 5<sup>th</sup> degree. However, a discrepancy from the expected  $k_0$ ,  $k_1$ ,  $k_2$ , and  $r$  values can occur under scenarios of recent admixture, inbreeding, contamination, and low-quality data. We run *LcMLkin* on the masked bam files with the options -l phred and -g best.

We used *qpWave* and *qpAdm* programs from ADMIXTOOLS [160] for modelling of ancestry proportions, using the following set of Right populations (also named outgroups or references): Mbuti.DG, Ami.DG, Onge.DG, Mixe.DG, Kostenki14, EHG, Villabruna, Levant\_EP, and Barcin\_N. These programs compute a matrix of  $f_4$ -statistics for the Right and Left (targets for *qpWave* and target and sources for *qpAdm*) populations in the form of  $F_{ij}=F_4(L_i, L_j; R_1, R_j)$ . Then, with a likelihood ratio test, the null model is compared against the full-rank model in which all columns of the matrix are independent. In the latter model, the  $n$  Left populations relate with the references through  $n$  waves of ancestry, which for *qpAdm*, implies that the target cannot be explained as a combination of the selected source populations (null model). Depending on the chosen cutoff, a tested null model with p-value  $\leq 0.01$  or  $\leq 0.05$  and/or infeasible admixture coefficients (outside 0-1 range) is rejected. For this group-based analysis, we kept only individuals who are not genetically related.

## Results

### Results of oxygen isotope analysis

The 77 individuals analyzed yielded a mean  $\delta^{18}\text{O}$  of  $-5.2 \pm 0.9\text{‰}$  and a range of  $4.1\text{‰}$  (from  $-7.3 \pm 0.1\text{‰}$  to  $-3.2 \pm 0.1\text{‰}$ ; Fig 10, Table 4, S1 Table), with values clustering mainly between  $-6.0\text{‰}$  and  $-4.0\text{‰}$ . There are no statistically significant differences identified by one-way ANOVA test among the population according to age, sex, burial type/location/goods, archaeological period, etc.

## Fig 10. All $\delta^{18}\text{O}$ results.

Following recent suggestions that in-group statistical methods to identify outliers is a more reliable way of identifying non-locals within sets of  $\delta^{18}\text{O}$  values than ranges of variation, which have been shown to be ca.  $3\text{‰}$  within a population [40, 111], there are no clear statistical outliers among the Tell Atchana dataset. The five archaeological faunal samples (all from domestic animals; see Table 3) have a higher mean of  $-4.3 \pm 2.1\text{‰}$  and a wider range of  $5\text{‰}$  (from  $-2.2 \pm 0.05\text{‰}$  to  $-7.2 \pm 0.05\text{‰}$ ). This is due to two particularly high results from AT 0263 and AT 3064, a cattle and an unidentified sheep/goat, respectively. Nevertheless, the results of the humans and fauna are broadly compatible.

## Results of strontium isotope analysis

Every strontium isotope study is faced with the challenge of how best to establish the local bioavailable  $^{87}\text{Sr}/^{86}\text{Sr}$  range at the site under study. While two standard deviations from the mean have become common practice to set an objective cut-off to distinguish locals from non-locals [98], the material on which to base this mean is debated and varies between different studies. In this study, we used a mixed approach between ancient (snail shells, rodent teeth, sheep/goat teeth, and deer teeth) and modern faunal samples (snail shells) to establish (1) a local range for Alalakh and (2) a local range for the Amuq Valley in general, in order to be able to

distinguish between those human individuals that grew up at Alalakh (locals), those who came to the site from within the Amuq (micro-regional migration), and those originating from places outside the Amuq Valley (non-locals: migration over longer distances).

To estimate the typical local  $^{87}\text{Sr}/^{86}\text{Sr}$  signature for humans at Alalakh, we measured, in addition to the existing samples from sheep/goat and deer teeth [128],  $^{87}\text{Sr}/^{86}\text{Sr}$  ratios of five land snail shells and tooth enamel from two rodents from well-stratified archaeological contexts (see Table 3). As opposed to domesticates, rodents and snails are not managed by humans, and they obtain their food from within a small radius that should be representative for the strontium ratios available directly at the tell [195]. The snails and rodents offer a means to control whether the ovicaprines were grazing on pastures around Tell Atchana itself within the Amuq Valley, where the bulk of the humans' plant diet was likely produced, or whether the pastures were located on different geologies (in more mountainous areas on the fringes of the Amuq Valley). The  $^{87}\text{Sr}/^{86}\text{Sr}$  values of the ancient snail shells and rodents clustered closely together between 0.708111 and 0.708544 (Fig 11) and largely overlapped with the  $^{87}\text{Sr}/^{86}\text{Sr}$  ratios of the ovicaprines and deer from Meiggs' study [128], but, as expected, considering the differences in radius of movement, the ratios of the ovicaprines and deer have a wider range. Therefore, we can report positive results for the use of land snail shells as material to obtain bioavailable strontium signatures at Tell Atchana, contributing to a lively discussion in the literature where they have been used with varying success rates [195-201]. The snails and rodents confirm that herding practices of the ovicaprines mostly included pastures in the environs of Alalakh. Thus, the combination of the ovicaprines and deer, together with the two rodents, likely indicates the most relevant local range to represent locality in humans at Alalakh, returning a local range as two standard deviations from the mean (0.708401) of 0.708085-0.708717 (Table 6). By excluding the five snail shells from this calculation, we avoid a potential bias stemming from the snails' fixation to a very small radius on the tell that may be less representative for humans.

**Table 6. Comparison between possible local ranges.**

| Description                                                                                                                  | Mean            | Local Range (+/-2 SD)    | Comments                                                        |
|------------------------------------------------------------------------------------------------------------------------------|-----------------|--------------------------|-----------------------------------------------------------------|
| All ancient environmental samples from Alalakh (sheep/goat and deer teeth, n = 28)                                           | 0.708396        | 0.708073-0.708718        | Meiggs' study [128]                                             |
| All ancient environmental samples from Alalakh (5 snails, 2 rodents)                                                         | 0.708361        | 0.708104-0.708617        | this study                                                      |
| All ancient snail shells from Alalakh (n = 5)                                                                                | 0.708313        | 0.708081-0.708544        | this study                                                      |
| All ancient environmental samples of both studies (n=35)                                                                     | 0.708389        | 0.708077-0.708700        | Meiggs' study [128] and this study                              |
| <b>Ancient samples of sheep/goat, deer and rodents' teeth (n=30)</b>                                                         | <b>0.708401</b> | <b>0.708085-0.708717</b> | <b>Local range, Alalakh; Meiggs' study [128] and this study</b> |
| All modern environmental samples from Amuq Valley (snails and plants, n = 12)                                                | 0.708998        | 0.705400-0.712596        | Meiggs' study [128]                                             |
| Modern environmental samples from Amuq Valley, excluding pine needle outlier (Sample G4.4)                                   | 0.708482        | 0.707331-0.709632        | Meiggs' study [128]                                             |
| All modern snail shells from Amuq Valley (n = 6)                                                                             | 0.708285        | 0.707716-0.708855        | Meiggs' study [128]                                             |
| All modern snail shells (n = 9)                                                                                              | 0.708238        | 0.707420-0.709057        | including Haydarlar outlier; this study                         |
| <b>modern snail shells combined with mean of ancient snails (excluding Haydarlar outlier and AK01 from Alalakh) (n = 14)</b> | <b>0.708303</b> | <b>0.707739-0.708868</b> | <b>Local range, Amuq; Meiggs' study [128] and this study</b>    |
| 6 youngest individuals (0-6 years) from Alalakh                                                                              | 0.708340        | 0.708136-0.708544        | Humans, this study                                              |

**Fig 11.  $^{87}\text{Sr}/^{86}\text{Sr}$  ratios of snail, plant, fertilizer, and animal samples from this study and Meiggs [128]; continuous lines: mean; dotted lines:  $\pm 2$  SD from mean; dark grey lines: local range for Alalakh, calculated from sheep/goat, deer, and rodents' teeth; dark red lines: local range for the Amuq Valley, calculated from modern and ancient snail shells of both studies, using the mean of the five ancient snails from Alalakh as representative for**



**this location, and excluding the modern samples AK01 and the outlier from Haydarlar.**

**Note: sample G4.4 falls outside the ranges plotted in this graph and therefore appears blank.**

One way to check the accuracy of a local range obtained from the ancient faunal samples is by comparison against the  $^{87}\text{Sr}/^{86}\text{Sr}$  values of young children: the likelihood of individual mobility in sedentary societies should increase with age, so individuals dying at a young age are more likely to be local [200, 202-204]. All six individuals under the age of seven from Alalakh fall well inside the local range as determined by the archaeological fauna. In general, we believe that the range calculated from ancient faunal samples is representative for locality in humans, although in the case of individuals falling just outside this local range, we need to consider the option that these may only appear as outliers, if they were consuming larger portions of non-local diet as compared to other inhabitants.

The modern snail samples taken from throughout the valley provide the opportunity to compare the  $^{87}\text{Sr}/^{86}\text{Sr}$  values at the site with those from other locations in the Amuq Valley and serve to calculate a local range for the valley in general. The modern snail shells from our study ( $n = 9$ ) show a high consistency with the snail shells from Meiggs' study ( $n = 6$ ), with samples originating from the same geological units having similar  $^{87}\text{Sr}/^{86}\text{Sr}$  values across both studies. The plant samples from Meiggs' study, on the other hand, are generally characterized by either extremely high or low  $^{87}\text{Sr}/^{86}\text{Sr}$  values that cannot be explained by their location within the geological patchwork of the slopes of the Amanus mountains on the fringes of the Amuq Valley alone (for further discussion see S2 Text). We therefore decided to combine only the snail shells of both studies in our calculations of a local range for the Amuq Valley catchment area. The snail from Haydarlar, with the lowest  $^{87}\text{Sr}/^{86}\text{Sr}$  value (0.707376) among the modern snails, constitutes an outlier compared to all other modern snails. Haydarlar is located on alluvial deposits of the Kara Su river valley on the northernmost fringes of the Amuq Valley. We



conclude that the distinctly low isotopic signature of this snail stems from the basalt shields of Jurassic and Cretaceous age that are located along the slopes of the river valley, so that runoff water from these areas is naturally directed toward the riverbed and therefore impacts these adjacent areas, pulling the snail shell toward a lower  $^{87}\text{Sr}/^{86}\text{Sr}$  value (see also S3 Text) [195, 200]. This does not mean that the result should be considered incorrect, only that individuals growing up around this location may also have a comparable strontium signature that is distinctly lower than that of individuals from the rest of the Amuq Valley. We therefore excluded the snail shell from all further calculations of a local range for the Amuq Valley. Finally, we excluded the modern snail shell from Alalakh itself (sample AK01) and instead used the mean of the ancient snail shells ( $n = 5$ ), since we expect these to be a better representative for the local signature directly at the tell. With this method, we obtain a local range for the wider Amuq catchment area, based on 14 distinct data points, of 0.707739-0.708868, and a mean of 0.708303 that we see as best representing the strontium variation within the valley.

Applying the local range for Alalakh (0.708085-0.708717), out of a total of 53 human individuals, 40 plot within the range of Alalakh and another 8 plot outside the Alalakh range, but within the range for the Amuq Valley (0.707739-0.708868) (Fig 12; see also Table 4). Five individuals can be securely identified as non-locals to both Alalakh and the Amuq, plotting outside both local ranges (ALA110, ALA098, ALA037, ALA004, and ALA033). Nearly 10% of the sampled population (9.3%) is therefore identified as non-local to both Alalakh and the Amuq Valley.

**Fig. 12. All  $^{87}\text{Sr}/^{86}\text{Sr}$  results, plotted against local ranges. Black lines: local range calculated from ancient faunal samples from Alalakh; orange lines: local range calculated from modern snails from the Amuq and the mean of ancient environmental samples from Alalakh.**

All five non-local individuals were buried in the extramural cemetery, and four of the five are stratigraphically dated to Period 6 (ALA110 is dated to Period 7 and is one of the earliest graves excavated in Area 3; see Table 2). Three are female (two adults – ALA110 and ALA033 – and one of unknown age – ALA037), one is an adult male (ALA004), and one is of unidentified age and sex (ALA098). All three non-locals who have also been analyzed for oxygen isotopes (ALA110, ALA098, and ALA037) fall firmly within the range of local  $\delta^{18}\text{O}$  values (see Table 4), indicating that, while they are not from the Amuq Valley, they grew up in areas with similar  $\delta^{18}\text{O}$  values. Most interestingly, two of the five non-locals (ALA098 and ALA037) are secondary burials, as are secondarily buried individuals ALA048 and ALA099, two of those who likely came from within the Amuq Valley, rather than Alalakh itself (see Fig 12). In fact, only one of the sampled secondary burials (ALA060) falls within the local range for Alalakh (see Fig 12). In order to explore the timing of the migration of these non-locals, M3s were also analyzed when they were available, which returned a range of resulting patterns (see Fig 12). Like the M2 (0.707851), the M3 of ALA048 (0.708032) still falls within the group identified as local to the Amuq, but substantially closer to the Alalakh range, indicating that the move from within the Amuq to Alalakh may have occurred late during the formation of the M3 (likely during the end of childhood/early adolescence), leading to this mixed signal. The M3 of ALA110 (0.708303) falls firmly within any local range calculated here and clearly shows that this woman moved to Alalakh in later childhood – i.e., between the formation of M2 and M3. ALA098, however, has similar  $^{87}\text{Sr}/^{86}\text{Sr}$  values for both M2 (0.706801) and M3 (0.706755), both of which fall at the lowest end of the results reported here. It therefore appears that this individual spent their entire childhood and youth in another location, moving to Alalakh only in adulthood.

Out of the three human individuals sampled in Meiggs' study [128], two were analyzed again in this study (002\_Meiggs = ALA002 and 003\_Meiggs = ALA003). While both samples

from individual ALA002 have similar  $^{87}\text{Sr}/^{86}\text{Sr}$  ratios, ALA003 in Meiggs' study has a higher  $^{87}\text{Sr}/^{86}\text{Sr}$  ratio and plots outside the local range calculated here, as does the third human sample from Meiggs's study (AT 11979). Unfortunately, the teeth sampled by Meiggs were only identified to the level of molars, and, given the discrepancy between the M2 value obtained here and the one published by Meiggs [128], it is likely that the tooth sampled in Meiggs' study was either an M3 or an M1. In this case, the difference in the  $^{87}\text{Sr}/^{86}\text{Sr}$  ratio between the two samples from ALA003 would be explained by changes in the origins of food that could ultimately be linked to a change in place of residency during childhood. While a sample from an M1 would mean that ALA003 spent the first years of her life outside of Alalakh, a sample from the M3 would hint at a move away from Alalakh during later childhood/early adolescence and, consequently, a return to Alalakh later.

## Results of aDNA analysis

All individuals sampled from Alalakh, regardless of their context, are very homogeneous from a population genomics perspective, with only one exception (ALA019). As described above (see Table 4), the individuals cover all ages (ca. 40 weeks-75 years at death) and both sexes, as well as all burial contexts available for analysis. It is reasonable to assume, therefore, that the genomic data from Alalakh accurately describes the genetic variation within the bulk of the MBA-LBA population from Alalakh. Published data from other contemporary Levantine and Anatolian sites shows that most individuals cluster relatively close to each other in the PCA on a north-south cline, and their overall genetic differences are small [46, 140, 141, 161], yet detectable. Therefore, with the help of *qpAdm* modeling, we can explore the role of Alalakh as an intermediary on this cline between contemporaneous individuals from sites located to the north in Anatolia and to the south in present day Lebanon [205]. For modeling, we have chosen individuals dating to the MBA and LBA from Kaman-Kalehöyük (n = 5 [161])

as a representative for central Anatolian groups and from Sidon (n = 5 [141]) as a representative for Levantine individuals to the south of Alalakh.

As – at least for the Amuq Valley and the Southern Levant – there was gene flow during and/or after the Chalcolithic period, we tested models that used temporally proximal sources from Anatolia, Iran, the Caucasus, and the Southern Levant (Fig 13 and S2 Table). The results of this modeling show that Alalakh\_MLBA (n = 31) can be adequately modeled as a three-way admixture model between an Anatolian (“Büyükkaya\_Ch1”), a Levantine (“Levant\_Ch1”), and an Iranian (“Iran\_Ch1”) source (pval = 0.28), while for Sidon\_MLBA, the two-way admixture model of Levant\_Ch1 and Iran\_Ch1 provides the best fit (pval = 0.037). Three-way models fail for Sidon\_MLBA (pval < 0.01 or negative coefficients) (see Fig 13). While the same admixture model for Alalakh applies to Ebla\_EMBA, with a lower Büyükkaya\_ECh1 ancestry coefficient, nested models such as Iran\_Ch1 (47.2±2.6%) + Levant\_Ch1 (52.8±2.6%) also become adequate (p ≥ 0.5). The fit of simpler models for Ebla might be a result of lower statistical power to distinguish between the model and actual targets, due to their smaller sample size and/or coverage compared to Alalakh.

**Fig 13. Admixture modeling (*qpAdm*) of Alalakh\_MLBA, Ebla\_EMBA, K.Kalehöyük\_MLBA, and Sidon\_MBA using Chalcolithic and Bronze Age source populations. Source proportions are plotted with -1SE. Abbreviations: E = early, M = middle, L = late, BA = Bronze Age, Ch1 = Chalcolithic.**

Overall, these models provide adequate descriptions for the positioning of the individuals from Alalakh, excluding outlier ALA019, on the PCA in between contemporary Anatolian and central/southern Levantine individuals by breaking their ancestry down to three major components of Anatolian, Levantine, and eastern origin. For Alalakh, Ebla, and Sidon, models fit better with Iranian than Caucasus sources. However, when the Tell Kurdu population

is used instead of Büyükkaya as a geographically proximal source, models with Caucasus sources fit better for Alalakh when Levant\_EBA is used as a third source instead [46]. Therefore, a clear distinction between possible source populations from an eastern (Iranian) or northeastern (Caucasus) source is not yet possible with the data available. Sources to the east/southeast (northern and southern Mesopotamia) also need to be considered here, but these remain completely unsampled as of yet. The existing gaps in available genomic data touch on yet another important issue when performing admixture modeling: the individuals we group together here to represent ‘source populations’ need to be seen as mere proxies. We do not suggest that any of these groups are the actual source for admixture events. Indeed, based on archaeological and textual evidence, populations from northern Mesopotamia are among the likely genetic sources at Alalakh, especially the Hurrians and the Amorites, both groups known from texts to have been on the move in the region in the third and second millennia BC and which are attested in considerable numbers in the Alalakh texts [46, 53-55, 206-212].

## Kinship analysis

READ computed on the total of 35 individuals from Alalakh successfully assigned pairs ALA011-ALA123 and ALA001-ALA038 as first degree related and pair ALA002-ALA038 as second degree related (Fig 14). The latter two cases are individuals from the Plastered Tomb and are reported in Skourtanioti et al. [46]. However, the genetic relatedness between ALA001 and ALA002 remains unresolved with this method, as the estimated  $P_0$  for this pair lies within the 95% confidence interval of the second-degree cutoff, but surpasses it in the +2 SE, and therefore either a second or higher degree are possible. Plotting  $r$  against  $k_0$  estimated by *lcMLkin* clusters pairs in three main groups that correlate with the result of READ: pairs ALA011-ALA123 and ALA001-ALA038, pairs ALA002-ALA038 and ALA001-ALA002, and all the other unrelated pairs ( $r \approx 0$ ) (Fig 15). For all related pairs,  $r$  is lower than expected,

as suggested by the comparison with the degrees assigned by READ and by  $r = 0.9$  between two different genomic libraries generated from the same individual (ALA039). Underestimation of  $r$  can be attributed to the lower quality of ancient data and has been reported before in Mitnik et al. [45], where genetic relatedness was explored in a large set of ancient individuals. However, the clustering of pairs ALA002-ALA038 ( $r = 0.16$ ) and ALA001-ALA002 ( $r = 0.12$ ) indicates that the latter most likely also represents a second-degree relationship. Interestingly, the two first-degree pairs ALA011-ALA123 and ALA001-ALA038 have both  $r = 0.39$  but differ in the  $k_0$ , and hence, suggesting a sibling-sibling and a parent-offspring relationship, respectively.

#### **Fig 14. Kinship analysis with READ**

#### **Fig 15. Kinship analysis with *lcMLkin***

Altogether, therefore, kinship in the first and second degree can be securely identified between five individuals from Alalakh. In all cases, the deceased were buried in close spatial proximity to one another. Individuals ALA011 and ALA123, two small children who were buried next to each other inside a casemate of the Area 3 fortification wall [76, 84] are first degree relatives, making them direct siblings. The other three individuals come from the Plastered Tomb and are discussed further below.

## **Discussion**

The aDNA analysis from Tell Atchana revealed that the sampled individuals are genetically very homogeneous – with the exception of ALA019 – and that the common ancestry at Alalakh was widespread over a larger area which stretched southeastward at least until Ebla. Consequently, aDNA's resolution for scenarios of micro-regional migration might be limited.

The genetic homogeneity of the samples from Alalakh suggests that the recent ancestors of most individuals came from within the wider Amuq-Ebla region, rather than beyond, which conforms well with the overall strontium and oxygen isotopic results that indicate a local upbringing within the Amuq Valley for the majority of sampled individuals.

Though the oxygen isotopic results are relatively homogenous, the strontium results are generally more informative. These suggest an overall population structure at the site during the MBA-LBA that was made up of a majority of people from the city itself. Based on the ancient faunal samples from Alalakh, we estimate that 40 individuals came from the city itself. The modern snail shells revealed that strontium ranges for many other locations within the Amuq Valley are comparable to those from Alalakh. This means we need to reckon with the possibility that a substantially larger portion of people than the eight that fall outside the Alalakh range but within the range calculated for the Amuq Valley originated within the Amuq Valley from sites other than Alalakh. Five individuals (9.4%) are identified as non-local to the whole Amuq Valley on the basis of the modern snail shells, one of which (ALA110) apparently moved to Alalakh during later childhood, resulting in the different  $^{87}\text{Sr}/^{86}\text{Sr}$  ratios between M2 and M3 (see Fig 12, Table 4).

The only correlation between non-locals and any contextual variable such as burial location, type, or date, is the association of secondary burials with non-local individuals. One of these non-locals (ALA098) was found together as part of a secondary burial consisting only of three mandibles. The other two mandibles, ALA048 and ALA099, are as local to the Amuq, but not Alalakh. It therefore seems that all three of these individuals were born outside of Alalakh, although ALA048 and ALA099 seem to have grown up in the Amuq Valley. The wide separation between their  $^{87}\text{Sr}/^{86}\text{Sr}$  values, however, indicates that all three spent their childhoods in different places (ALA098 = 0.706801; ALA048 = 0.707851; ALA099 = 0.707977), despite being buried together.

There are several potential explanations for this relationship between non-locals and secondary burials, not all of which are mutually exclusive. The most straightforward explanation is that these individuals moved to Alalakh at some point during their lives and then died and were buried there. If secondary burial was a stronger tradition in the area(s) where these individuals originally came from, it is possible that their families chose secondary burial for this reason, even though it was a minority practice at Alalakh itself [76, 77, 79]. However, given the nature of secondary burial, there are other possibilities. These individuals may have moved to Alalakh during their lifetimes, and, following their deaths, the majority of their remains could have been transferred back to their original settlement(s) for burial, with only parts of them remaining at Alalakh for burial. Alternatively, these individuals could have lived their entire lives elsewhere, but, after death, parts of the deceased could have been brought to Alalakh for burial, perhaps as a result of its status as a regional cult center [74, 75]. People who were able to do so may have chosen to inter a portion of their family's remains at the cult center for a variety of reasons, including gaining favor from the gods, in order to raise their social standing, or because they were ritual specialists who were expected and entitled to do so.

Genomic data exists for only two (ALA037 and ALA004) of the five  $^{87}\text{Sr}/^{86}\text{Sr}$  non-locals. Both individuals, ALA037 and ALA004, share the same genetic profile as the other individuals from Alalakh. There are two possible explanations for this pattern: both individuals could have come to Alalakh from a distance that is outside the Amuq but still within the wider Alalakh-Ebla catchment area, as the genomic data suggests, or this may be a case of backwards migration – the parents or grandparents of ALA037 and/or ALA004 could have emigrated from the area around the Amuq, ALA037 and ALA004 consequently spending their childhood elsewhere, but later coming back to Alalakh and subsequently dying there. As the ancestors of ALA004 and ALA0037 would have originated from the Amuq region in this scenario, their genetic profile matches the other individuals sampled from Alalakh.



## The case of the Well Lady (ALA019)

Aside from the bulk of genetic data from Alalakh that suggests regional ties over many generations, there is one outstanding case of long-distance mobility. Individual ALA019 – the Well Lady – takes up an extreme outlier position in the PCA closest to sampled individuals from Bronze Age Iran/Turkmenistan/Uzbekistan/Afghanistan, which can be confirmed with *outgroup*  $f_3$  statistics [46]. While it is impossible to say exactly where to the east or northeast this individual (and/or her ancestors) came from, especially in the absence of data from nearby eastern regions like Mesopotamia, it is clear from the genetic data that either this individual or her recent ancestors migrated to the Alalakh region. The strontium isotope data allows us to narrow down the possibilities, and it seems that the Well Lady herself did not migrate, but rather her ancestors, as the  $^{87}\text{Sr}/^{86}\text{Sr}$  ratios of all three molars sampled (M1, M2, and M3) fall within even the most narrowly defined local range for Alalakh (see Fig 12); however, due to a lack of research on bioavailable strontium isotopes in the Central Asian areas where the PCA suggests she came from, it is not currently possible to definitively rule out a childhood spent in these regions. A scenario in which she was part of a pastoral community that frequently came into contact with inhabitants of the Amuq Valley is unlikely, due to the low variation in all three  $^{87}\text{Sr}/^{86}\text{Sr}$  values (M1 = 0.708456; M2 = 0.708474; M3 = 0.708540). The case of the Well Lady is therefore particularly interesting, not only because it is the only genetic outlier in a dataset of 37 individuals (if we add the Ebla data on top of that, in a dataset of 48 individuals), but also because the strontium evidence is consistent with her having spent her whole life at Alalakh; however, despite likely being a local of Alalakh, she did not receive a proper burial, instead found face down at the bottom of a well, with extremities splayed, indicating that she was thrown into the well.

The presence of this genetic outlier at Alalakh is generally not surprising, given the extensive genetic, archaeological, and textual evidence for long-distance contacts between both

people and polities in the second millennium BC, and it is doubtful that she was the only such outlier present in the city throughout its history, especially considering that she herself was apparently not migratory. Indeed, dental morphology of the Well Lady shows shoveling of I2 [213], a feature which is passed down genetically and is shared by three other individuals – 42.10.130, buried in the Royal Precinct, ALA012, buried in the extramural cemetery, and ALA139, buried in the Area 4 cemetery – as well as ALA030 (the accident victim found in Area 3), ALA132, and ALA133 (both buried in the Area 4 cemetery), although the trait is less pronounced in these latter three individuals. Of these six individuals, only ALA030 has thus far yielded sufficient aDNA preservation, and this individual is not a genetic outlier among the Alalakh population. It is possible, therefore, that the former three individuals, which show pronounced I2 shoveling, may also be genetic outliers, similar to the Well Lady.

## **The Plastered Tomb: evidence for local elites with kinship ties**

The Plastered Tomb is the most elaborate, elite grave at Alalakh, judging from the grave construction and the richness of the burial goods [82]. While isotopic data could be generated for all four individuals in the tomb, genetic analysis only succeeded in three cases (ALA001, ALA002, and ALA038; ALA003 did not yield preserved aDNA), but this data illuminates the kinship ties between these individuals.

The four individuals buried in the Plastered Tomb were spatially arranged in three different layers atop each other, separated by plastering (Fig 16A). From a construction viewpoint, it is clear that the lowest two individuals, ALA001 and ALA003, were deposited first, and then the plastering over them was laid, sealing both bodies. On top, arranged above one another and separated by plastering, were put individuals ALA002 and ALA038. ALA038 was, furthermore, placed in a wooden coffin (unpreserved, but attested by wood impressions in the plaster surrounding it) [77, 82]. While this general order of interments is clear [82], the time

interval between each burial is not – there could have been between one to up to four separate events; the semi-disarticulated state of ALA003's remains [80] suggests that even the lowest two individuals may not have originally been placed in the grave at the same time.

**Fig 16. The Plastered Tomb: A) schematic representation of the spatial setting of the four individuals within the grave after Yener [82]; B) osteological and genetic information of the Plastered Tomb individuals, including biological kinship; C) family tree.**

Osteological analyses concluded that three individuals in the grave were likely female and one individual (ALA001) male. ALA002 was tentatively ascribed as female on the basis of pelvic and cranial morphology and post-cranial robusticity [80, 81]. Genetic sexing has now revealed that this individual was actually male, which changes the arrangement of the tomb to an even sex ratio (2:2) [46]. According to the most recent analysis by R. Shafiq, the male individuals were estimated to have died at an age of 40-45 years (ALA001) and 19-21 years (ALA002); the two females were between 40-45 (ALA003) and 35-45 (ALA038) years old at death.

Multiple burials are common in the whole Levantine and Mesopotamian area during the MBA and LBA and are often associated with family burials, so even before genetic analysis, it was expected that these four individuals were related in some way [82]. The genetic data confirms, on the basis of READ [193] and *lcMLkin* [194], that all three successfully DNA sequenced individuals were biologically related (Fig 16B) [46]. None of them share the same mitochondrial haplogroup, which is exclusively passed on from mother to offspring. This means that first-degree relatives ALA001 and ALA038 are father and daughter, confirming the k0-based distinction of *lcMLkin* from siblings ALA011-ALA123. ALA002 must therefore be the nephew of ALA038 and the grandson of ALA001, linked to ALA001 via the male line, as they do not share the same mt-haplogroup but have the same Y-haplogroup (Fig 16C).

Stratigraphically, the tomb belongs to Period 4 at Alalakh and can be dated on the basis of the grave goods to the 15<sup>th</sup> century BC [82, 214]. The radiocarbon dates of ALA001, ALA002, and ALA038 all confirm this dating. Furthermore, the combination with the kinship and osteological data enables a more precise dating: the overlap in date ranges from 1498-1452 BC between ALA001 and ALA038 – father and daughter, and both adults in their thirties or forties at their age of death – can be used to place them more precisely in time: both must have died during the first half of the 15<sup>th</sup> century BC. The death of the grandson/nephew ALA002 would then be at the very latest during the first decades of the second half of the fifteenth century BC.

Examining these individuals as a group on a population genomics level shows that they cluster together with all other individuals from Alalakh and Ebla, excluding the Well Lady. Isotopic analysis confirms that ALA001, ALA002, and ALA038 likely grew up at Alalakh, while the difference in the strontium ratio of the two samples from ALA003 could indicate that this individual moved to Alalakh from within the Amuq Valley during early childhood (if an M1 was sampled by Meiggs [128]). Although it was not possible to generate genetic data for ALA003, her presence in the lower layer of the tomb and the semi-disarticulated state of her remains [80] suggest that she was also a part of this family group and was likely either from the same generation as ALA001 (perhaps his wife and/or his sister?) or an earlier one (perhaps his mother?). There are therefore selected members of at least three, possibly four, generations of a local, elite family buried in this unusual tomb that was so richly constructed and appointed and would have been so prominent outside the city wall [77, 82] – a unique tomb constructed for, and likely by, local elites as a potent symbol of their social status and power.

## Conclusions

Our investigation of the burial corpus at Alalakh via strontium and stable oxygen isotopic analysis, combined with both published [46] and new aDNA results, sheds light on aspects of human mobility at an urban center in the northern Levant during the MBA and LBA. The various lines of evidence reveal that most individuals grew up locally, with different levels of mobility, from long-distance to regional, indicated for a smaller number of individuals. We used overlap in datasets to refine signals for mobility, most notably by limiting the likely distance of the migrations. The strontium isotope data, due to its better refinement in outlier identification than the stable oxygen isotope data and to the different level it operates on than the aDNA data, proved to be best-suited for estimating numbers of non-locals and was even able to reveal that the Well Lady, though a remarkable genetic outlier, may have been local to Alalakh. Long-distance migration of the type demonstrated by this individual's ancestors appears (at least from the data currently available) to be rather rare.

The arising picture from Alalakh's population with regard to mobility is complex and cannot be easily paralleled with certain burial traditions, with the exception of secondary burial, which is associated with non-local individuals. As the case of the Well Lady indicates, though, we may be missing entire portions of the population due to their non-recovery for a variety of possible reasons. This example highlights how the vagaries of discovery and issues of representativeness influence mobility studies, and it is important to keep in mind that only a small portion of the total number of ancient inhabitants of the city has been recovered to date and is available for sampling. Nevertheless, this study has revealed multiple scales and levels of mobility at Alalakh in the Middle and Late Bronze Age, and shows, as have other recent studies in the ancient Near East [139, 141, 215], that the majority of sampled individuals were locals who likely lived, died, and were buried in close proximity to the place where they were born. This has important implications for understanding individual mobility in the Near Eastern Bronze Age: while such mobility is documented at relatively high levels both textually and archaeologically, it seems that – within the range and limitations the methods discussed here

are able to determine – relatively few individuals were buried away from their homes. The majority of cases of long-distance mobility may therefore have been on a temporary basis, for the duration of a diplomatic mission or a specific crafting commission, for example, rather than permanent relocations.

## Acknowledgments

The analyses presented here were carried out under the auspices of the Max Planck-Harvard Research Center for the Archaeoscience of the Ancient Mediterranean (MHAAM) and the European Research Council’s (ERC) European Union’s Horizon 2020 research innovation programme (ERC-2015-StG 678901-Food-Transforms). Oxygen isotope analysis was conducted at the Max Planck Institute for the Science of Human History (MPI-SHH) in Jena, Germany under the supervision of P. Roberts and J. Ilgner; strontium isotope analysis was conducted at the University of Cape Town under the supervision of P. J. Le Roux; and aDNA analysis was conducted at MPI-SHH under the supervision of J. Krause, G. Brandt, and A. Wissgot. All contextual data, including site maps, is courtesy of the Alalakh Excavations project, and all skeletal data is courtesy of R. Shafiq. All necessary permits were obtained for the described study, which complied with all relevant regulations.

## Author contributions

Tara Ingman: Conceptualization, data curation, formal analysis, investigation, methodology, project administration, visualization, writing – original draft, writing – review & editing  
Stefanie Eisenmann: Conceptualization, data curation, formal analysis, investigation, methodology, project administration, visualization, writing – original draft, writing – review & editing

- 1041 Eirini Skourtanioti: Methodology, Conceptualization, data curation, investigation, Writing –  
 1042 Original draft Preparation, Writing – Review and Editing  
 1043 Murat Akar: Conceptualization, Writing – Review and Editing  
 1044 Jana Ilgner: Investigation, Data Curation, Validation  
 1045 Guido Alberto Gnechi Ruscone: Investigation, Data Curation  
 1046 Petrus le Roux: Investigation, Data Curation, Validation  
 1047 Rula Shafiq: Data Curation, Investigation, Resources  
 1048 Gunnar U. Neumann: Investigation, Resources  
 1049 Marcel Keller: Investigation, Resources  
 1050 Căcilia Freund: Investigation, Data Curation, Validation  
 1051 Sara Marzo: Investigation, Data Curation, Validation  
 1052 Mary Lucas: Investigation, Data Curation, Validation  
 1053 Johannes Krause: Funding Acquisition, Supervision  
 1054 Patrick Roberts: Conceptualization, Supervision, Investigation, Validation, Methodology,  
 1055 Writing – Review and Editing  
 1056 K. Aslıhan Yener: Conceptualization, Supervision, Writing – Review and Editing  
 1057 Philipp W. Stockhammer: Conceptualization, Funding Acquisition, Supervision, Writing –  
 1058 Review and Editing

1059

## 1060 **References**

- 1061 1. Akkermans PMMG, Schwartz GM. The Archaeology of Syria: From Complex  
 1062 Hunter-Gatherers to Early Urban Societies (c. 16,000-300 BC). Cambridge: Cambridge  
 1063 University Press; 2003.  
 1064 2. Aruz J, Benzel K, Evans JM, editors. Beyond Babylon. Art, Trade, and Diplomacy in  
 1065 the Second Millennium B.C. New York: The Metropolitan Museum of Art; 2008.

- 1066 3. Barjamovic G. The Geography of Trade. Assyrian Colonies in Anatolia c. 1975-1725  
1067 BC and the Study of Early Interregional Networks of Exchange. Anatolia and the Jazira  
1068 during the Old Assyrian Period PIHANS 2008(111):87-100.
- 1069 4. Feldman MH. Diplomacy by Design. Luxury Arts and an “International Style” in the  
1070 Ancient Near East, 1400-1200 BCE. Chicago: University of Chicago Press; 2005.
- 1071 5. Klengel H. Syria: 3000 to 300 B.C. A Handbook of Political History. Berlin:  
1072 Akademie Verlag; 1992.
- 1073 6. Liverani M. The Ancient Near East. History, Society and Economy. London:  
1074 Routledge; 2014.
- 1075 7. Sherratt A, Sherratt S. From Luxuries to Commodities: The Nature of Mediterranean  
1076 Bronze Age Trading Systems. In: Gale N, editor. Bronze Age Trade in the Mediterranean.  
1077 SIMA. Jonsered: Paul Astroms Forlag; 1991.
- 1078 8. Pulak C. The Uluburun Shipwreck: An Overview. The International Journal of  
1079 Nautical Archaeology. 1998;27(3):188-224.
- 1080 9. Zaccagnini C. Patterns of Mobility among Ancient Near Eastern Craftsmen. Journal of  
1081 Near Eastern Studies. 1983;42(4):245-64.
- 1082 10. Sasson JM. Instances of Mobility among Mari Artisans. Bulletin of the American  
1083 Schools of Oriental Research. 1968;190:46-54.
- 1084 11. Beckman G. Hittite Diplomatic Texts. Atlanta: Scholars Press; 1996.
- 1085 12. Campbell J, Edward F. The Amarna Letters and the Amarna Period. The Biblical  
1086 Archaeologist. 1960;23(1):1-22.
- 1087 13. Michel C. Old Assyrian Bibliography of Cuneiform Texts, Bullae, Seals and the  
1088 Results of the Excavations at Aššur, Kültepe/Kaniš, Acemhöyük, Alişar, and Boğazköy.  
1089 Leiden: Nederlands Instituut voor het Nabije Oosten; 2003.



- 1090 14. Perry MA, Coleman, Drew S., Dettman, David L., and al-Shiyab, Abdel Halim. An  
1091 Isotopic Perspective on the Transport of Byzantine Mining Camp Laborers into Southwestern  
1092 Jordan. *American Journal of Physical Anthropology*. 2009;140:429-41.
- 1093 15. Perry MA, Coleman, Drew, and Delhopital, Nathalie. Mobility and Exile at 2nd  
1094 Century A.D. Khirbet edh-Dharih: Strontium Isotope Analysis of Human Migration in  
1095 Western Jordan. *Geoarchaeology*. 2008;23(4):528-49.
- 1096 16. Perry MA, Coleman DS, Dettman DL, Al-Shiyab AH. Condemned to *Metallum*?  
1097 Illuminating Life at the Byzantine Mining Camp at Phaeno in Jordan. In: Perry MA, editor.  
1098 *Bioarchaeology and Behavior The People of the Ancient Near East*. Gainesville, FL:  
1099 University Press of Florida; 2012. p. 115-37.
- 1100 17. Perry MA, Jennings C, Coleman DS. Strontium Isotope Evidence for Long-Distance  
1101 Immigration into the Byzantine Port City of Aila, Modern Aqaba, Jordan. *Archaeological and*  
1102 *Anthropological Sciences*. 2017;9:943-64.
- 1103 18. Sheridan SG, Gregoricka LA. Monks on the Move: Evaluating Pilgrimage to  
1104 Byzantine St. Stephen's Monastery Using Strontium Isotopes. *American Journal of Physical*  
1105 *Anthropology*. 2015;158:581-91.
- 1106 19. Mitchell PD, Millard AR. Migration to the Medieval Middle East with the Crusades.  
1107 *American Journal of Physical Anthropology*. 2009;140:518-25.
- 1108 20. Al-Shorman AaE-K, Lamia. Strontium Isotope Analysis of Human Tooth Enamel  
1109 from Barsinia: A Late Antiquity Site in Northern Jordan. *Archaeological and Anthropological*  
1110 *Sciences*. 2011;3:263-9.
- 1111 21. Buzon MR, Simonetti, Antonio, and Creaser, Robert A. Migration in the Nile Valley  
1112 During the New Kingdom Period: A Preliminary Strontium Isotope Study. *Journal of*  
1113 *Archaeological Science*. 2007;34:1391-401.
- 1114 22. Buzon MR, and Simonetti, Antonio. Strontium Isotope ( $^{87}\text{Sr}/^{86}\text{Sr}$ ) Variability in the  
1115 Nile Valley: Identifying Residential Mobility During Ancient Egyptian and Nubian

- 1116 Sociopolitical Changes in the New Kingdom and Napatan Periods. *American Journal of*  
1117 *Physical Anthropology*. 2013;151:1-9.
- 1118 23. Nafplioti A. Late Minoan IB Destructions and Cultural Upheaval on Crete: A  
1119 Bioarchaeological Perspective. In: Kaiser E, Burger J, Schier W, editors. *Population*  
1120 *Dynamics in Prehistory and Early History: New Approaches using Stable Isotopes and*  
1121 *Genetics*. TOPOI Berlin Studies of the Ancient World. Berlin: de Gruyter; 2012. p. 241-63.
- 1122 24. Nafplioti A. "Mycenaean" Political Domination of Knossos Following the Late  
1123 Minoan IB Destructions on Crete: Negative Evidence from Strontium Isotope Ratio Analysis  
1124 ( $^{87}\text{Sr}/^{86}\text{Sr}$ ). *Journal of Archaeological Science*. 2008;35:2307-17.
- 1125 25. Nafplioti A. Mycenae Revisited Part 2. Exploring the Local Versus Non-Local  
1126 Geographical Origin of the Individuals from Grave Circle A: Evidence from Strontium  
1127 Isotope Ratio ( $^{87}\text{Sr}/^{86}\text{Sr}$ ) Analysis. *The Annual of the British School at Athens*. 2009;104:279-  
1128 91.
- 1129 26. Wang X, Zhang X, Fan A, Sampson A, Wu X, Gao J, et al. Strontium Isotopic  
1130 Evidence for the Provenance of Occupants and Subsistence of Sarakenos Cave in Prehistoric  
1131 Greece. *Quaternary International*. 2019;508:13-22.
- 1132 27. Yazıcıoğlu Santamaria GB. Locals, Immigrants, and Marriage Ties at Kültepe: Results  
1133 of Strontium Isotope Analysis on Human Teeth from Lower Town Graves. In: Kulakoğlu F,  
1134 Barjamovic G, editors. *Movement, Resources, Interaction: Proceedings of the 2nd Kültepe*  
1135 *International Meeting, Kültepe 26-30 July 2015*. Turnhout: Brepols; 2017. p. 63-84.
- 1136 28. Yazıcıoğlu Santamaria GB. *The People of Kanesh: Residential Mobility, Community*  
1137 *Life, and Cultural Pluralism in a Bronze Age City in Anatolia, Turkey*. Chicago: University of  
1138 Chicago; 2015.
- 1139 29. Gregoricka LA. Geographic Origins and Dietary Transitions During the Bronze Age in  
1140 the Oman Peninsula. *American Journal of Physical Anthropology*. 2013;152:353-69.

- 1141 30. Woolley CL. Alalakh: An Account of the Excavations at Tell Atchana in the Hatay,  
1142 1937-1949. London: Oxford University Press; 1955.
- 1143 31. Yener KA, editor. The Amuq Valley Regional Projects: Excavations in the Plain of  
1144 Antioch: Tell Atchana, Ancient Alalakh, Vol. 1: The 2003-2004 Excavation Seasons.  
1145 Istanbul: Koç University; 2010.
- 1146 32. Yener KA, Akar M, Horowitz MT, editors. Tell Atchana, Alalakh. Volume 2: The  
1147 Late Bronze II City, the 2006-2010 Excavation Seasons. Istanbul: Koç University Press;  
1148 2019.
- 1149 33. Yener KA, Ingman T, editors. Alalakh and its Neighbors: Proceedings of the 15th  
1150 Anniversary Symposium at the New Hatay Archaeology Museum, June 10-12, 2015. Leiden:  
1151 Peeters; 2020.
- 1152 34. Bentley RA. Strontium Isotopes from the Earth to the Archaeological Skeleton: A  
1153 Review. Journal of Archaeological Method and Theory. 2006;13(3):135-87.
- 1154 35. Montgomery J. Passports from the Past: Investigating Human Dispersals using  
1155 Strontium Isotope Analysis of Tooth Enamel. Annals of Human Biology. 2010;37(3):325-46.
- 1156 36. Webb EC, White CD, Longstaffe FJ. Investigating Inherent Differences in Isotopic  
1157 Composition Between Human Bone and Enamel Bioapatite: Implications for Reconstructing  
1158 Residential Histories. Journal of Archaeological Science. 2014;50:97-107.
- 1159 37. Krause J, Pääbo S. Genetic Time Travel. Genetics. 2016;203(19-12).
- 1160 38. Leonardi M, Librado P, Der Sarkissian C, Schubert M, Alfarhan AH, Alquraishi SA,  
1161 et al. Evolutionary Patterns and Processes: Lessons from Ancient DNA. Systematic Biology.  
1162 2017;66(1):e1-e29.
- 1163 39. Pickrell JK, Reich D. Toward a New History and Geography of Human Genes  
1164 Informed by Ancient DNA. Trends in Genetics. 2014;30(9):377-89.
- 1165 40. Pederzani S, Britton K. Oxygen Isotopes in Bioarchaeology: Principles and  
1166 Applications, Challenges and Opportunities. Earth-Science Reviews. 2019;188:77-107.

- 1167 41. Roberts P, Fernandes R, Craig OE, Larsen T, Lucquin A, Swift J, et al. Calling All  
1168 Archaeologists: Guidelines for Terminology, Methodology, Data Handling, and Reporting  
1169 when Undertaking and Reviewing Stable Isotope Applications in Archaeology. *Rapid*  
1170 *Communications in Mass Spectrometry*. 2018;32:361-72.
- 1171 42. Hagelberg E, Hofreiter M, Keyser C. Ancient DNA: The First Three Decades.  
1172 *Philosophical Transactions of the Royal Society B: Biological Sciences*.  
1173 2015;370(1660):20130371.
- 1174 43. Krzewinska M, Kjellström A, Günther T, Hedenstierna-Jonson C, Zachrisson T,  
1175 Omrak A, et al. Genomic and Strontium Isotope Variation Reveal Immigration Patterns in a  
1176 Viking Age Town. *Current Biology*. 2018;28:2730-8.
- 1177 44. Massy K, Knipper C, Mittnik A, Kraus S, Pernicka E, Wittenborn F, et al. Patterns of  
1178 Transformation from the Final Neolithic to the Early Bronze Age: A Case Study from the  
1179 Lech Valley South of Augsburg. In: Stockhammer PW, Maran J, editors. *Appropriating*  
1180 *Innovations: Entangled Knowledge in Eurasia, 5000–1500 BCE*. Oxford: Oxbow Books;  
1181 2017. p. 241-61.
- 1182 45. Mittnik A, Massy K, Knipper C, Wittenborn F, Friedrich R, Pfrengle S, et al. Kinship-  
1183 Based Social Inequality in Bronze Age Europe. *Science*. 2019;366:731-4.
- 1184 46. Skourtanioti E, Erdal YS, Frangipane M, Balossi Restelli F, Yener KA, Pinnock F, et  
1185 al. Genomic History of Neolithic to Bronze Age Anatolia, Northern Levant and South  
1186 Caucasus. *Cell*. 2020;181:1158-75.
- 1187 47. Yener KA. New Excavations at Alalakh: The 14th - 12th Centuries BC. In: Yener KA,  
1188 editor. *Across the Border: Late Bronze-Iron Age Relations Between Syria and Anatolia*  
1189 *Proceedings of a Symposium Held at the Research Center of Anatolian Studies, Koc*  
1190 *University, Istanbul, May 31-June 1, 2010. Ancient Near Eastern Studies Supplement*.  
1191 Leuven: Peeters; 2013. p. 11-35.

- 1192 48. Woolley CL. A Forgotten Kingdom: a Record of the Results Obtained from the Recent  
1193 Important Excavation of Two Mounds, Atchana and al Mina, in the Turkish Hatay. Baltimore:  
1194 Penguin Books; 1953.
- 1195 49. Montesanto M, Pucci M. The Iron Age at Alalakh. Archaeology and History in  
1196 Lebanon. 2019;50-51(Autumn-Spring 2019-20):93-135.
- 1197 50. Yener KA, editor. The Amuq Valley Regional Projects. Chicago: Oriental Institute,  
1198 University of Chicago; 2005.
- 1199 51. Lauinger J. Archival Practices at Old Babylonian/Middle Bronze Age Alalakh (Level  
1200 VII). Chicago: University of Chicago; 2007.
- 1201 52. Lauinger J. The Temple of Ištar at Old Babylonian Alalakh. Journal of Ancient Near  
1202 Eastern Religions. 2008;8(2):181-217.
- 1203 53. Lauinger J. Following the Man of Yamhad: Settlement and Territory at Old  
1204 Babylonian Alalah. Leiden: Brill; 2015.
- 1205 54. von Dassow E. State and Society in the Late Bronze Age: Alalah Under the Mittani  
1206 Empire. Bethesda: CDL Press; 2008.
- 1207 55. Wiseman DJ. The Alalakh Tablets. London: British Institute of Archaeology at  
1208 Ankara; 1953.
- 1209 56. Wiseman DJ. Some Aspects of Babylonian Influence at Alalah. Syria.  
1210 1962;39(3/4):180-7.
- 1211 57. Yener KA. The Anatolian Middle Bronze Age Kingdoms and Alalakh: Mukish,  
1212 Kanesh and Trade. Anatolian Studies. 2007;57:151-60.
- 1213 58. Akar M. The Late Bronze Age Fortresses at Alalakh: Architecture and Identity in  
1214 Mediterranean Exchange Systems. In: Yener KA, editor. Across the Border: Late Bronze-Iron  
1215 Age Relations Between Syria and Anatolia Proceedings of a Symposium Held at the Research  
1216 Center of Anatolian Studies, Koç University, Istanbul, May 31-June 1, 2010. Ancient Near  
1217 Eastern Studies Supplement. Leuven: Peeters; 2013. p. 37-60.

- 1218 59. Akar M. Late Middle Bronze Age International Connections: An Egyptian Style Kohl  
1219 Pot from Alalakh. In: Kozal E, Akar M, Heffron Y, Çilingiroğlu Ç, Şerifoğlu TE, Çakırlar C,  
1220 et al., editors. Questions, Approaches and Dialogues in Eastern Mediterranean Archaeology  
1221 Studies in Honor of Marie-Henriette Gates and Charles Gates. Alter Orient und Altes  
1222 Testament. Münster: Ugarit-Verlag; 2017. p. 215-28.
- 1223 60. Akar M. Pointed Juglets as an International Trend in Late Bronze Ritual Practices: A  
1224 View from Alalakh. In: Maner Ç, Horowitz M, Gilbert A, editors. Overturning Certainties in  
1225 Near Eastern Archaeology: A Festschrift in Honor of K Aslihan Yener. Leiden: Brill; 2017. p.  
1226 1-24.
- 1227 61. Bergoffen C. The Cypriot Bronze Age Pottery from Sir Leonard Woolley's  
1228 Excavations at Alalakh (Tell Atchana). Vienna: Verlag der Österreichischen Akademie der  
1229 Wissenschaften; 2005.
- 1230 62. Collon D. The Seal Impressions from Tell Atchana/Alalakh. Bergerhof K, Dietrich M,  
1231 Loretz O, editors. Neukirchen-Vluyn: Neukirchener Verlag; 1975.
- 1232 63. Collon D. The Alalakh Cylinder Seals. A New Catalogue of the Actual Seals  
1233 Excavated by Sir Leonard Woolley at Tell Atchana, and from Neighbouring Sites on the  
1234 Syrian-Turkish Border. Oxford: British Archaeological Reports; 1982.
- 1235 64. Koehl RB. Mycenaean Pottery. In: Yener KA, editor. The Amuq Valley Regional  
1236 Projects: Excavations in the Plain of Antioch: Tell Atchana, Ancient Alalakh, Vol 1: the  
1237 2003-2004 Excavation Seasons. Istanbul: Koç University; 2010. p. 81-4.
- 1238 65. Koehl RB. The Near Eastern Contribution to Aegean Wall Painting and Vice Versa.  
1239 In: Aruz J, Graf SB, Rakic Y, editors. Cultures in Contact From Mesopotamia to the  
1240 Mediterranean in the Second Millennium BC. New York: Metropolitan Museum of Art; 2013.  
1241 p. 170-9.
- 1242 66. Koehl RB. Alalakh and the Aegean: Five Centuries of Shifting but Enduring Contacts.  
1243 In: Yener KA, Ingman T, editors. Alalakh and its Neighbors: Proceedings of the 15th

- 1244 Anniversary Symposium at the New Hatay Archaeology Museum, June 10-12, 2015. Leiden:
- 1245 Peeters; 2020. p. 201-24.
- 1246 67. Kozal E. Cypriot Pottery. In: Yener KA, editor. The Amuq Valley Regional Projects:
- 1247 Excavations in the Plain of Antioch: Tell Atchana, Ancient Alalakh, Vol 1: the 2003-2004
- 1248 Excavation Seasons. Istanbul: Koç University; 2010. p. 67-80.
- 1249 68. Kozal E, Haciosmanoğlu S, Kibaroglu M, Sunal G. A General Outlook on the
- 1250 Connections Between Alalakh and Cyprus in the Middle and Late Bronze Ages: Textual,
- 1251 Archaeological and Archaeometric Studies. In: Yener KA, Ingman T, editors. Alalakh and its
- 1252 Neighbors: Proceedings of the 15th Anniversary Symposium at the New Hatay Archaeology
- 1253 Museum, June 10-12, 2015. Leiden: Peeters; 2020. p. 419-32.
- 1254 69. Niemeier WD, Niemeier B. Aegean Frescoes in Syria-Palestine: Alalakh and Tel
- 1255 Kabri. In: Sherratt S, editor. The Wall Paintings of Thera: Proceedings of the First
- 1256 International Symposium. Athens: Thera Foundation; 2000. p. 763-800.
- 1257 70. Ritner RK. Egyptian New Kingdom Evidence for the Chronology of Alalakh. In:
- 1258 Yener KA, Akar M, Horowitz MT, editors. Tell Atchana, Alalakh Volume 2: The Late
- 1259 Bronze II City, the 2006-2010 Excavation Seasons. Istanbul: Koç University Press; 2019. p.
- 1260 295-309.
- 1261 71. Yener KA. Acrobats, Bulls, and Leaping Scenes on New Alalakh Amphoroid Kraters.
- 1262 Near Eastern Archaeology. 2009;72(1):48-50.
- 1263 72. Yener KA. Hittite Metals at the Frontier: A Three-Spiked Battle Ax from Alalakh. In:
- 1264 Betancourt PP, Ferrence SC, editors. Metallurgy: Understanding How, Learning Why: Studies
- 1265 in Honor of James D Muhly. Philadelphia: INSTAP Academic Press; 2011. p. 265-72.
- 1266 73. Yener KA, Dinçol B, Peker H. Prince Tuthaliya and Princess Ašnuhepa. *Nouvelles*
- 1267 *Assyriologiques Brèves et Utilitaires* (NABU). 2014;88(4):136-8.
- 1268 74. Yener KA. Material Evidence of Cult and Ritual at Tell Atchana, Ancient Alalakh:
- 1269 Deities of the Transitional Middle-Late Bronze Period. In: Ciafardoni P, Giannessi D, editors.

- 1270 From the Treasures of Syria: Essays on Art and Archaeology in Honour of Stefania Mazzoni.
- 1271 Leiden: Netherlands Institute for the Near East; 2015. p. 203-15.
- 1272 75. Yener KA. Cult and Ritual at Late Bronze Age II Alalakh: Hybridity and Power under
- 1273 Hittite Administration. In: Mouton A, editor. 5èmes Rencontres d'Archéologie de L'IFÉA
- 1274 Hittitology Today: Studies on Hittite and Neo-Hittite Anatolia in Honor of Emmanuel
- 1275 Laroche's 100th Birthday. Istanbul: Institut Français d'Études Anatoliennes Georges -
- 1276 Dumézil; 2017. p. 215-24.
- 1277 76. Ingman T. The Extramural Cemetery at Tell Atchana, Ancient Alalakh and GIS
- 1278 Modeling. In: Maner Ç, Horowitz M, Gilbert A, editors. Overturning Certainties in Near
- 1279 Eastern Archaeology: A Festschrift in Honor of K Aslihan Yener. Leiden: Brill; 2017. p. 245-
- 1280 58.
- 1281 77. Ingman T. Identity and Changing Funerary Rituals at Tell Atchana, Alalakh: Mortuary
- 1282 and Isotopic Analyses. Istanbul: Koç University; 2020.
- 1283 78. Shafiq R. Evidence of a Possible Elite Cemetery at Alalakh / Tell Atchana.
- 1284 Arkeometri Sonuçları Toplantısı. 33. Ankara: T.C. Kültür ve Turizm Bakanlığı, Kültür
- 1285 Varlıkları ve Müzeler Genel Müdürlüğü; 2018. p. 193-203.
- 1286 79. Ingman T. Mortuary Practices and GIS Modeling at Tell Atchana, Ancient Alalakh.
- 1287 In: Yener KA, Ingman T, editors. Alalakh and its Neighbors: Proceedings of the 15th
- 1288 Anniversary Symposium at the New Hatay Archaeology Museum, June 10-12, 2015. Leiden:
- 1289 Peeters; 2020. p. 389-406.
- 1290 80. Boutin AT. Embodying Life and Death: Osteobiographical Narratives from Alalakh.
- 1291 Philadelphia: University of Pennsylvania; 2008.
- 1292 81. Boutin AT. The Burials. In: Yener KA, editor. The Amuq Valley Regional Projects:
- 1293 Excavations in the Plain of Antioch: Tell Atchana, Ancient Alalakh, Vol 1: The 2003-2004
- 1294 Excavation Seasons. Istanbul: Koç University Press; 2010. p. 111-21.



- 1295 82. Yener KA. A Plaster Encased Multiple Burial at Alalakh: Cist Tomb 3017. In: Koehl  
1296 RB, editor. Amilla: The Quest for Excellence Studies in Honor of Günter Kopcke on the  
1297 Occasion of his 75 Birthday. Philadelphia: INSTAP Academic Press; 2013. p. 263-79.
- 1298 83. Shafiq R. Come and Hear My Story: The 'Well-Lady' of Alalakh. In: Yener KA,  
1299 Ingman T, editors. Alalakh and its Neighbors: Proceedings of the 15th Anniversary  
1300 Symposium at the New Hatay Archaeology Museum, June 10-12, 2015. Leiden: Peeters;  
1301 2020. p. 433-52.
- 1302 84. Ingman T. Mortuary Practices at Tell Atchana, Ancient Alalakh in the Middle and  
1303 Late Bronze Ages. Istanbul: Koç University; 2014.
- 1304 85. Gamba C, Jones ER, Teasdale MD, McLaughlin RL, Gonzalez-Fortes G, Mattiangeli  
1305 V, et al. Genome Flux and Stasis in a Five Millennium Transect of European Prehistory.  
1306 Nature Communications. 2014;5:5257.
- 1307 86. Parker C, Rohrlach AB, Friederich S, Nagel S, Meyer M, Krause J, et al. A Systematic  
1308 Investigation of Human DNA Preservation in Medieval Skeletons BioRxiv. 2020;preprint.
- 1309 87. Pinhasi R, Fernandes D, Sirak K, Novak M, Connell S, Alparslan Roodenberg S, et al.  
1310 Optimal Ancient DNA Yields from the Inner Ear Part of the Human Petrous Bone. PLoS  
1311 ONE. 2015;10(6):e0129102.
- 1312 88. Hillson S. Dental Anthropology. Cambridge: Cambridge University Press; 1996.
- 1313 89. Slovak NM, Paytan A. Applications of Sr Isotopes in Archaeology. In: Baskaran M,  
1314 editor. Handbook of Environmental Isotope Geochemistry. 1. Berlin: Springer-Verlag; 2011.  
1315 p. 743-68.
- 1316 90. Dupras TL, and Tocheri, Matthew W. Reconstructing Infant Weaning Histories at  
1317 Roman Period Kellis, Egypt Using Stable Isotope Analysis of Dentition. American Journal of  
1318 Physical Anthropology. 2007;134:63-74.

- 1319 91. Pearson JA, Hedges REM, Molleson TI, Ozbek M. Exploring the Relationship  
1320 Between Weaning and Infant Mortality: An Isotope Case Study from Aşıklı Höyük and  
1321 Çayönü Tepesi. *American Journal of Physical Anthropology*. 2010;143:448-57.
- 1322 92. Wright LE. Examining Childhood Diets at Kaminaljuyu, Guatemala, Through Stable  
1323 Isotopic Analysis of Sequential Enamel Microsamples. *Archaeometry*. 2013;55(1):113-33.
- 1324 93. Dansgaard W. Stable Isotopes in Precipitation. *Tellus*. 1964;16(4):436-68.
- 1325 94. DeNiro MJ, Epstein S. Relationship Between the Oxygen Isotope Ratios of Terrestrial  
1326 Plant Cellulose, Carbon Dioxide, and Water. *Science*. 1979;204(4388):51-3.
- 1327 95. Emerson SR, Hedges JI. *Chemical Oceanography and the Marine Carbon Cycle*.  
1328 Cambridge: Cambridge University Press; 2008.
- 1329 96. Gat JR. Oxygen and Hydrogen Isotopes in the Hydrologic Cycle. *Annual Review of*  
1330 *Earth and Planetary Sciences*. 1996;24:225-62.
- 1331 97. Kohn MJ, Schoeninger MJ, Valley JW. Herbivore Tooth Oxygen Isotope  
1332 Compositions: Effects of Diet and Physiology. *Geochimica et Cosmochimica Acta*.  
1333 1996;60(20):3889-96.
- 1334 98. Knipper C. Die Strontiumisotopenanalyse: Eine naturwissenschaftliche Methode zur  
1335 Erfassung von Mobilität in der Ur- und Frühgeschichte'. *Jahrbuch des Römisch-*  
1336 *Germanischen Zentralmuseums Mainz*. 2015;51:589-685.
- 1337 99. Longinelli A. Oxygen Isotopes in Mammal Bone Phosphate: A New Tool for  
1338 Paleohydrological and Paleoclimatological Research? *Geochimica et Cosmochimica Acta*.  
1339 1984;48:385-90.
- 1340 100. Luz B, Kolodny Y, Horowitz M. Fractionation of Oxygen Isotopes Between  
1341 Mammalian Bone-Phosphate and Environmental Drinking Water. *Geochimica et*  
1342 *Cosmochimica Acta*. 1984;48:1689-93.
- 1343 101. Luz B, Kolodny Y. Oxygen Isotope Variations in Phosphate of Biogenic Apatites, IV.  
1344 Mammal Teeth and Bones. *Earth and Planetary Science Letters*. 1985;75:29-36.

- 1345 102. Luz B, Cormie AB, Schwarcz HP. Oxygen Isotope Variations in Phosphate of Deer  
1346 Bones. *Geochimica et Cosmochimica Acta*. 1990;54:1723-8.
- 1347 103. Tütken T. Die Isotopenanalyse fossiler Skelettreste - Bestimmung der Herkunft und  
1348 Mobilität von Menschen und Tieren. In: Meller H, Alt KW, editors. *Anthropologie, Isotopie*  
1349 *und DNA - biografische Annäherung an namenlose vorgeschichtliche Skelette? 2*  
1350 *Mitteldeutscher Archäologentag vom 08 bis 10 Oktober 2009 in Halle (Saale)*. Anhalt:  
1351 Landesmuseum für Vorgeschichte; 2010. p. 33-51.
- 1352 104. Bowen GJ, Revenaugh J. Interpolating the Isotopic Composition of Modern Meteoric  
1353 Precipitation. *Water Resources Research*. 2003;39(10):1299.
- 1354 105. Bowen GJ, Wassenaar LI, Hobson KA. Global Application of Stable Hydrogen and  
1355 Oxygen Isotopes to Wildlife Forensics. *Oecologia*. 2005;143:337-48.
- 1356 106. Bowen GJ. The Online Isotopes in Precipitation Calculator, version 3.1 2019  
1357 [Available from: <http://www.waterisotopes.org>.
- 1358 107. Organization) IAEA WWM. Global Network of Isotopes in Precipitation. The GNIP  
1359 Database. 2015 [Available from: <https://nucleus.iaea.org/wiser>.
- 1360 108. Al-Charideh A. Recharge and Mineralization of Groundwater of the Upper Cretaceous  
1361 Aquifer in Orontes Basin, Syria. *Hydrological Sciences Journal*. 2013;58(2):452-67.
- 1362 109. Koeniger P, Toll M, Himmelsbach T. Stable Isotopes of Precipitation and Spring  
1363 Waters Reveal an Altitude Effect in the Anti-Lebanon Mountains, Syria. *Hydrological*  
1364 *Processes*. 2016;30:2851-60.
- 1365 110. Koeniger P, Margane A, Abi-Rizk J, Himmelsbach T. Stable Isotope-Based Mean  
1366 Catchment Altitudes of Springs in the Lebanon Mountains. *Hydrological Processes*.  
1367 2017;31:3701-18.
- 1368 111. Lightfoot E, O'Connell TC. On the Use of Biomineral Oxygen Isotope Data to Identify  
1369 Human Migrants in the Archaeological Record: Intra-Sample Variation, Statistical Methods  
1370 and Geographical Considerations. *PLoS ONE*. 2016;11(4):e0153850.

- 1371 112. El Ouahabi M, Hubert-Ferrari A, Fagel N. Lacustrine Clay Mineral Assemblages as a  
1372 Proxy for Land-Use and Climate Changes over the Last 4 kyr: The Amik Lake Case Study,  
1373 Southern Turkey. *Quaternary International*. 2017;438(Part B):15-29.
- 1374 113. Gutsuz P, Kibaroglu M, Sunal G, Hacısmanoğlu S. Geochemical Characterization of  
1375 Clay Deposits in the Amuq Valley (Southern Turkey) and the Implications for Archaeometric  
1376 Study of Ancient Ceramics. *Applied Clay Science*. 2017;141:316-33.
- 1377 114. Capo RC, Stewart BW, Chadwick OA. Strontium Isotopes as Tracers of Ecosystem  
1378 Processes: Theory and Methods. *Geoderma*. 1998;82:197-225.
- 1379 115. Wilkinson TJ, Friedman ES, Alp E, Stampfl APJ. The Geoarchaeology of a Lake  
1380 Basin: Spatial and Chronological Patterning of Sedimentation in the Amuq Plain, Turkey.  
1381 *Recherches Archeometriques*. 2001;1:211-26.
- 1382 116. Faure G, Powell JL. Strontium Isotope Geology. von Engelhardt W, Hahn T, Roy R,  
1383 Wyllie PJ, editors. Berlin: Springer-Verlag; 1972.
- 1384 117. Hartman G, Richards M. Mapping and Defining Sources of Variability in Bioavailable  
1385 Strontium Isotope Ratios in the Eastern Mediterranean. *Geochimica et Cosmochimica Acta*.  
1386 2014;126:250-64.
- 1387 118. Seyrek A, Demir T, Pringle M, Yurtmen S, Westaway R, Bridgland D, et al. Late  
1388 Cenozoic Uplift of the Amanos Mountains and Incision of the Middle Ceyhan River Gorge,  
1389 Southern Turkey; Ar–Ar Dating of the Düziçi Basalt. *Geomorphology*. 2008;97:321-55.
- 1390 119. Wilkinson TJ. Geoarchaeology of the Amuq Plain. *American Journal of Archaeology*.  
1391 2000;104(2):168-79.
- 1392 120. Exploration) MTvAGMGDoMRa. Jeoloji Haritaları 2018 [Available from:  
1393 <http://www.mta.gov.tr/v3.0/sayfalar/hizmetler/doc/HATAY.pdf>.
- 1394 121. Wilkinson TJ. The History of the Lake of Antioch: A Preliminary Note. In: Young  
1395 GD, Chavalas MW, Averbeck RE, editors. *Crossing Boundaries and Linking Horizons*  
1396 *Studies in Honor of Michael C Astour on His 80th Birthday*. Bethesda: CDL; 1997. p. 63-87.

- 1397 122. Yilmaz Y. New Evidence and Model on the Evolution of the Southeast Anatolian  
1398 Orogen. Geological Society of America Bulletin. 1993;105:251-71.
- 1399 123. Dilek Y, Thy P. Island Arc Tholeiite to Boninitic Melt Evolution of the Cretaceous  
1400 Kizildag (Turkey) Ophiolite: Model for Multi-Stage Early Arc–Forearc Magmatism in  
1401 Tethyan Subduction Factories. Lithos. 2009;113:68-87.
- 1402 124. Karaoğlu F, Parlak O, Klötzli U, Thöni M, Koller F. U–Pb and Sm–Nd  
1403 Geochronology of the Kızıldağ (Hatay, Turkey) Ophiolite: Implications for the Timing and  
1404 Duration of Suprasubduction Zone Type Oceanic Crust Formation in the Southern Neotethys.  
1405 Geological Magazine. 2013;150(2):283-99.
- 1406 125. Bingöl AF, Beyarslan M, Lin Y-C, Lee H-Y. Geochronological and Geochemical  
1407 Constraints on the Origin of the Southeast Anatolian Ophiolites, Turkey. Arabian Journal of  
1408 Geosciences. 2018;11:569.
- 1409 126. Boulton SJ, Robertson AHF, Ellam RM, Şafak Ü, Ünlügenç UC. Strontium Isotopic  
1410 and Micropalaeontological Dating Used to Help Redefine the Stratigraphy of the Neotectonic  
1411 Hatay Graben, Southern Turkey. Turkish Journal of Earth Sciences. 2007;16:141-79.
- 1412 127. Duman TY, Robertson AHF, Elmacı H, Kara M. Palaeozoic-Recent Geological  
1413 Development and Uplift of the Amanos Mountains (S Turkey) in the Critically Located  
1414 Northwesternmost Corner of the Arabian Continent. Geodinamica Acta. 2017;29(1):103-38.
- 1415 128. Meiggs DC. Herding Practices, Urban Provisioning, and Human Mobility at Tell  
1416 Atchana (Alalakh): 2009 Strontium Isotope ( $^{87}\text{Sr}/^{86}\text{Sr}$ ) Results. Arkeometri Sonuçları  
1417 Toplantısı. Ankara: T.C. Kültür ve Turizm Bakanlığı, Kültür Varlıkları ve Müzeler Genel  
1418 Müdürlüğü; 2010. p. 51-68.
- 1419 129. Burton JH, Hahn R. Assessing the “Local”  $^{87}\text{Sr}/^{86}\text{Sr}$  Ratio for Humans. In: Grupe G,  
1420 McGlynn GC, editors. Isotopic Landscapes in Bioarchaeology. Berlin: Springer-Verlag; 2016.  
1421 p. 113-21.

- 1422 130. Burton JH, Price TD. Seeking the Local  $^{87}\text{Sr}/^{86}\text{Sr}$  Ratio To Determine Geographic  
1423 Origins of Humans. In: Armitage RA, Burton JH, editors. Archaeological Chemistry VIII.  
1424 ACS Symposium Series. Washington D.C.: American Chemical Society; 2013. p. 309-20.
- 1425 131. Riehl S. Flourishing Agriculture in Times of Political Instability: The  
1426 Archaeobotanical and Isotopic Evidence from Tell Atchana. In: Yener KA, editor. The Amuq  
1427 Valley Regional Projects: Excavations in the Plain of Antioch: Tell Atchana, Ancient  
1428 Alalakh, Vol 1: The 2003-2004 Excavation Seasons. Istanbul: Koç University Press; 2010. p.  
1429 123-36.
- 1430 132. Çizer Ö. Archaeobotanical Macro Remains from Late Bronze Age Kinet Höyük and  
1431 Tell Atchana (Alalakh) in Southern Turkey: Economical and Environmental Considerations.  
1432 Tübingen: Eberhard Karls University Tübingen; 2006.
- 1433 133. Yener KA, Edens C, Harrison TP, Verstraete J, Wilkinson TJ. The Amuq Valley  
1434 Regional Project, 1995-1998. American Journal of Archaeology. 2000;104(2):163-220.
- 1435 134. Çakırlar C, Rossel S. Faunal Remains from the 2003-2004 Excavations at Tell  
1436 Atchana. In: Yener KA, editor. The Amuq Valley Regional Projects: Excavations in the Plain  
1437 of Antioch: Tell Atchana, Ancient Alalakh, Vol 1: The 2003-2004 Excavation Seasons.  
1438 Istanbul: Koç University Press; 2010. p. 141-6.
- 1439 135. Horowitz MT, Çakırlar C. Novel Uses of Wild Faunal Resources at Transitional  
1440 Middle-Late Bronze Age Tell Atchana. In: Maner Ç, Horowitz M, Gilbert A, editors.  
1441 Overturning Certainties in Near Eastern Archaeology: A Festschrift in Honor of K Aslıhan  
1442 Yener. Leiden: Brill; 2017. p. 222-44.
- 1443 136. Jobling MA, Hollox E, Hurles M, Kivisild T, Tyler-Smith C. Human Evolutionary  
1444 Genetics. New York: Garland Science; 2014.
- 1445 137. Jobling MA, Rasteiro R, Wetton JH. In the Blood: The Myth and Reality of Genetic  
1446 Markers of Identity. Ethnic and Racial Studies. 2016;39(2):142-61.
- 1447 138. Mathieson I, Scally A. What is Ancestry? PloS Genetics. 2020;16(3):e1008624.

1448 139. Agranat-Tamir L, Waldman S, Martin MAS, Gokhman D, Mishol N, Eshel T, et al.  
1449 The Genomic History of the Bronze Age Southern Levant. *Cell*. 2020;181(5):1146-57.

1450 140. Feldman M, Master DM, Bianco RA, Burri M, Stockhammer PW, Mitnik A, et al.  
1451 Ancient DNA Sheds Light on the Genetic Origins of Early Iron Age Philistines. *Science*  
1452 *Advances*. 2019;5(7):eaax0061.

1453 141. Haber M, Doumet-Serhal C, Scheib C, Xue Y, Danecek P, Mezzavilla M, et al.  
1454 Continuity and Admixture in the Last Five Millennia of Levantine History from Ancient  
1455 Canaanite and Present-Day Lebanese Genome Sequences. *The American Journal of Human*  
1456 *Genetics*. 2017;101(2):274-82.

1457 142. Roberts P, Prendergast ME, Janzen A, Shipton C, Blinkhorn J, Zech J, et al. Late  
1458 Pleistocene to Holocene Human Palaeoecology in the Tropical Environments of Coastal  
1459 Eastern Africa. *Palaeogeography, Palaeoclimatology, Palaeoecology*. 2020;537:109438.

1460 143. Lee-Thorp J, Likius A, Mackaye HT, Vignaud P, Sponheimer M, Brunet M. Isotopic  
1461 Evidence for an Early Shift to C<sub>4</sub> Resources by Pliocene Hominins in Chad. *PNAS*.  
1462 2012;109(50):20369–72.

1463 144. Roberts P, Perera N, Wedage O, Deraniyagala S, Perera J, Eregama S, et al. Fruits of  
1464 the Forest: Human Stable Isotope Ecology and Rainforest Adaptations in Late Pleistocene and  
1465 Holocene (~36 to 3 ka) Sri Lanka. *Journal of Human Evolution*. 2017;106:102-18.

1466 145. Sponheimer M, Lee-Thorp J, de Ruiter D, Codron D, Codron J, Baugh AT, et al.  
1467 Hominins, Sedges, and Termites: New Carbon Isotope Data from the Sterkfontein Valley and  
1468 Kruger National Park. *Journal of Human Evolution*. 2005;48:301-12.

1469 146. Copeland SR, Cawthra HC, Fisher EC, Lee-Thorp JA, Cowling RM, le Roux PJ, et al.  
1470 Strontium Isotope Investigation of Ungulate Movement Patterns on the Pleistocene Paleo-  
1471 Agulhas Plain of the Greater Cape Floristic Region, South Africa. *Quaternary Science*  
1472 *Reviews*. 2016;141:65-84.



1473 147. Pin C, Briot D, Bassin C, Poitrasson F. Concomitant Separation of Strontium and  
1474 Samarium-Neodymium for Isotopic Analysis in Silicate Samples, based on Specific  
1475 Extraction Chromatography. *Analytica Chimica Acta*. 1994;298:209-17.

1476 148. Rohland N, Harney E, Mallick S, Nordenfelt S, Reich D. Partial uracil-DNA-  
1477 glycosylase treatment for screening of ancient DNA. *Philos Trans R Soc Lond B Biol Sci*.  
1478 2015;370(1660):20130624-.

1479 149. Rohland N, Glocke I, Aximu-Petri A, Meyer M. Extraction of Highly Degraded DNA  
1480 from Ancient Bones, Teeth and Sediments for High-Throughput Sequencing. *Nature*  
1481 *Protocols*. 2018;13:2447-61.

1482 150. Gansauge M-T, Aximu-Petri A, Nagel S, Meyer M. Manual and Automated  
1483 Preparation of Single-Stranded DNA Libraries for the Sequencing of DNA from Ancient  
1484 Biological Remains and other Sources of Highly Degraded DNA. *Nature Protocols*.  
1485 2020;15:2279-300.

1486 151. Peltzer A, Jäger G, Herbig A, Seitz A, Kniep C, Krause J, et al. EAGER: efficient  
1487 ancient genome reconstruction. *Genome Biology*. 2016;17(1):60.

1488 152. Schubert M, Lindgreen S, Orlando L. AdapterRemoval v2: rapid adapter trimming,  
1489 identification, and read merging. *BMC Res Notes*. 2016;9:88-.

1490 153. Li H, Durbin R. Fast and accurate short read alignment with Burrows-Wheeler  
1491 transform. *Bioinformatics (Oxford, England)*. 2009;25(14):1754-60.

1492 154. Jónsson H, Ginolhac A, Schubert M, Johnson PLF, Orlando L. mapDamage2.0: Fast  
1493 Approximate Bayesian Estimates of Ancient DNA Damage Parameters. *Bioinformatics*.  
1494 2013;29(13):1682-4.

1495 155. Mathieson I, Lazaridis I, Rohland N, Mallick S, Patterson N, Roodenberg SA, et al.  
1496 Genome-wide Patterns of Selection in 230 Ancient Eurasians. *Nature*. 2015;528:499-503.

1497 156. Li H, Handsaker B, Wysoker A, Fennell T, Ruan J, Homer N, et al. The Sequence  
1498 Alignment/Map format and SAMtools. *Bioinformatics*. 2009;25(26):2078-9.



1499 157. Renaud G, Slon V, Duggan AT, Kelso J. Schmutzi: estimation of contamination and  
1500 endogenous mitochondrial consensus calling for ancient DNA. *Genome Biology*.  
1501 2015;16(1):224.

1502 158. Korneliussen TS, Albrechtsen A, Nielsen R. ANGSD: Analysis of Next Generation  
1503 Sequencing Data. *BMC Bioinformatics*. 2014;15(1):356.

1504 159. Lazaridis I, Nadel D, Rollefson G, Merret DC, Rohland N, Mallick S, et al. Genomic  
1505 Insights into the Origin of Farming in the Ancient Near East. *Nature*. 2016;536(7617):419-24.

1506 160. Patterson N, Moorjani P, Luo Y, Mallick S, Rohland N, Zhan Y, et al. Ancient  
1507 Admixture in Human History. *Genetics*. 2012;192:1065-93.

1508 161. de Barros Damgaard P, Martiniano R, Kamm J, Moreno-Mayar JV, Kroonen G,  
1509 Peyrot M, et al. The First Horse Herders and the Impact of Early Bronze Age Steppe  
1510 Expansions into Asia. *Science*. 2018;360(6396):1422.

1511 162. Feldman M, Fernández-Domínguez E, Reynolds L, Baird D, Pearson J, HersHKovitz I,  
1512 et al. Late Pleistocene Human Genome Suggests a Local Origin for the First Farmers of  
1513 Central Anatolia. *Nature Communications*. 2019;10(1):1218.

1514 163. Fu Q, Posth C, Hajdinjak M, Petr M, Mallick S, Fernandes D, et al. The genetic  
1515 history of Ice Age Europe. *Nature*. 2016;534(7606):200-5.

1516 164. González-Fortes G, Jones ER, Lightfoot E, Bonsall C, Lazar C, Grandal-d'Anglade A,  
1517 et al. Paleogenomic Evidence for Multi-generational Mixing between Neolithic Farmers and  
1518 Mesolithic Hunter-Gatherers in the Lower Danube Basin. *Current Biology*.  
1519 2017;27(12):1801-10.e10.

1520 165. Günther T, Valdiosera C, Malmström H, Ureña I, Rodríguez-Varela R, Sverrisdóttir  
1521 ÓO, et al. Ancient genomes link early farmers from Atapuerca in Spain to modern-day  
1522 Basques. *Proceedings of the National Academy of Sciences*. 2015;112(38):11917.

- 1523 166. Harney É, May H, Shalem D, Rohland N, Mallick S, Lazaridis I, et al. Ancient DNA  
1524 from Chalcolithic Israel reveals the role of population mixture in cultural transformation.  
1525 Nature Communications. 2018;9(1):3336.
- 1526 167. Hofmanova Z, Kreutzer S, Hellenthal G, Sell C, Diekmann Y, Diez-Del-Molino D, et  
1527 al. Early farmers from across Europe directly descended from Neolithic Aegeans. Proc Natl  
1528 Acad Sci U S A. 2016;113(25):6886-91.
- 1529 168. Jeong C, Balanovsky O, Lukianova E, Kahbatkyzy N, Flegontov P, Zaporozhchenko  
1530 V, et al. The genetic history of admixture across inner Eurasia. Nature Ecology & Evolution.  
1531 2019;3(6):966-76.
- 1532 169. Jones ER, Gonzalez-Fortes G, Connell S, Siska V, Eriksson A, Martiniano R, et al.  
1533 Upper Palaeolithic genomes reveal deep roots of modern Eurasians. Nat Commun.  
1534 2015;6:8912.
- 1535 170. Lazaridis I, Patterson N, Mittnik A, Renaud G, Mallick S, Kirsanow K, et al. Ancient  
1536 human genomes suggest three ancestral populations for present-day Europeans. Nature.  
1537 2014;513(7518):409-13.
- 1538 171. Lazaridis I, Mittnik A, Patterson N, Mallick S, Rohland N, Pfrengle S, et al. Genetic  
1539 origins of the Minoans and Mycenaeans. Nature. 2017;548(7666):214-8.
- 1540 172. Lipson M, Szécsényi-Nagy A, Mallick S, Pósa A, Stégmár B, Keerl V, et al. Parallel  
1541 palaeogenomic transects reveal complex genetic history of early European farmers. Nature.  
1542 2017;551(7680):368-72.
- 1543 173. Martiniano R, Cassidy, L.M., Ó'Maoldúin, R., McLaughlin, R., Silva, N.M., Manco,  
1544 L., et al. . The population genomics of archaeological transition in west Iberia: Investigation  
1545 of ancient substructure using imputation and haplotype-based methods. PLoS Genet  
1546 2017;13(7):e1006852.

- 1547 174. Mathieson I, Alpaslan-Roodenberg S, Posth C, Szécsényi-Nagy A, Rohland N,  
1548 Mallick S, et al. The Genomic History of Southeastern Europe. *Nature*. 2018;555(7695):197-  
1549 203.
- 1550 175. McColl H, Racimo F, Vinner L, Demeter F, Gakuhari T, Moreno-Mayar JV, et al. The  
1551 prehistoric peopling of Southeast Asia. *Science*. 2018;361(6397):88.
- 1552 176. Meyer M, Kircher M, Gansauge M-T, Li H, Racimo F, Mallick S, et al. A high-  
1553 coverage genome sequence from an archaic Denisovan individual. *Science (New York, NY)*.  
1554 2012;338(6104):222-6.
- 1555 177. Mitnik A, Wang C-C, Pfrengle S, Daubaras M, Zariņa G, Hallgren F, et al. The  
1556 genetic prehistory of the Baltic Sea region. *Nature Communications*. 2018;9(1):442.
- 1557 178. Mondal M, Casals F, Xu T, Dall'Olio GM, Pybus M, Netea MG, et al. Genomic  
1558 analysis of Andamanese provides insights into ancient human migration into Asia and  
1559 adaptation. *Nature Genetics*. 2016;48(9):1066-70.
- 1560 179. Narasimhan VM, Patterson N, Moorjani P, Rohland N, Bernardos R, Mallick S, et al.  
1561 The formation of human populations in South and Central Asia. *Science*.  
1562 2019;365(6457):eaat7487.
- 1563 180. Olalde I, Schroeder H, Sandoval-Velasco M, Vinner L, Lobón I, Ramirez O, et al. A  
1564 Common Genetic Origin for Early Farmers from Mediterranean Cardial and Central European  
1565 LBK Cultures. *Molecular Biology and Evolution*. 2015;32(12):3132-42.
- 1566 181. Olalde I, Brace S, Allentoft ME, Armit I, Kristiansen K, Booth T, et al. The Beaker  
1567 phenomenon and the genomic transformation of northwest Europe. *Nature*.  
1568 2018;555(7695):190-6.
- 1569 182. Olalde I, Mallick S, Patterson N, Rohland N, Villalba-Mouco V, Silva M, et al. The  
1570 genomic history of the Iberian Peninsula over the past 8000 years. *Science*.  
1571 2019;363(6432):1230.

- 1572 183. Pickrell JK, Patterson N, Barbieri C, Berthold F, Gerlach L, Güldemann T, et al. The  
1573 genetic prehistory of southern Africa. *Nature Communications*. 2012;3(1):1143.
- 1574 184. Prüfer K, de Filippo C, Grote S, Mafessoni F, Korlević P, Hajdinjak M, et al. A high-  
1575 coverage Neandertal genome from Vindija Cave in Croatia. *Science*. 2017;358(6363):655.
- 1576 185. Raghavan M, Skoglund P, Graf KE, Metspalu M, Albrechtsen A, Moltke I, et al.  
1577 Upper Palaeolithic Siberian genome reveals dual ancestry of Native Americans. *Nature*.  
1578 2014;505(7481):87-91.
- 1579 186. Rasmussen M, Anzick SL, Waters MR, Skoglund P, DeGiorgio M, Stafford TW, Jr.,  
1580 et al. The genome of a Late Pleistocene human from a Clovis burial site in western Montana.  
1581 *Nature*. 2014;506(7487):225-9.
- 1582 187. Seguin-Orlando A, Korneliussen TS, Sikora M, Malaspinas A-S, Manica A, Moltke I,  
1583 et al. Genomic structure in Europeans dating back at least 36,200 years. *Science*.  
1584 2014;346(6213):1113.
- 1585 188. Skoglund P, Posth C, Sirak K, Spriggs M, Valentin F, Bedford S, et al. Genomic  
1586 insights into the peopling of the Southwest Pacific. *Nature*. 2016;538(7626):510-3.
- 1587 189. Skoglund P, Thompson JC, Prendergast ME, Mittnik A, Sirak K, Hajdinjak M, et al.  
1588 Reconstructing Prehistoric African Population Structure. *Cell*. 2017;171(1):59-71.e21.
- 1589 190. Vyas DN, Al-Meerri A, Mulligan CJ. Testing support for the northern and southern  
1590 dispersal routes out of Africa: an analysis of Levantine and southern Arabian populations.  
1591 *American Journal of Physical Anthropology*. 2017;164(4):736-49.
- 1592 191. Patterson N, Price AL, Reich D. Population Structure and Eigenanalysis. *PloS*  
1593 *Genetics*. 2006;2(12):e190.
- 1594 192. Price AL, Patterson NJ, Plenge RM, Weinblatt ME, Shadick NA, Reich D. Principal  
1595 components analysis corrects for stratification in genome-wide association studies. *Nature*  
1596 *Genetics*. 2006;38(8):904-9.

- 1597 193. Monroy Kuhn JM, Jakobsson M, Gunther T. Estimating genetic kin relationships in  
1598 prehistoric populations. PLoS One. 2018;13(4):e0195491.
- 1599 194. Lipatov M, Sanjeev K, Patro R, Veeramah KR. Maximum Likelihood Estimation of  
1600 Biological Relatedness from Low Coverage Sequencing Data. bioRxiv. 2015:023374.
- 1601 195. Price TD, Burton JH, Bentley RA. The Characterization of Biologically Available  
1602 Strontium Isotope Ratios for the Study of Prehistoric Migration. Archaeometry.  
1603 2002;44(1):117-35.
- 1604 196. Bentley RA, Krause R, Price TD, Kaufmann B. Human Mobility at the Early Neolithic  
1605 Settlement of Vaihingen, Germany: Evidence from Strontium Isotope Analysis. Archaeometry.  
1606 2003;45(3):471-86.
- 1607 197. Stephan E, Knipper C, Schatz K, Price TD, Hegner E. Strontium Isotopes in Faunal  
1608 Remains: Evidence of the Strategies for Land Use at the Iron Age Site Eberdingen-Hochdorf  
1609 (Baden-Württemberg, Germany). In: Kaiser E, Burger J, Schier W, editors. Population  
1610 Dynamics in Prehistory and Early History: New Approaches using Stable Isotopes and  
1611 Genetics. TOPOI Berlin Studies of the Ancient World. Berlin: de Gruyter; 2012. p. 265-86.
- 1612 198. Evans JA, Montgomery J, Wildman G, Boulton N. Spatial Variations in Biosphere  
1613  $^{87}\text{Sr}/^{86}\text{Sr}$  in Britain. Journal of the Geological Society, London. 2010;167:1-4.
- 1614 199. Maurer A-F, Galer SJG, Knipper C, Beierlein L, Nunn EV, Peters D, et al.  
1615 Bioavailable  $^{87}\text{Sr}/^{86}\text{Sr}$  in Different Environmental Samples — Effects of Anthropogenic  
1616 Contamination and Implications for Isoscapes in Past Migration Studies. Science of the Total  
1617 Environment. 2012;433:216-29.
- 1618 200. Evans JA, Montgomery J, Wildman G. Isotope Domain Mapping of  $^{87}\text{Sr}/^{86}\text{Sr}$   
1619 Biosphere Variation on the Isla of Skye, Scotland. Journal of the Geological Society, London.  
1620 2009;166:617-31.
- 1621 201. Yanes Y, Delgado A, Castillo C, Alonso MR, Ibáñez M, De la Nuez J, et al. Stable  
1622 Isotope ( $\delta^{18}\text{O}$ ,  $\delta^{13}\text{C}$ , and  $\delta\text{D}$ ) Signatures of Recent Terrestrial Communities from a Low-

- 1623 Latitude, Oceanic Setting: Endemic Land Snails, Plants, Rain, and Carbonate Sediments from
- 1624 the Eastern Canary Islands. *Chemical Geology*. 2008;249:377-92.
- 1625 202. Cavazzuti C, Skeates R, Millard AR, Nowell G, Peterkin J, Bernabò Brea M, et al.
- 1626 Flows of People in Villages and Large Centres in Bronze Age Italy through Strontium and
- 1627 Oxygen Isotopes. *PLoS ONE*. 2019;14(1):e0209693.
- 1628 203. Knipper C. The Contribution of Infant Teeth to the Definition of Strontium Isotope
- 1629 Baselines. European Association of Archaeologists, 24th Annual Meeting, Barcelona, 5-8
- 1630 September 2018 Reflecting Futures; Barcelona: European Association of Archaeologists,
- 1631 Abstract Book; 2018. p. 171.
- 1632 204. Montgomery J, Evans JA, Powlesland D, Roberts CA. Continuity or Colonization in
- 1633 Anglo-Saxon England? Isotope Evidence for Mobility, Subsistence Practice, and Status at
- 1634 West Heslerton. *American Journal of Physical Anthropology*. 2005;126:123-38.
- 1635 205. Haak W, Lazaridis I, Patterson N, Rohland N, Mallick S, Llamas B, et al. Massive
- 1636 Migration from the Steppe was a Source for Indo-European Languages in Europe. *Nature*.
- 1637 2015;522(7555):207-11.
- 1638 206. Fleming DE. *Democracy's Ancient Ancestors: Mari and Early Collective Governance*.
- 1639 Cambridge: Cambridge University Press; 2004.
- 1640 207. Michalowski P. The Correspondence of the Kings of Ur. An Epistolary History of an
- 1641 Ancient Mesopotamian Kingdom. Cooper JS, editor. Winona Lake: Eisenbrauns; 2011.
- 1642 208. Burke AA. Amorites, Climate Change, and the Negotiation of Identity at the End of
- 1643 the Third Millennium B.C. In: Höflmayer F, editor. *The Late Third Millennium in the Ancient*
- 1644 *Near East Chronology, C14, and Climate Change*. Oriental Institute Seminars. Chicago: The
- 1645 Oriental Institute of the University of Chicago; 2017.
- 1646 209. Salvini M. The Earliest Evidences of the Hurrians Before the Formation of the Reign
- 1647 of Mitanni. In: Buccellati G, Kelly-Buccellati M, editors. *Urkesh and the Hurrians Studies in*
- 1648 *Honor of Lloyd Cotsen*. Urkesh/Mozan Studies

- 1649 Bibliotheca Mesopotamica. Malibu: Undena Publications; 1998. p. 99-115.
- 1650 210. Wilhelm G. The Hurrians. Warminsster: Aris & Phillips Ltd; 1989.
- 1651 211. Steinkeller P. The Historical Background of Urkesh and the Hurrian Beginnings in
- 1652 Northern Mesopotamia. In: Buccellati G, Kelly-Buccellati M, editors. Urkesh and the
- 1653 Hurrians Studies in Honor of Lloyd Cotsen. Urkesh/Mozan Studies
- 1654 Bibliotheca Mesopotamica. Malibu: Undena Publications; 1998. p. 75-98.
- 1655 212. Akar M, Kara D. The Formation of Collective, Political and Cultural Memory in the
- 1656 Middle Bronze Age: Foundation and Termination Rituals at Toprakhisar Höyük. Anatolian
- 1657 Studies. 2020;70:1-27.
- 1658 213. Scott GR, Irish JD. Human Tooth Crown and Root Morphology. The Arizona State
- 1659 University Dental Anthropology System. Cambridge: Cambridge University Press; 2017.
- 1660 214. Yener KA, Yazıcıoğlu GB. Excavation Results. In: Yener KA, editor. The Amuq
- 1661 Valley Regional Projects: Excavations in the Plain of Antioch: Tell Atchana, Ancient
- 1662 Alalakh, Vol 1: The 2003-2004 Excavation Seasons. Istanbul: Koç University; 2010. p. 11-49.
- 1663 215. Haber M, Nassar J, Almarri MA, Saupe T, Saag L, Griffith SJ, et al. A Genetic
- 1664 History of the Near East from an aDNA Time Course Sampling Eight Points in the Past 4,000
- 1665 Years. The American Journal of Human Genetics. 2020;107:149-57.

1666

1667 **Text supplements**

1668 **S1 Text. The chronology of the burials: detailed analysis of stratigraphy and**

1669 **radiocarbon dating.**

1670 **S2 Text. Discussion of the modern snail shells and their underlying geology.**

1671 **S3 Text. Comparison between modern environmental  $^{87}\text{Sr}/^{86}\text{Sr}$  ratios in Meiggs [128]**

1672 **and the samples in this study.**

1673

1674 **Table supplements**

1675 **S1 Table. Isotopic results of all individuals, with sampled tooth indicated.**

1676 **S2 Table. Admixture modeling results.**

1677

1678

1679

1680







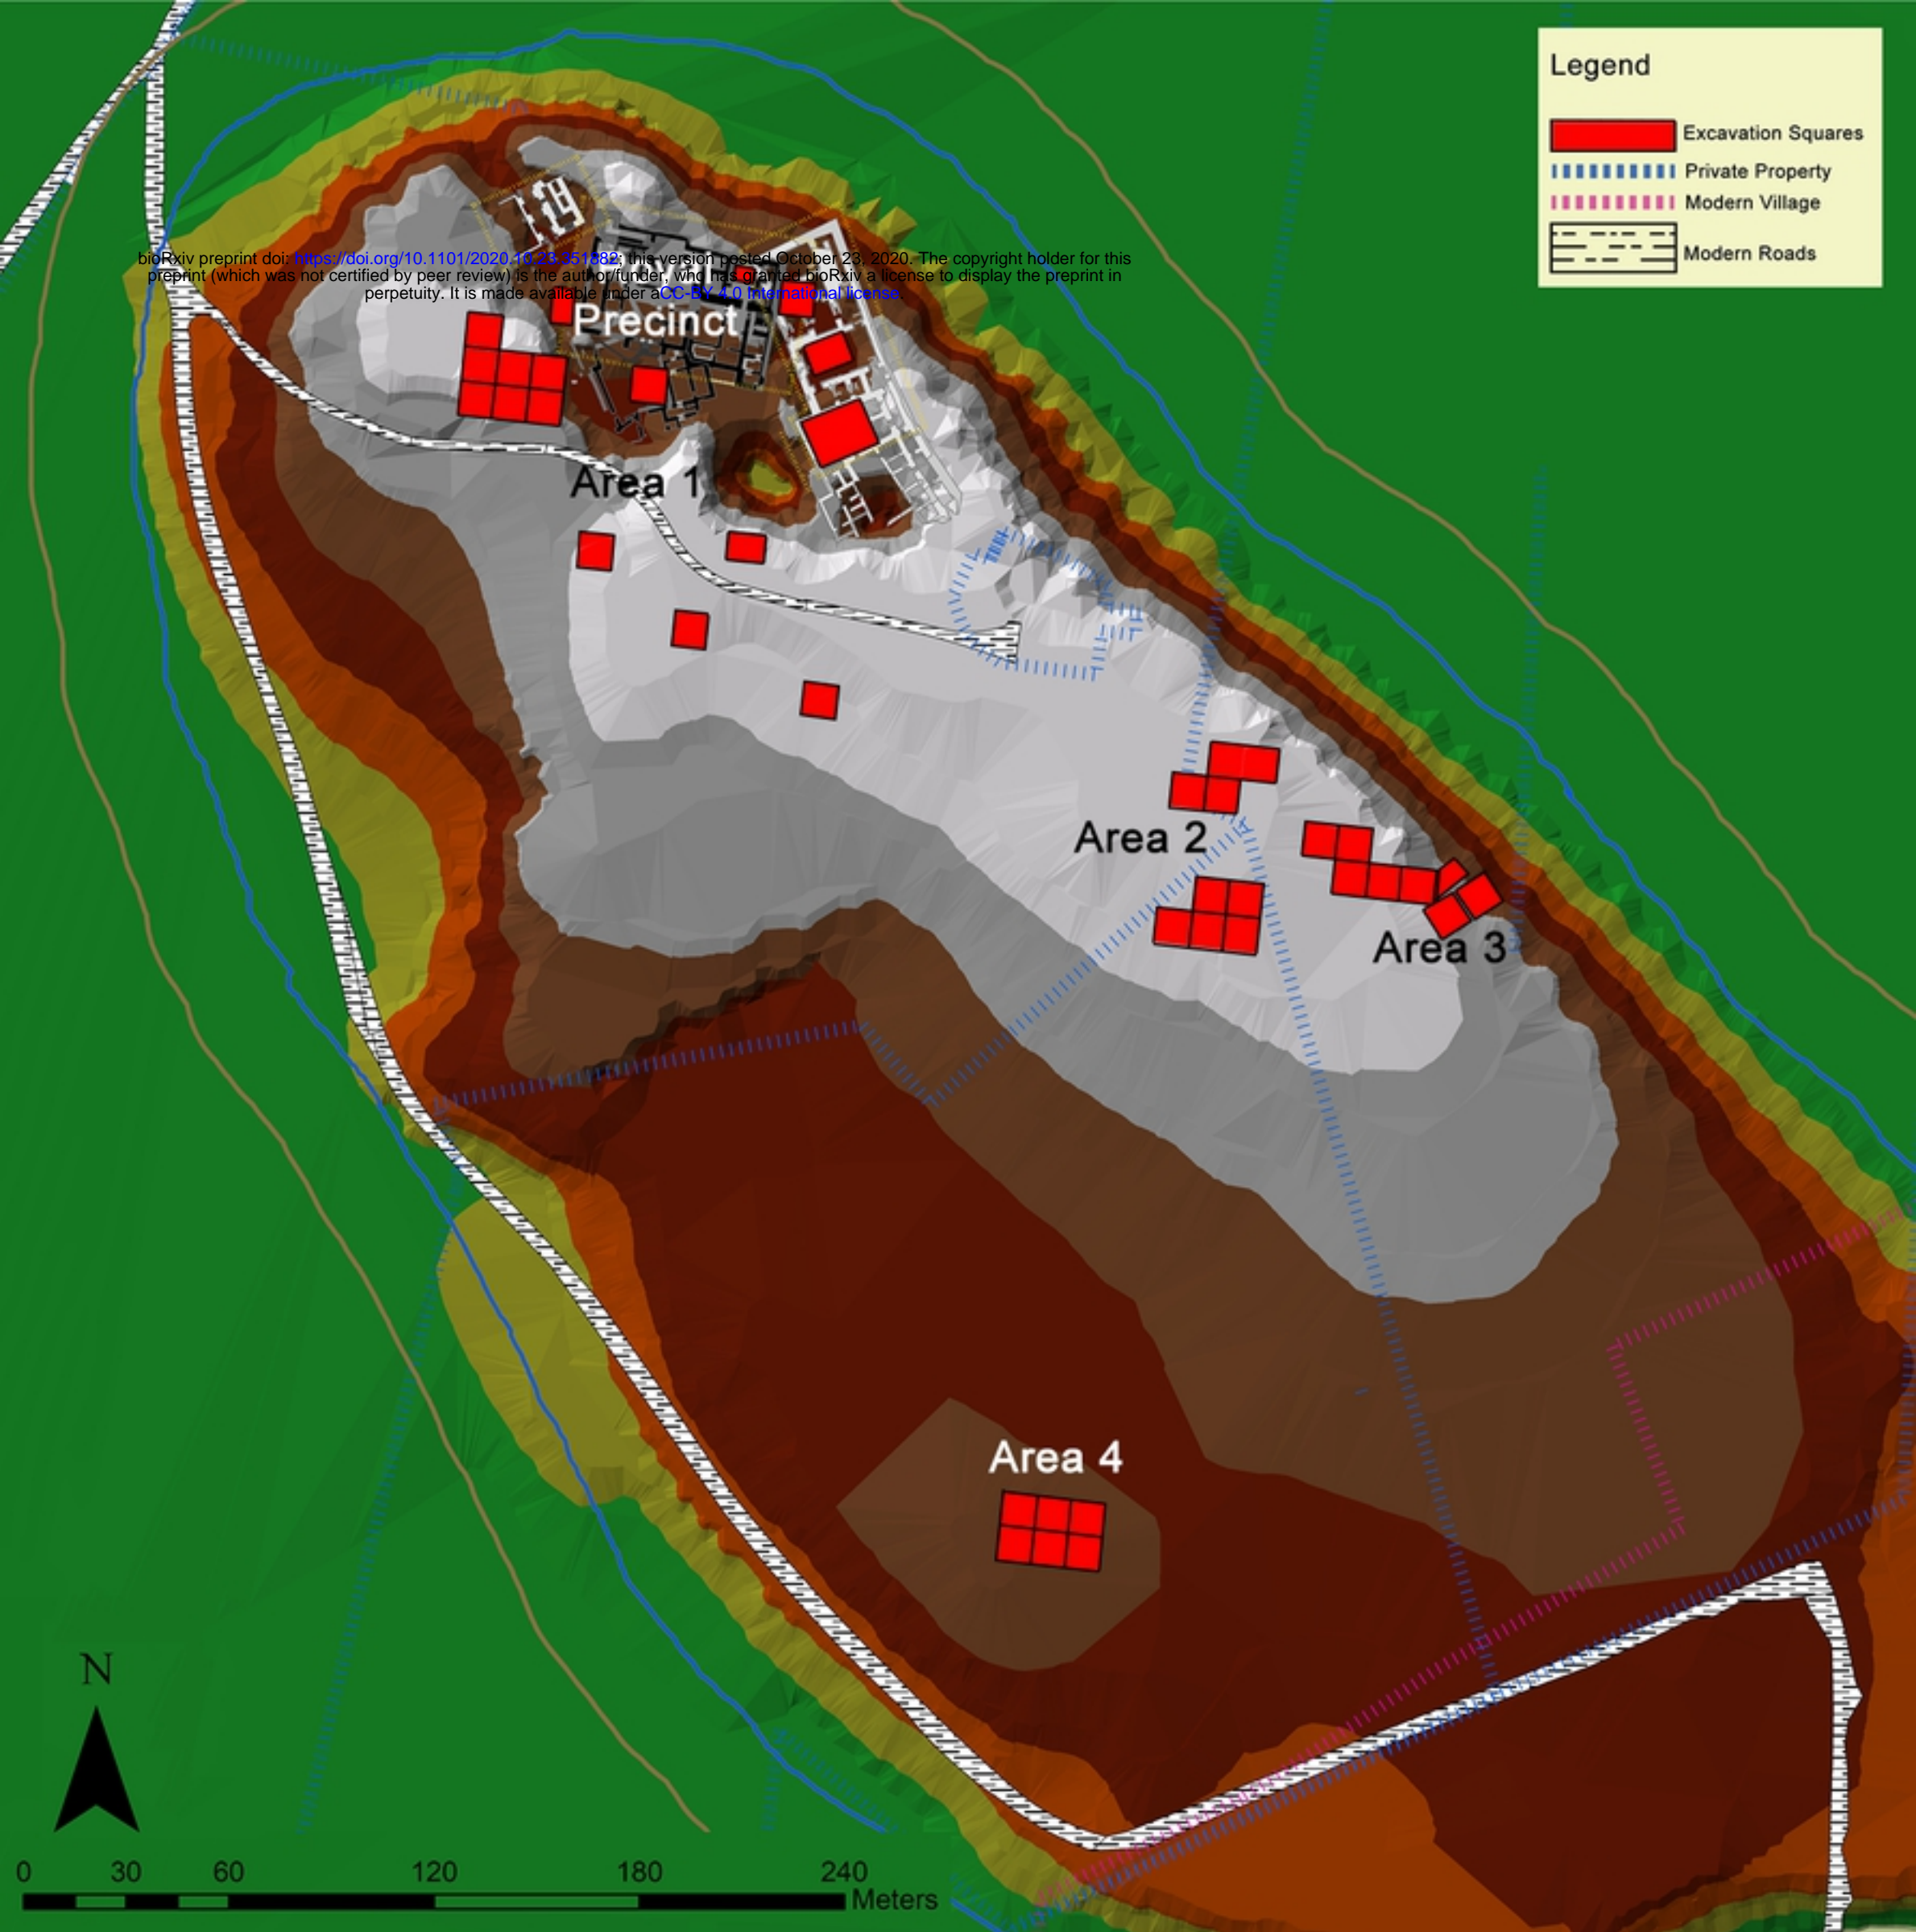

Figure2

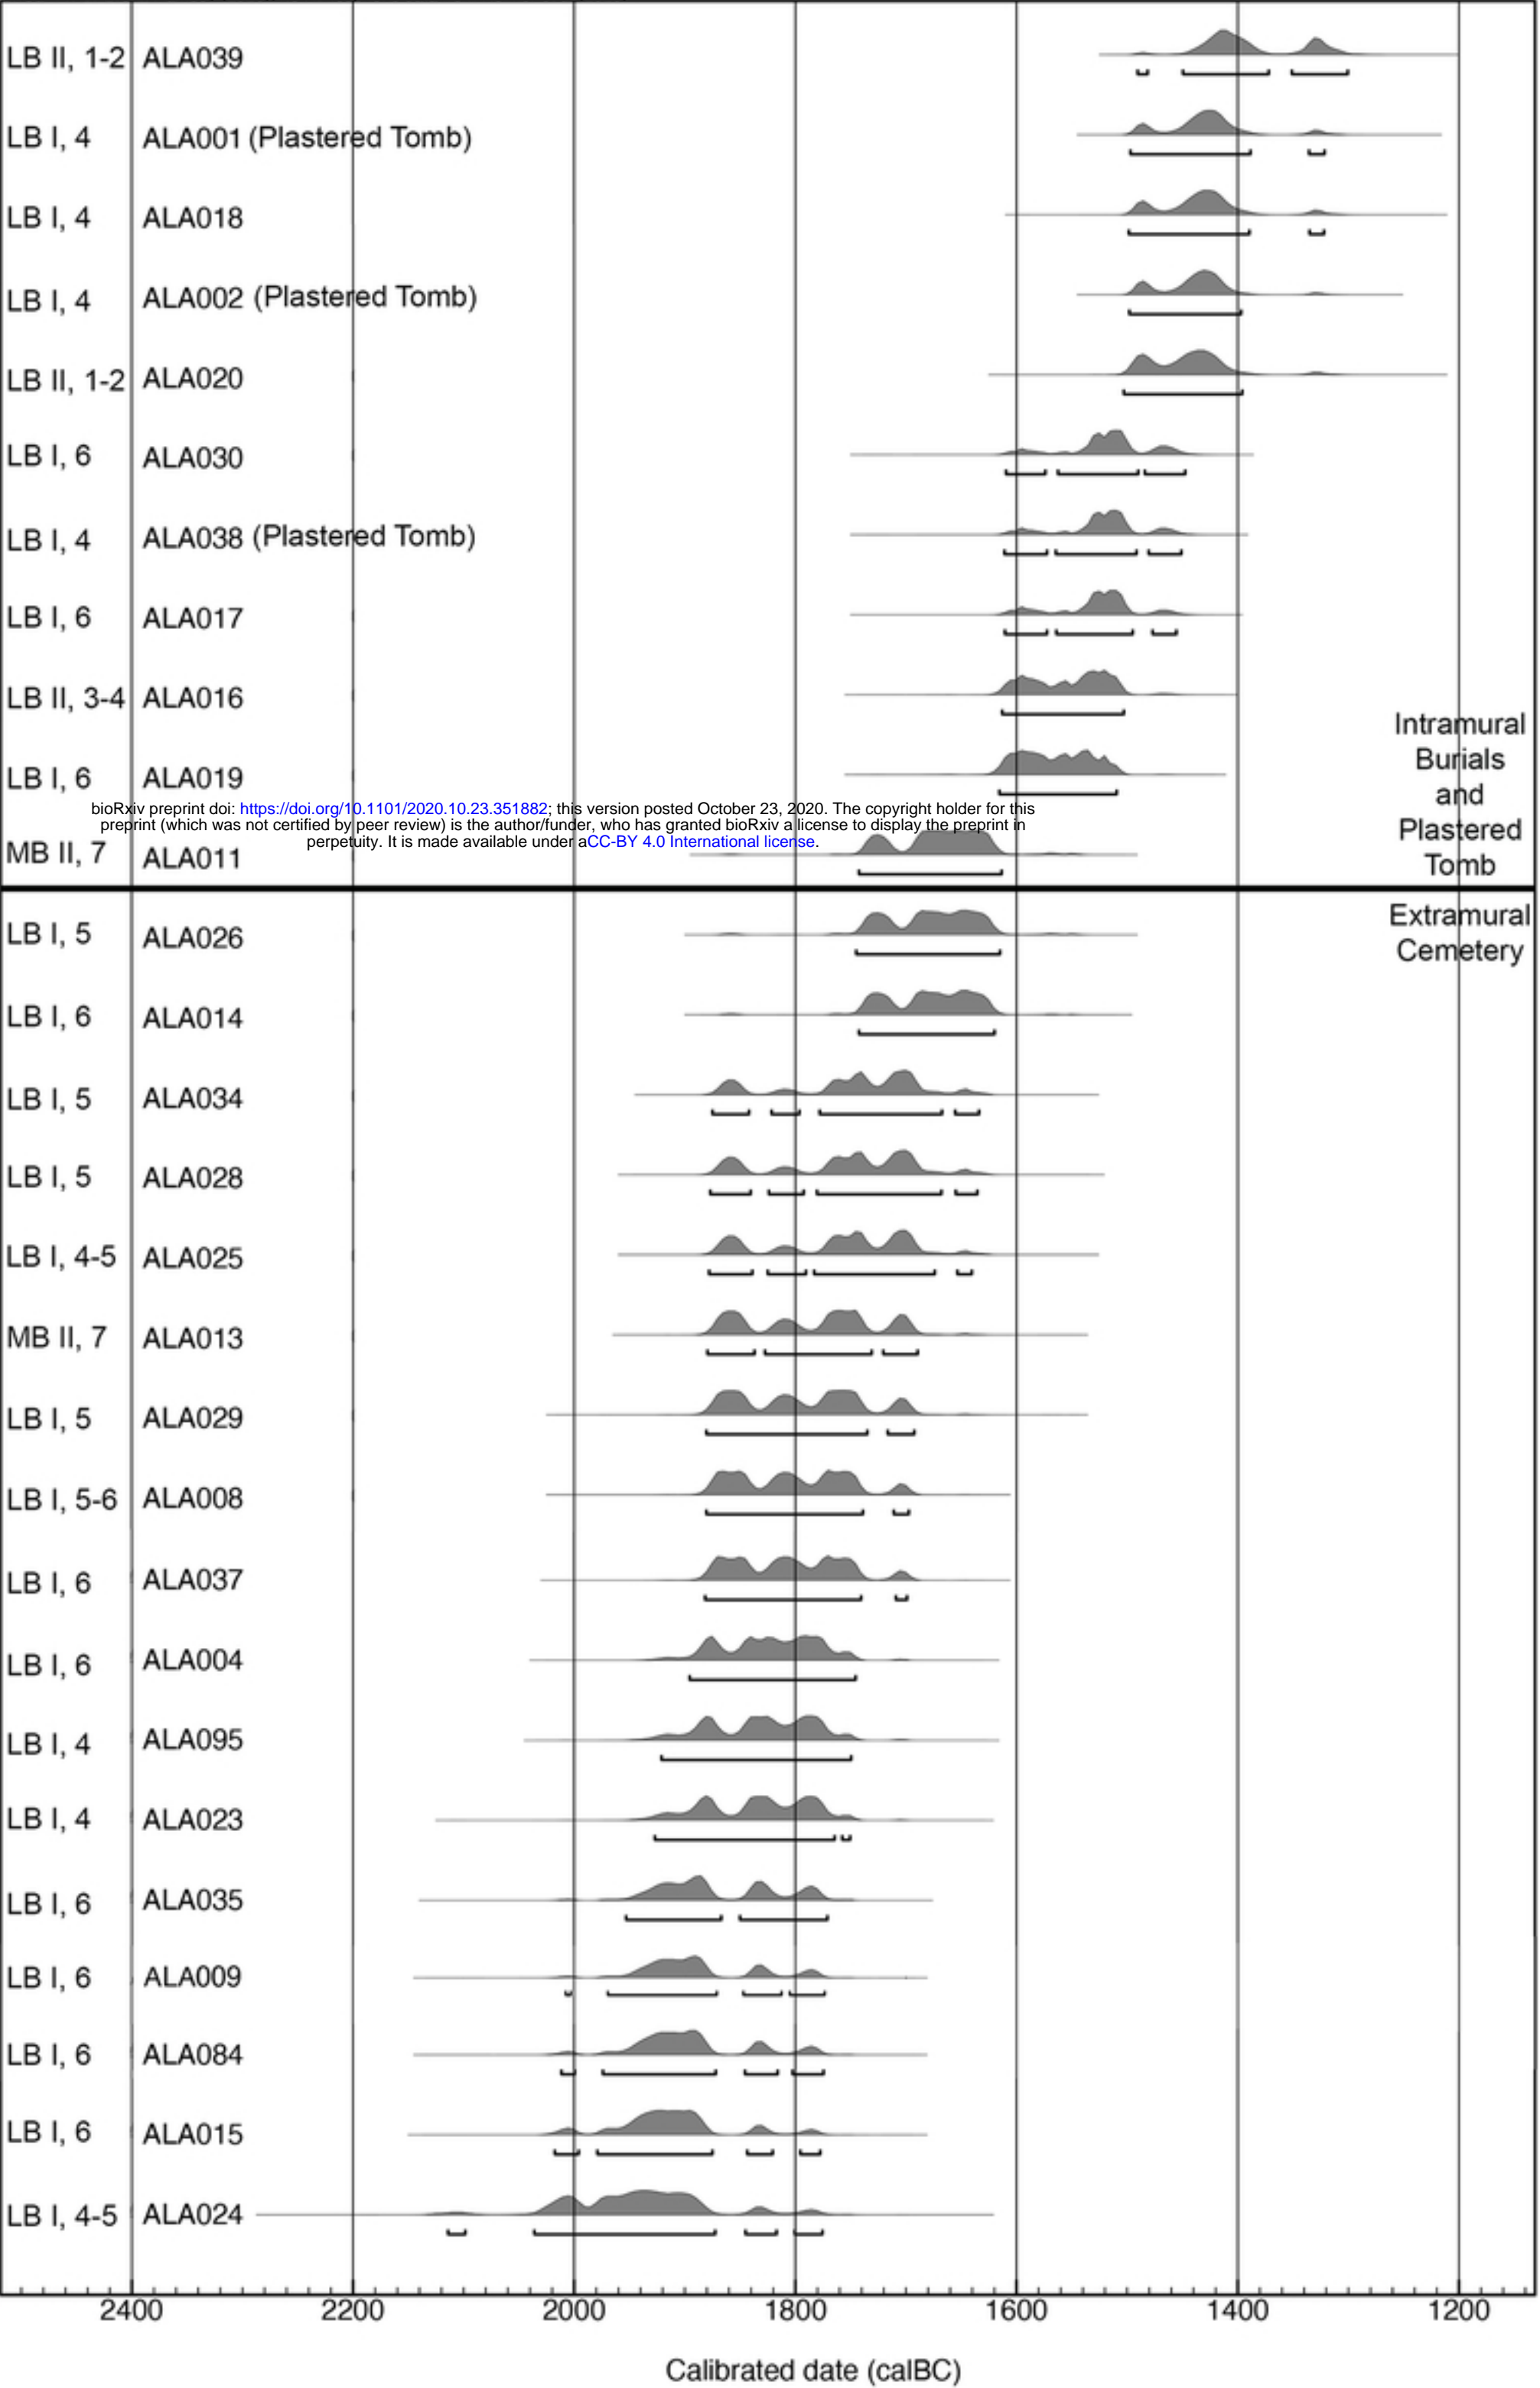

Figure3

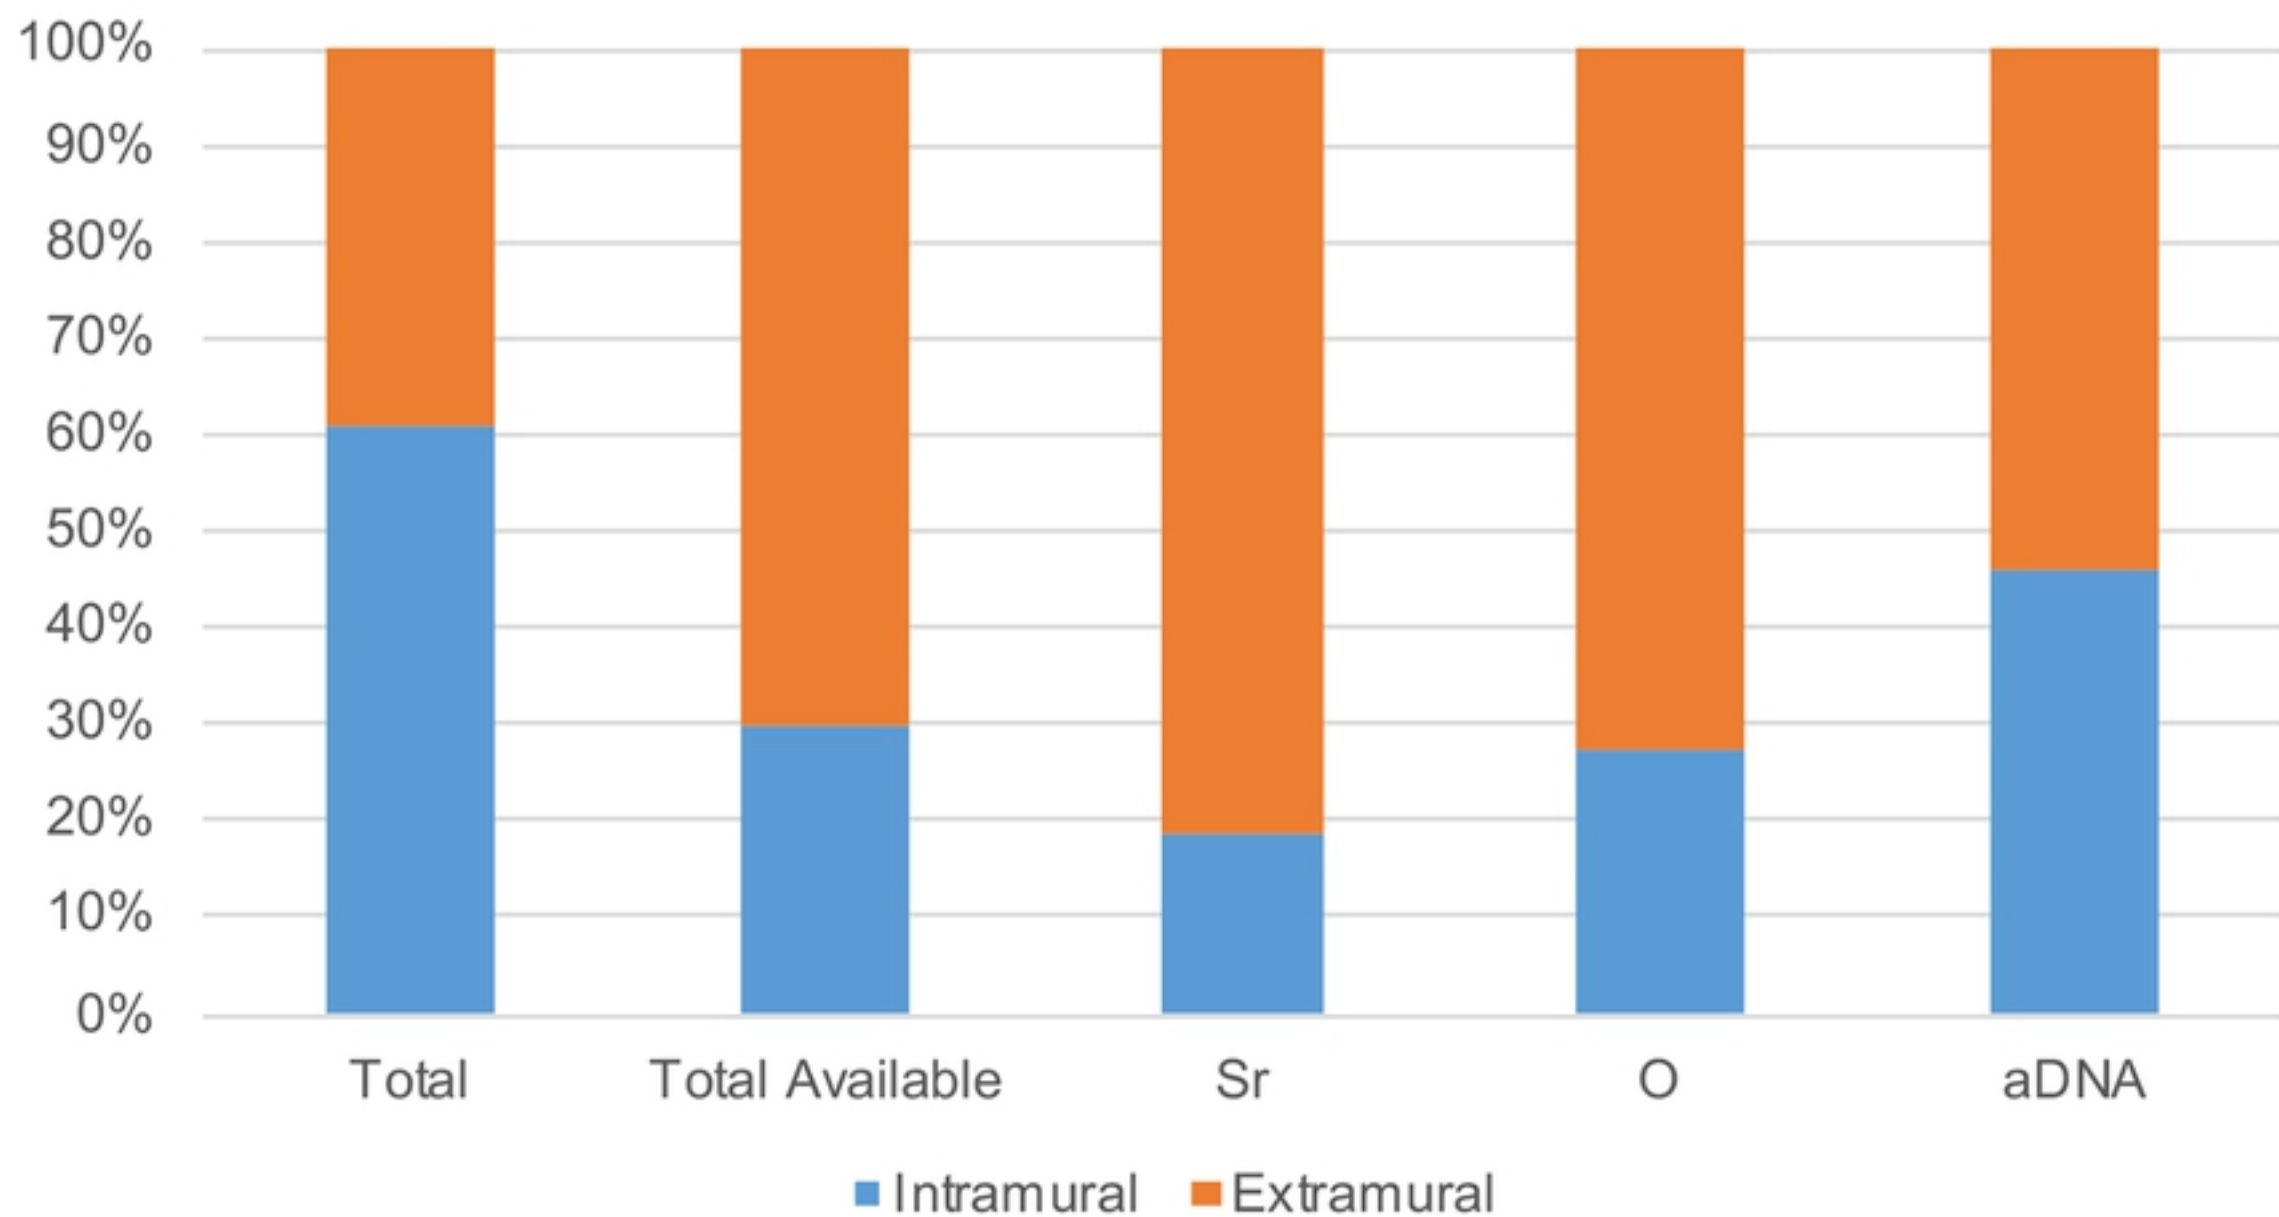

Figure4



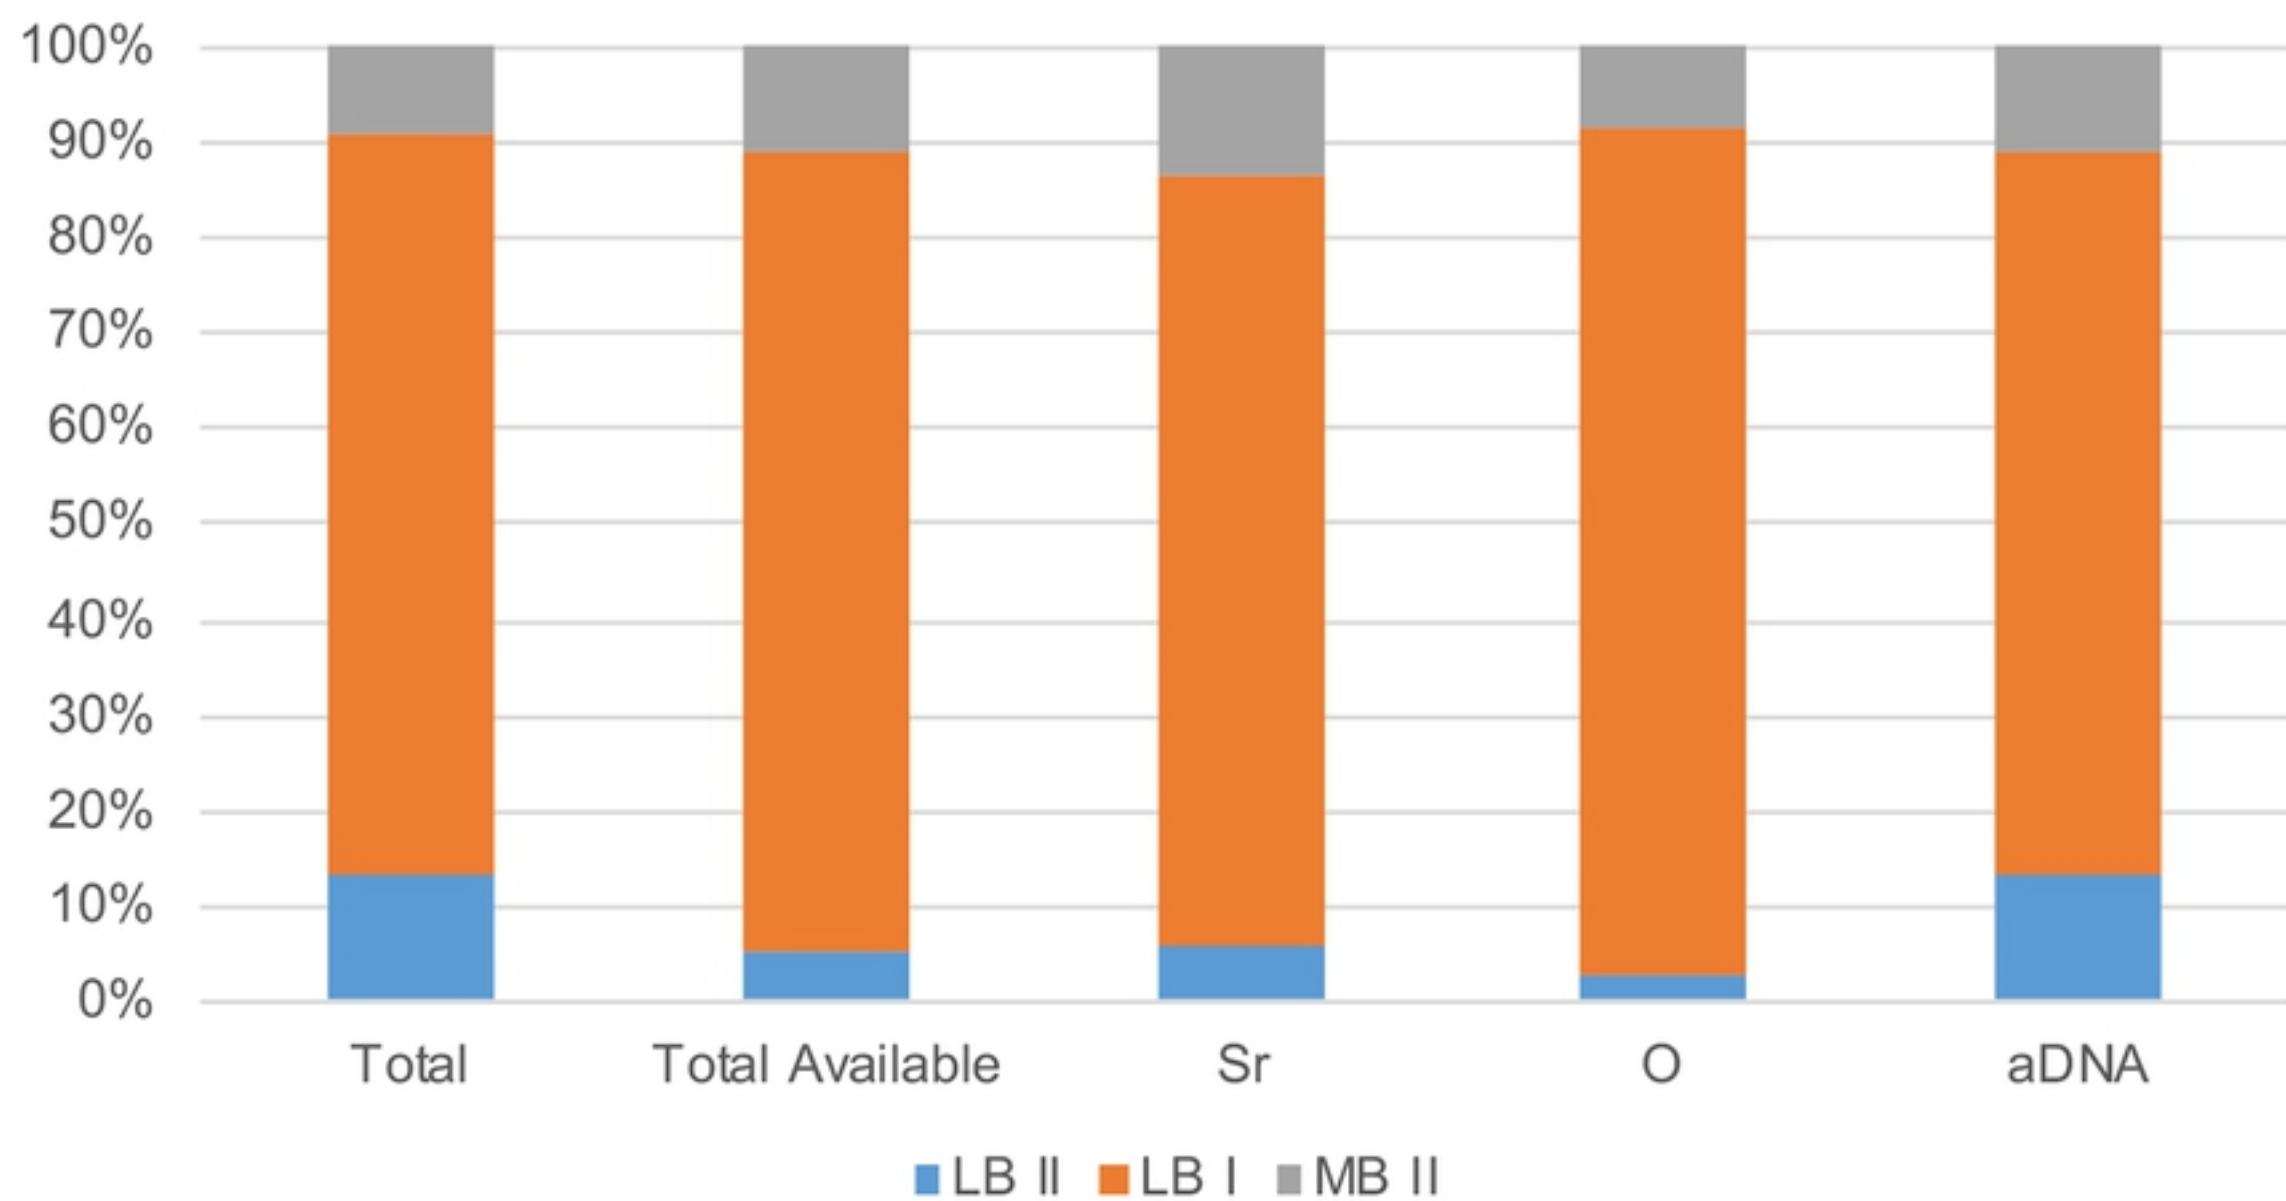

Figure5

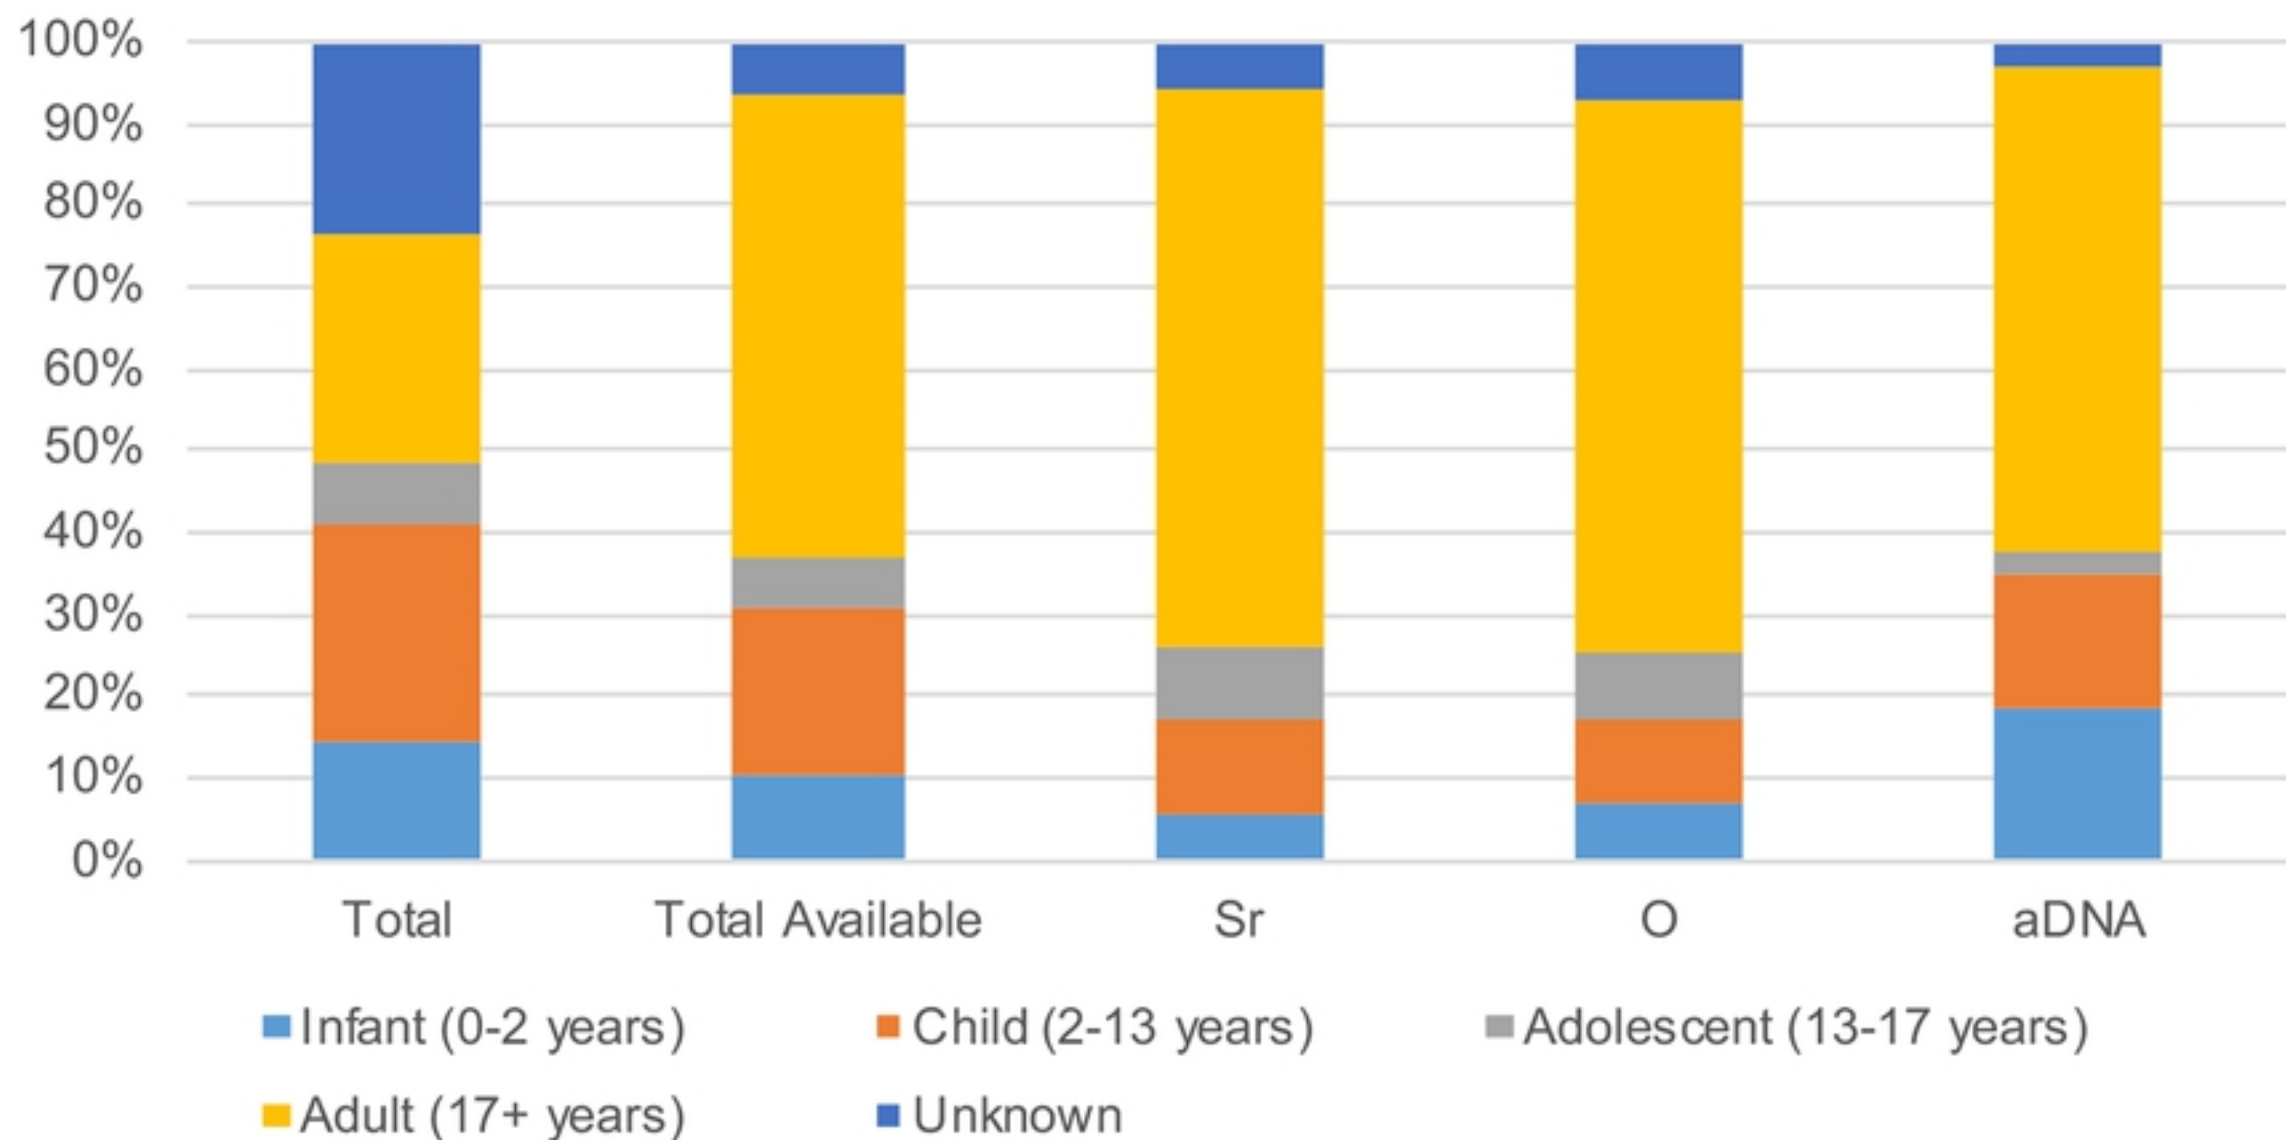

Figure6

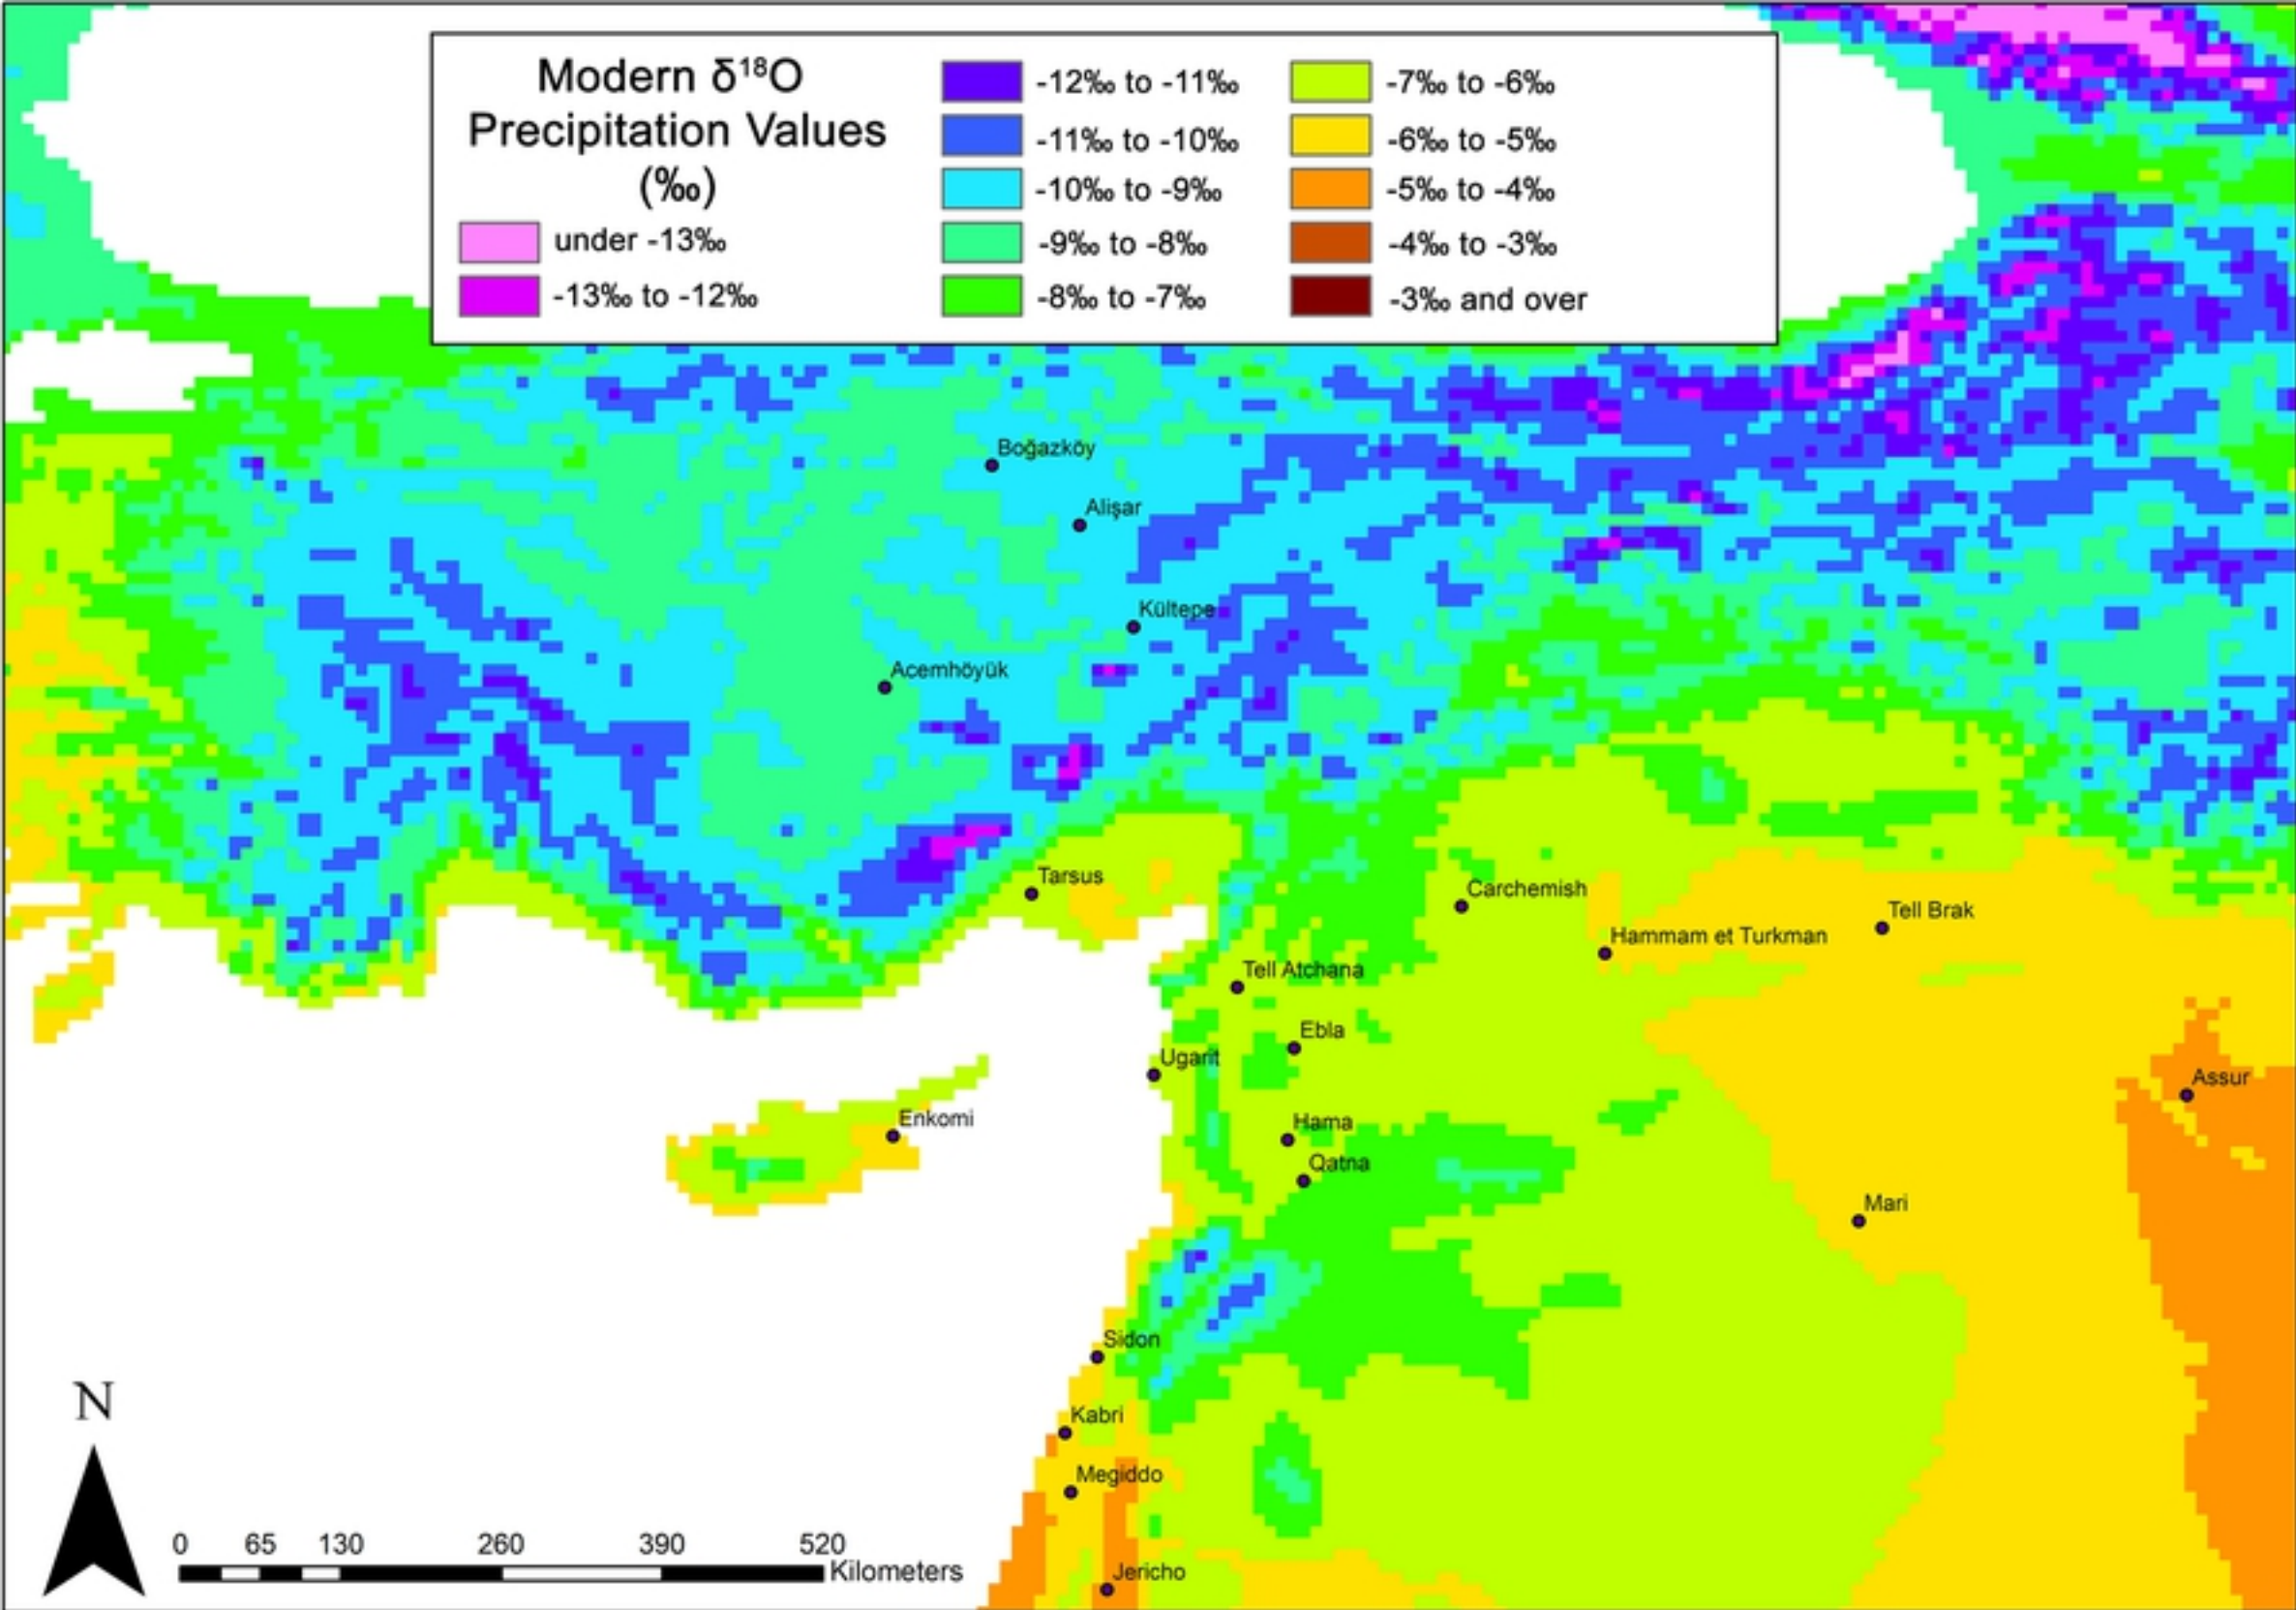

Figure7



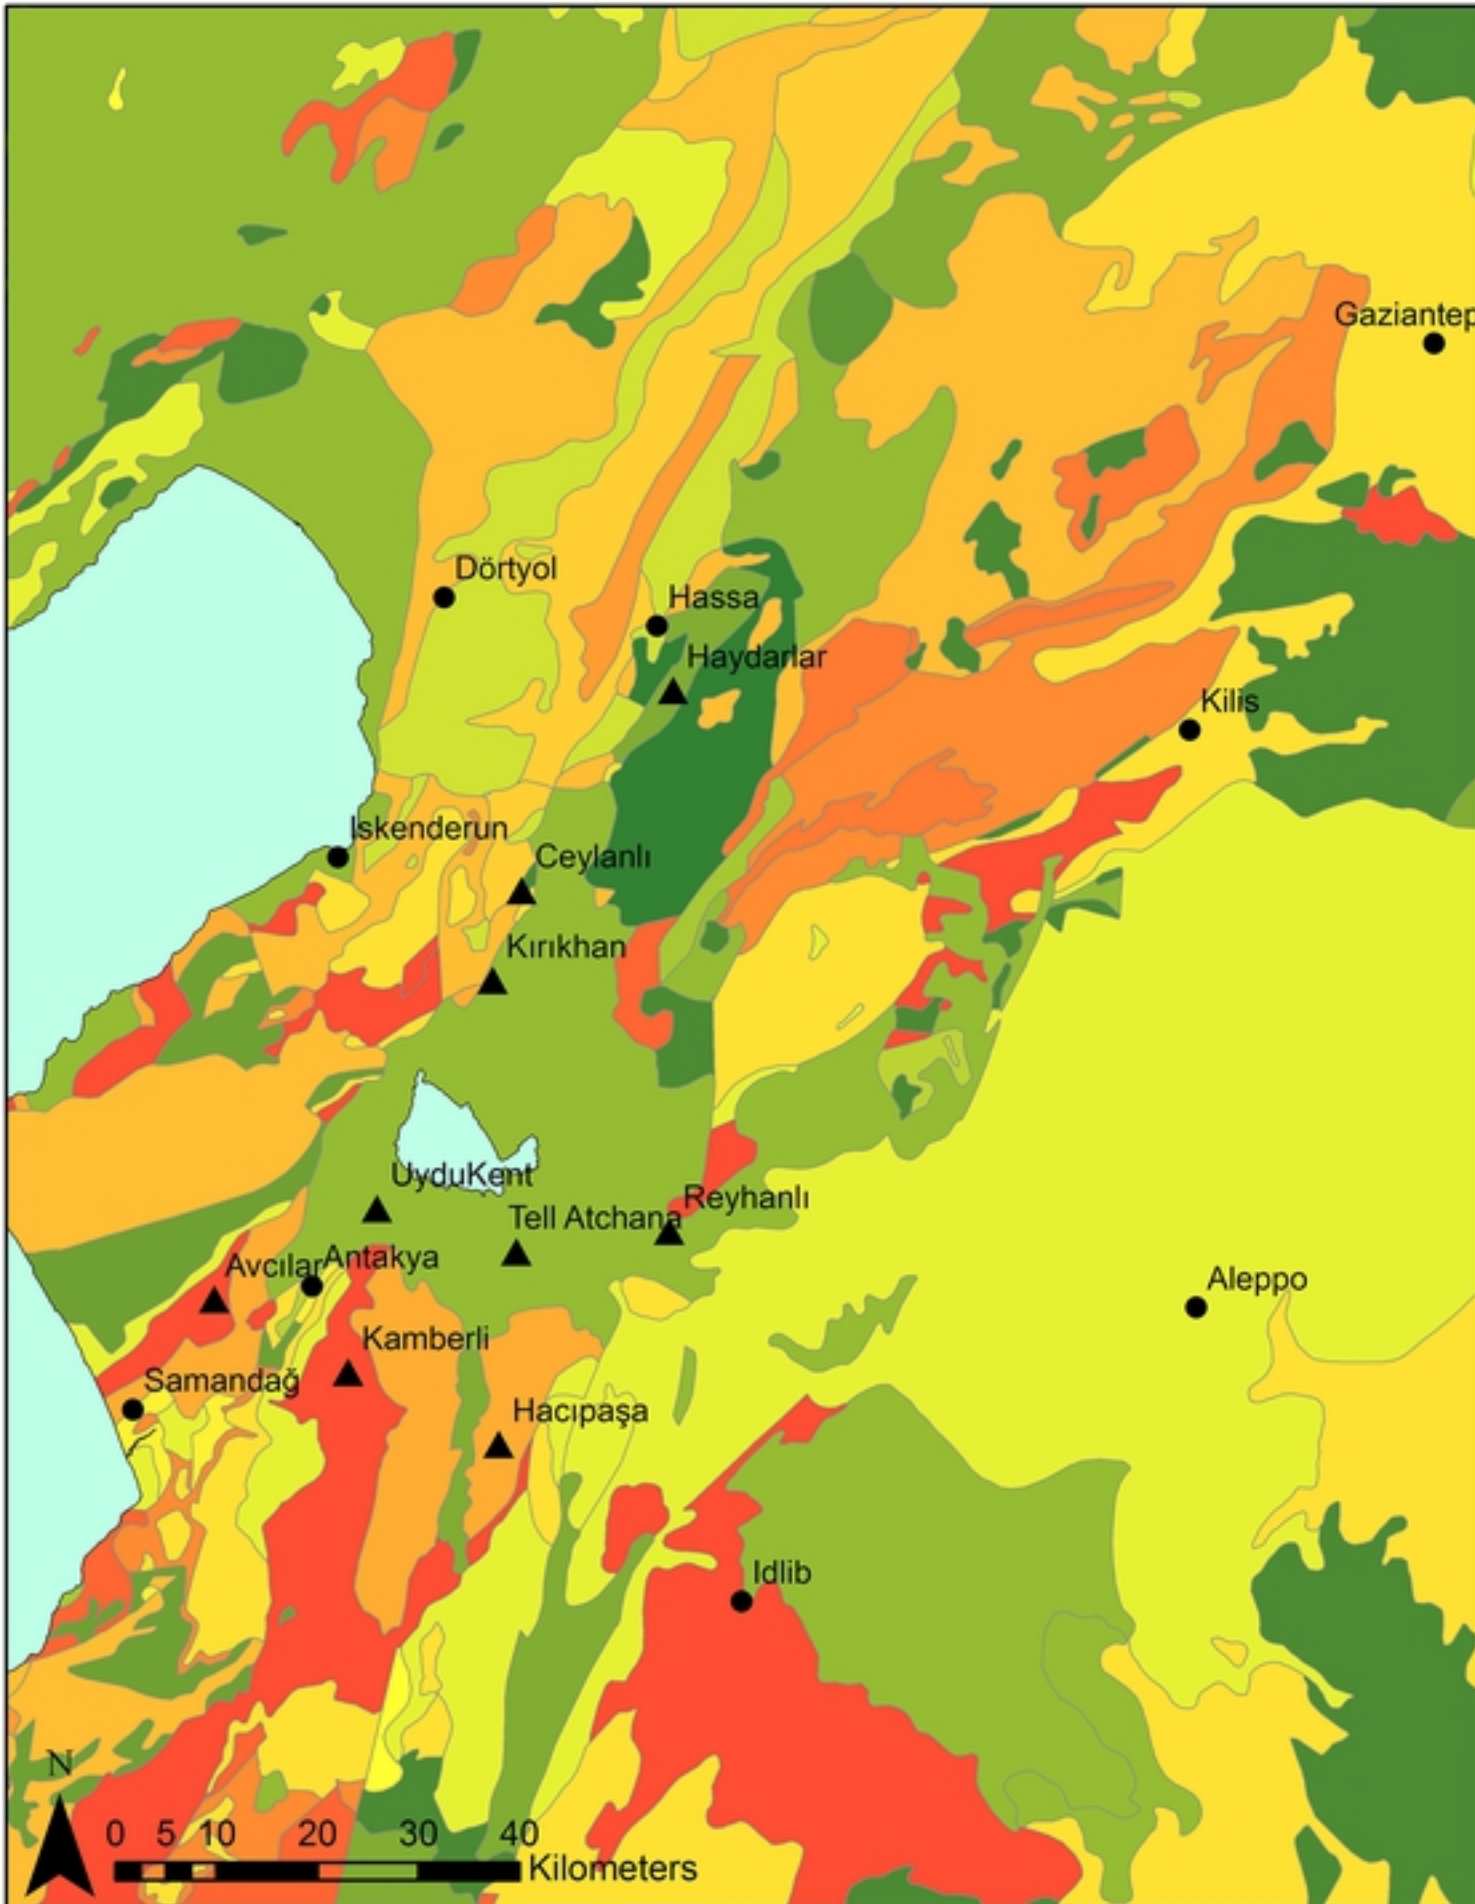

## Legend

▲ Shell Samples

● Modern Cities

- Basalt - Jurassic & Cretaceous
- Basalt - Neogenic & Quaternary Deposits
- Basalt Undifferentiated
- Gabbros, Dolerite Deposits
- Holocene Recent Alluvial Deposits
- Holocene Recent Lake Deposits
- Jurassic Undifferentiated
- Lower Miocene
- Mesozoic Undifferentiated
- Miocene Undifferentiated
- Neogene Lake Sediments
- Non-Differentiated Greenstones
- Paleogenic
- Paleozoic Undifferentiated
- Periodites, Serpentine
- Pliocene Marine Deposits
- Precambrian Deposits
- Upper Cretaceous 'Crayeux' Deposits
- Upper Cretaceous Calcareous Deposits
- Upper Cretaceous Undifferentiated
- Upper Miocene

Figure8



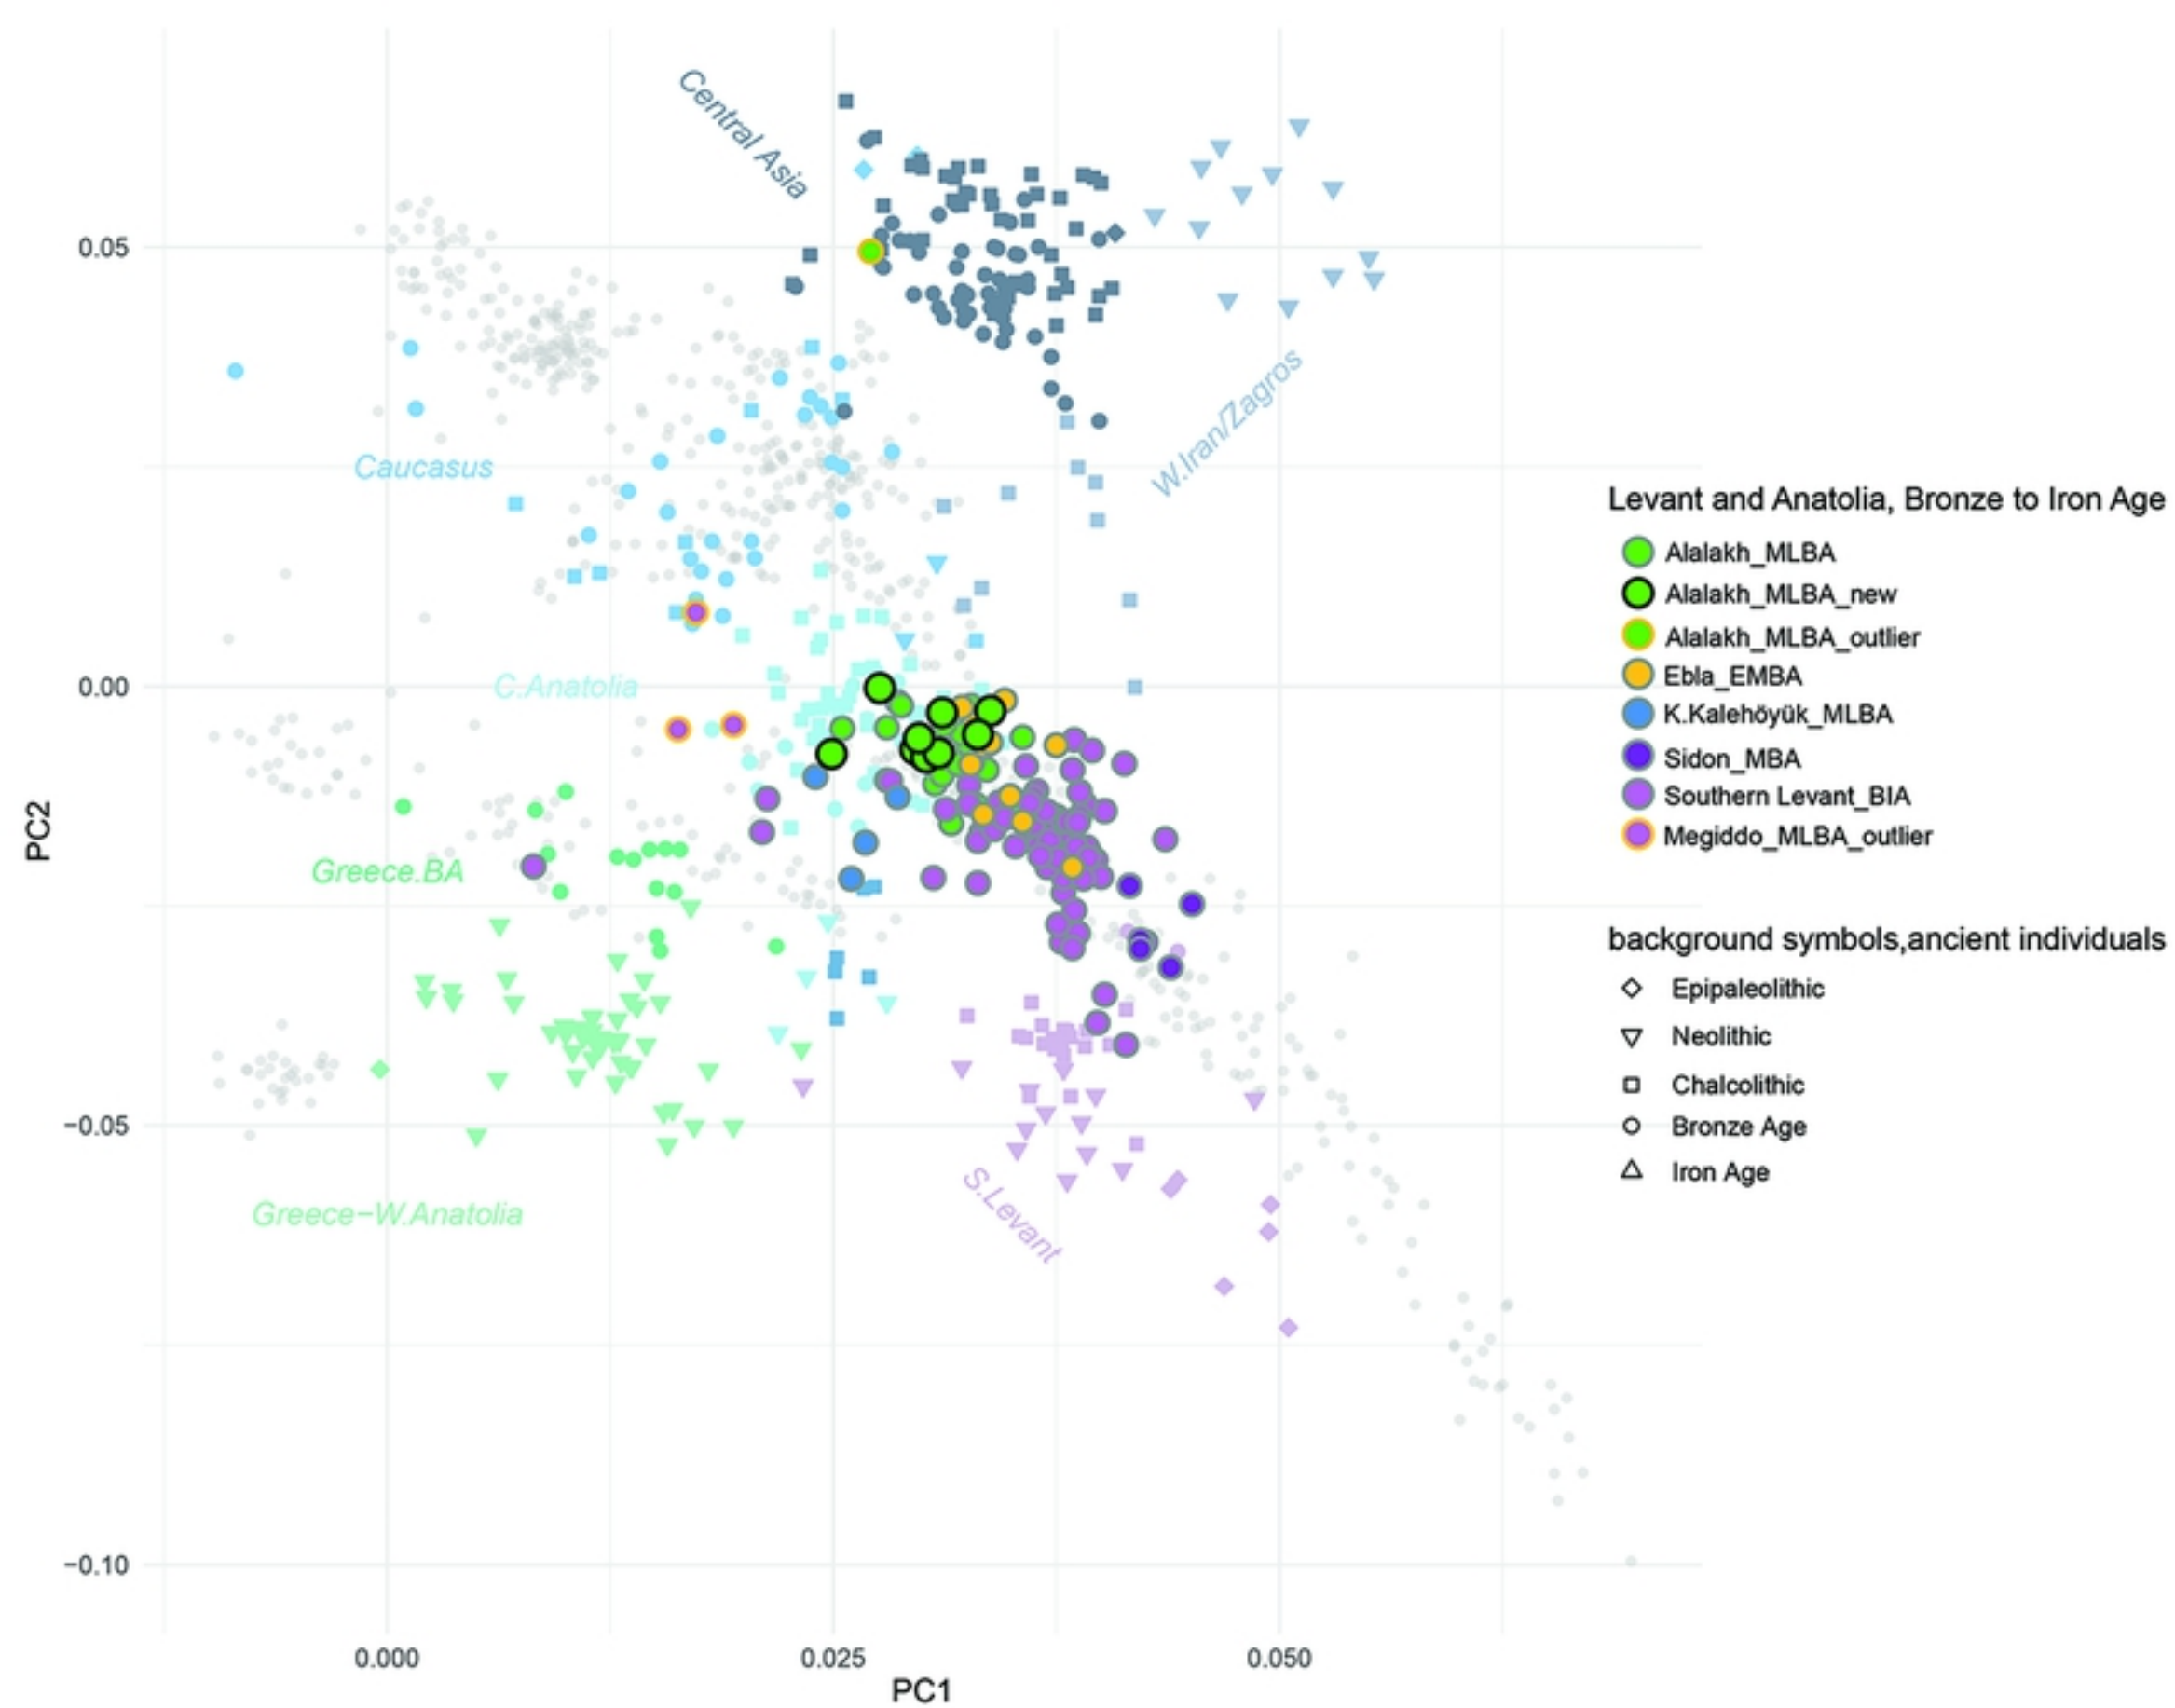

Figure9

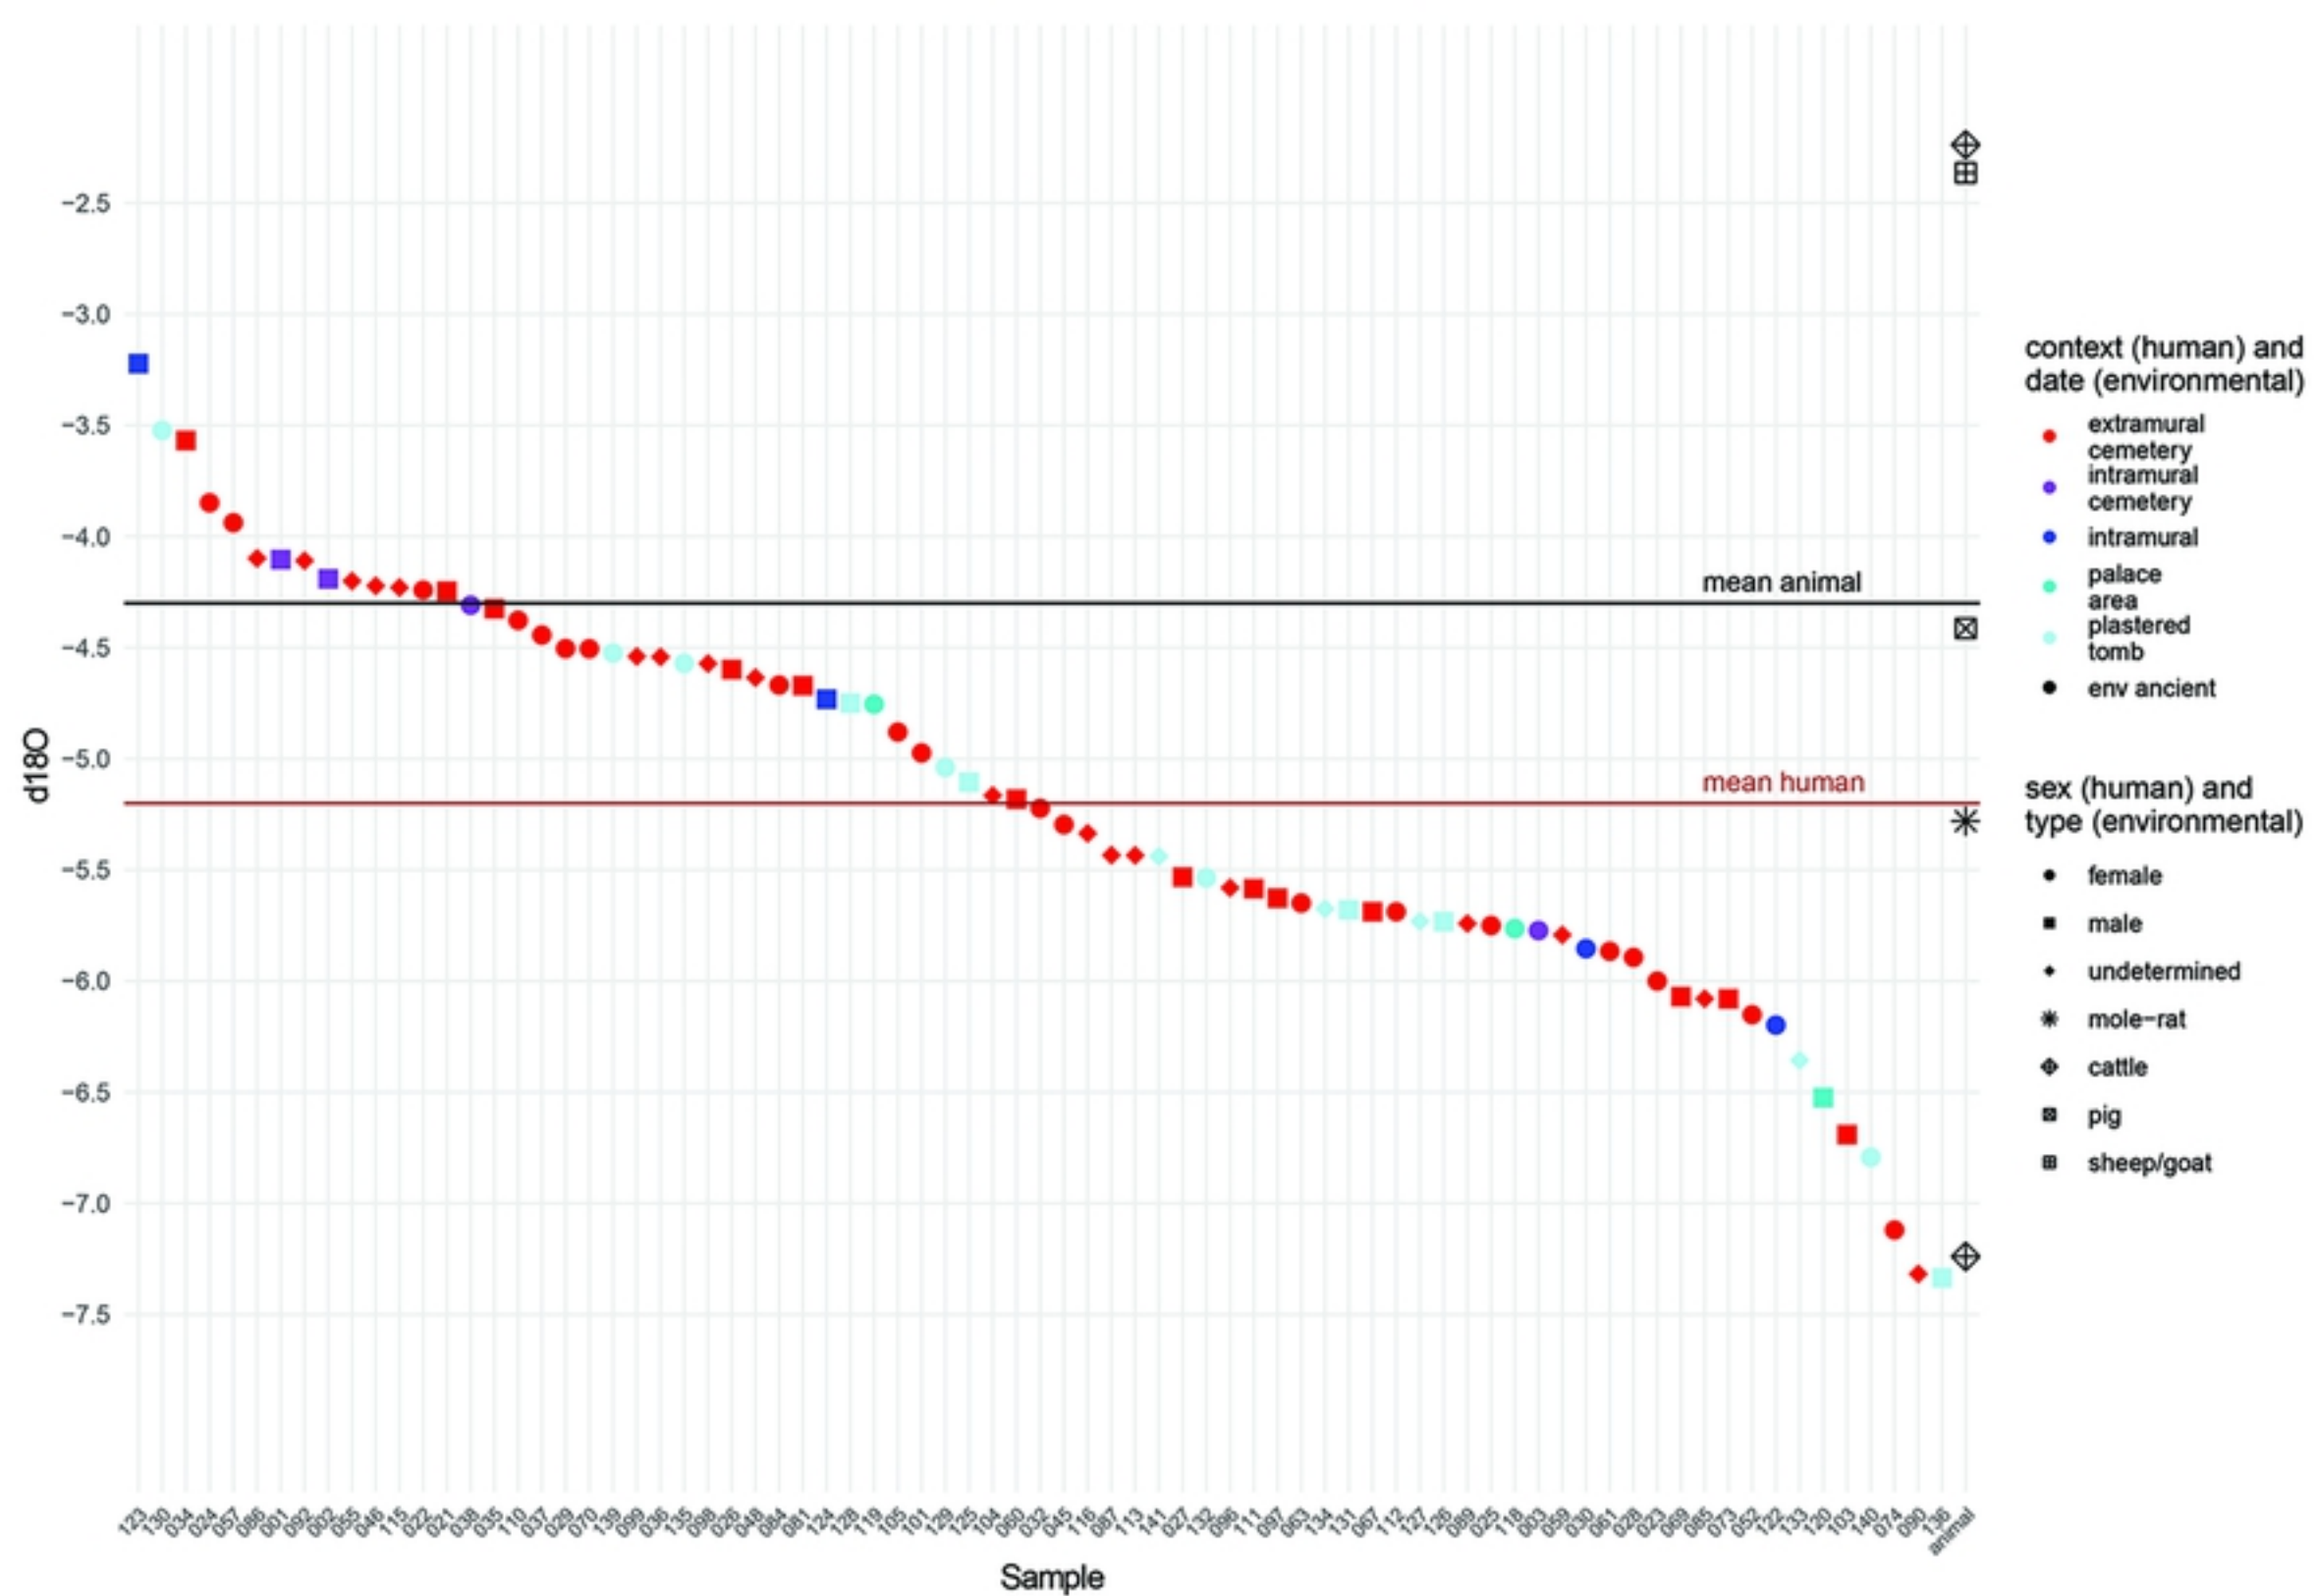

Figure10

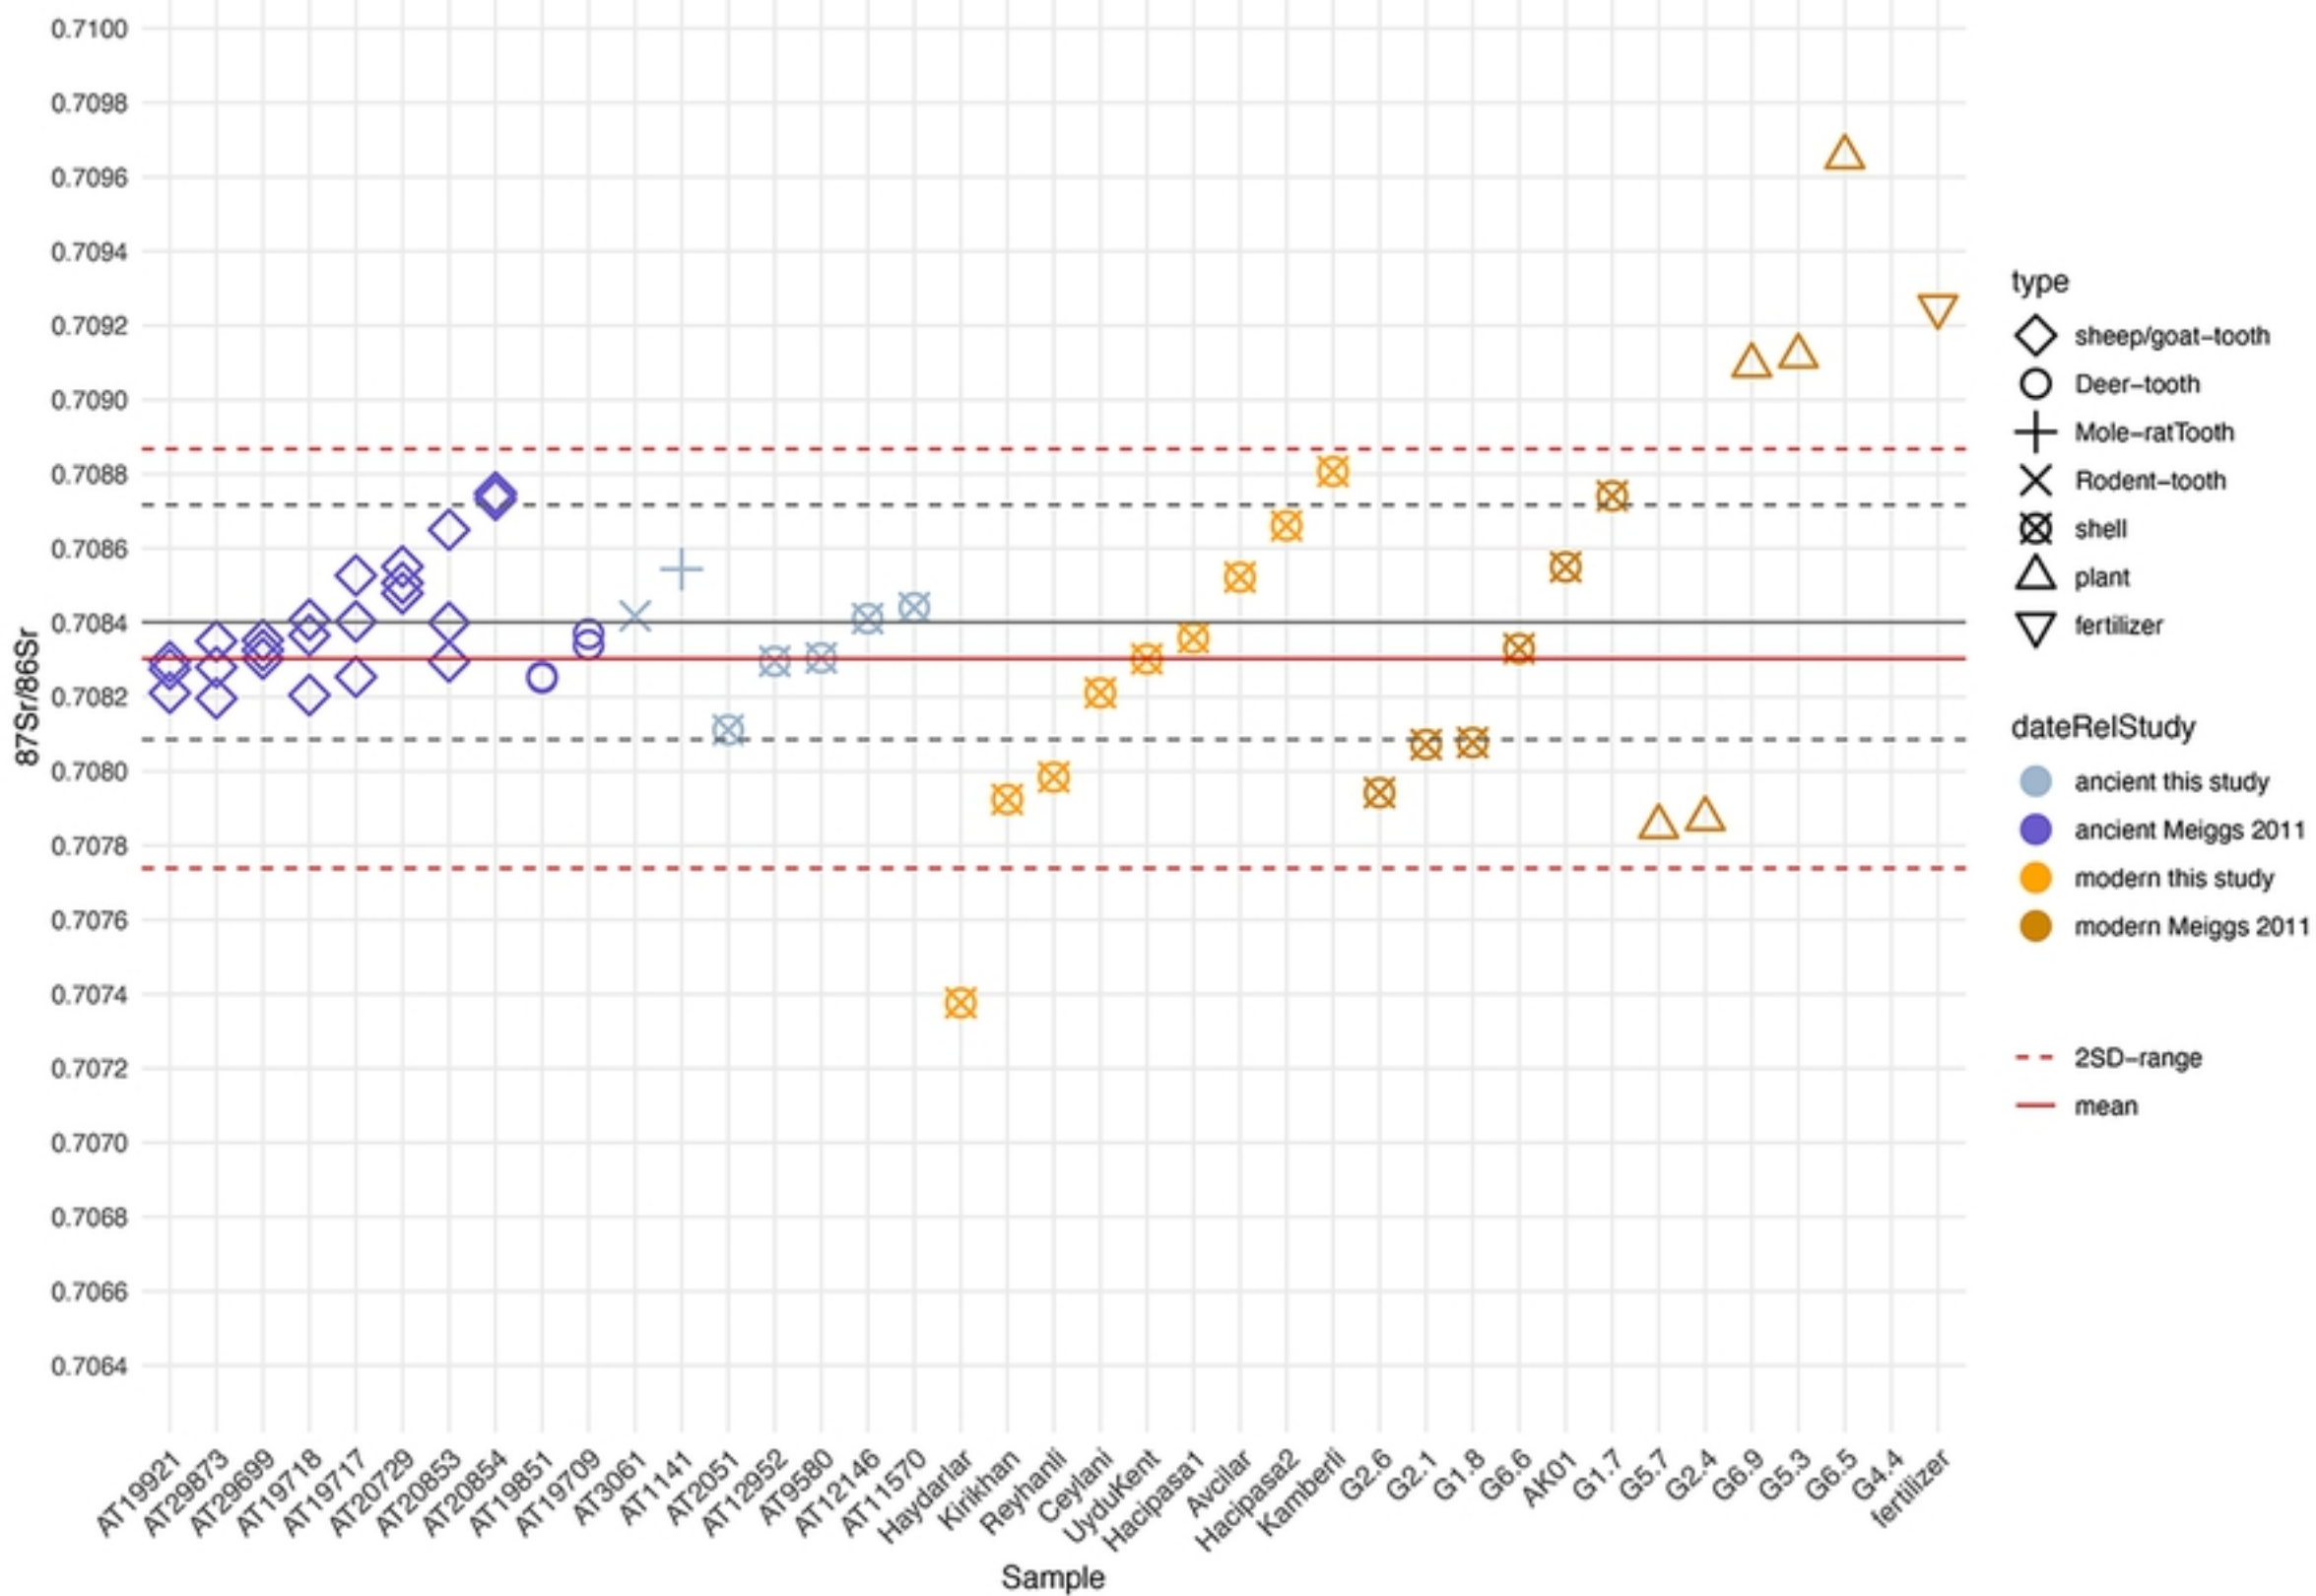

Figure11

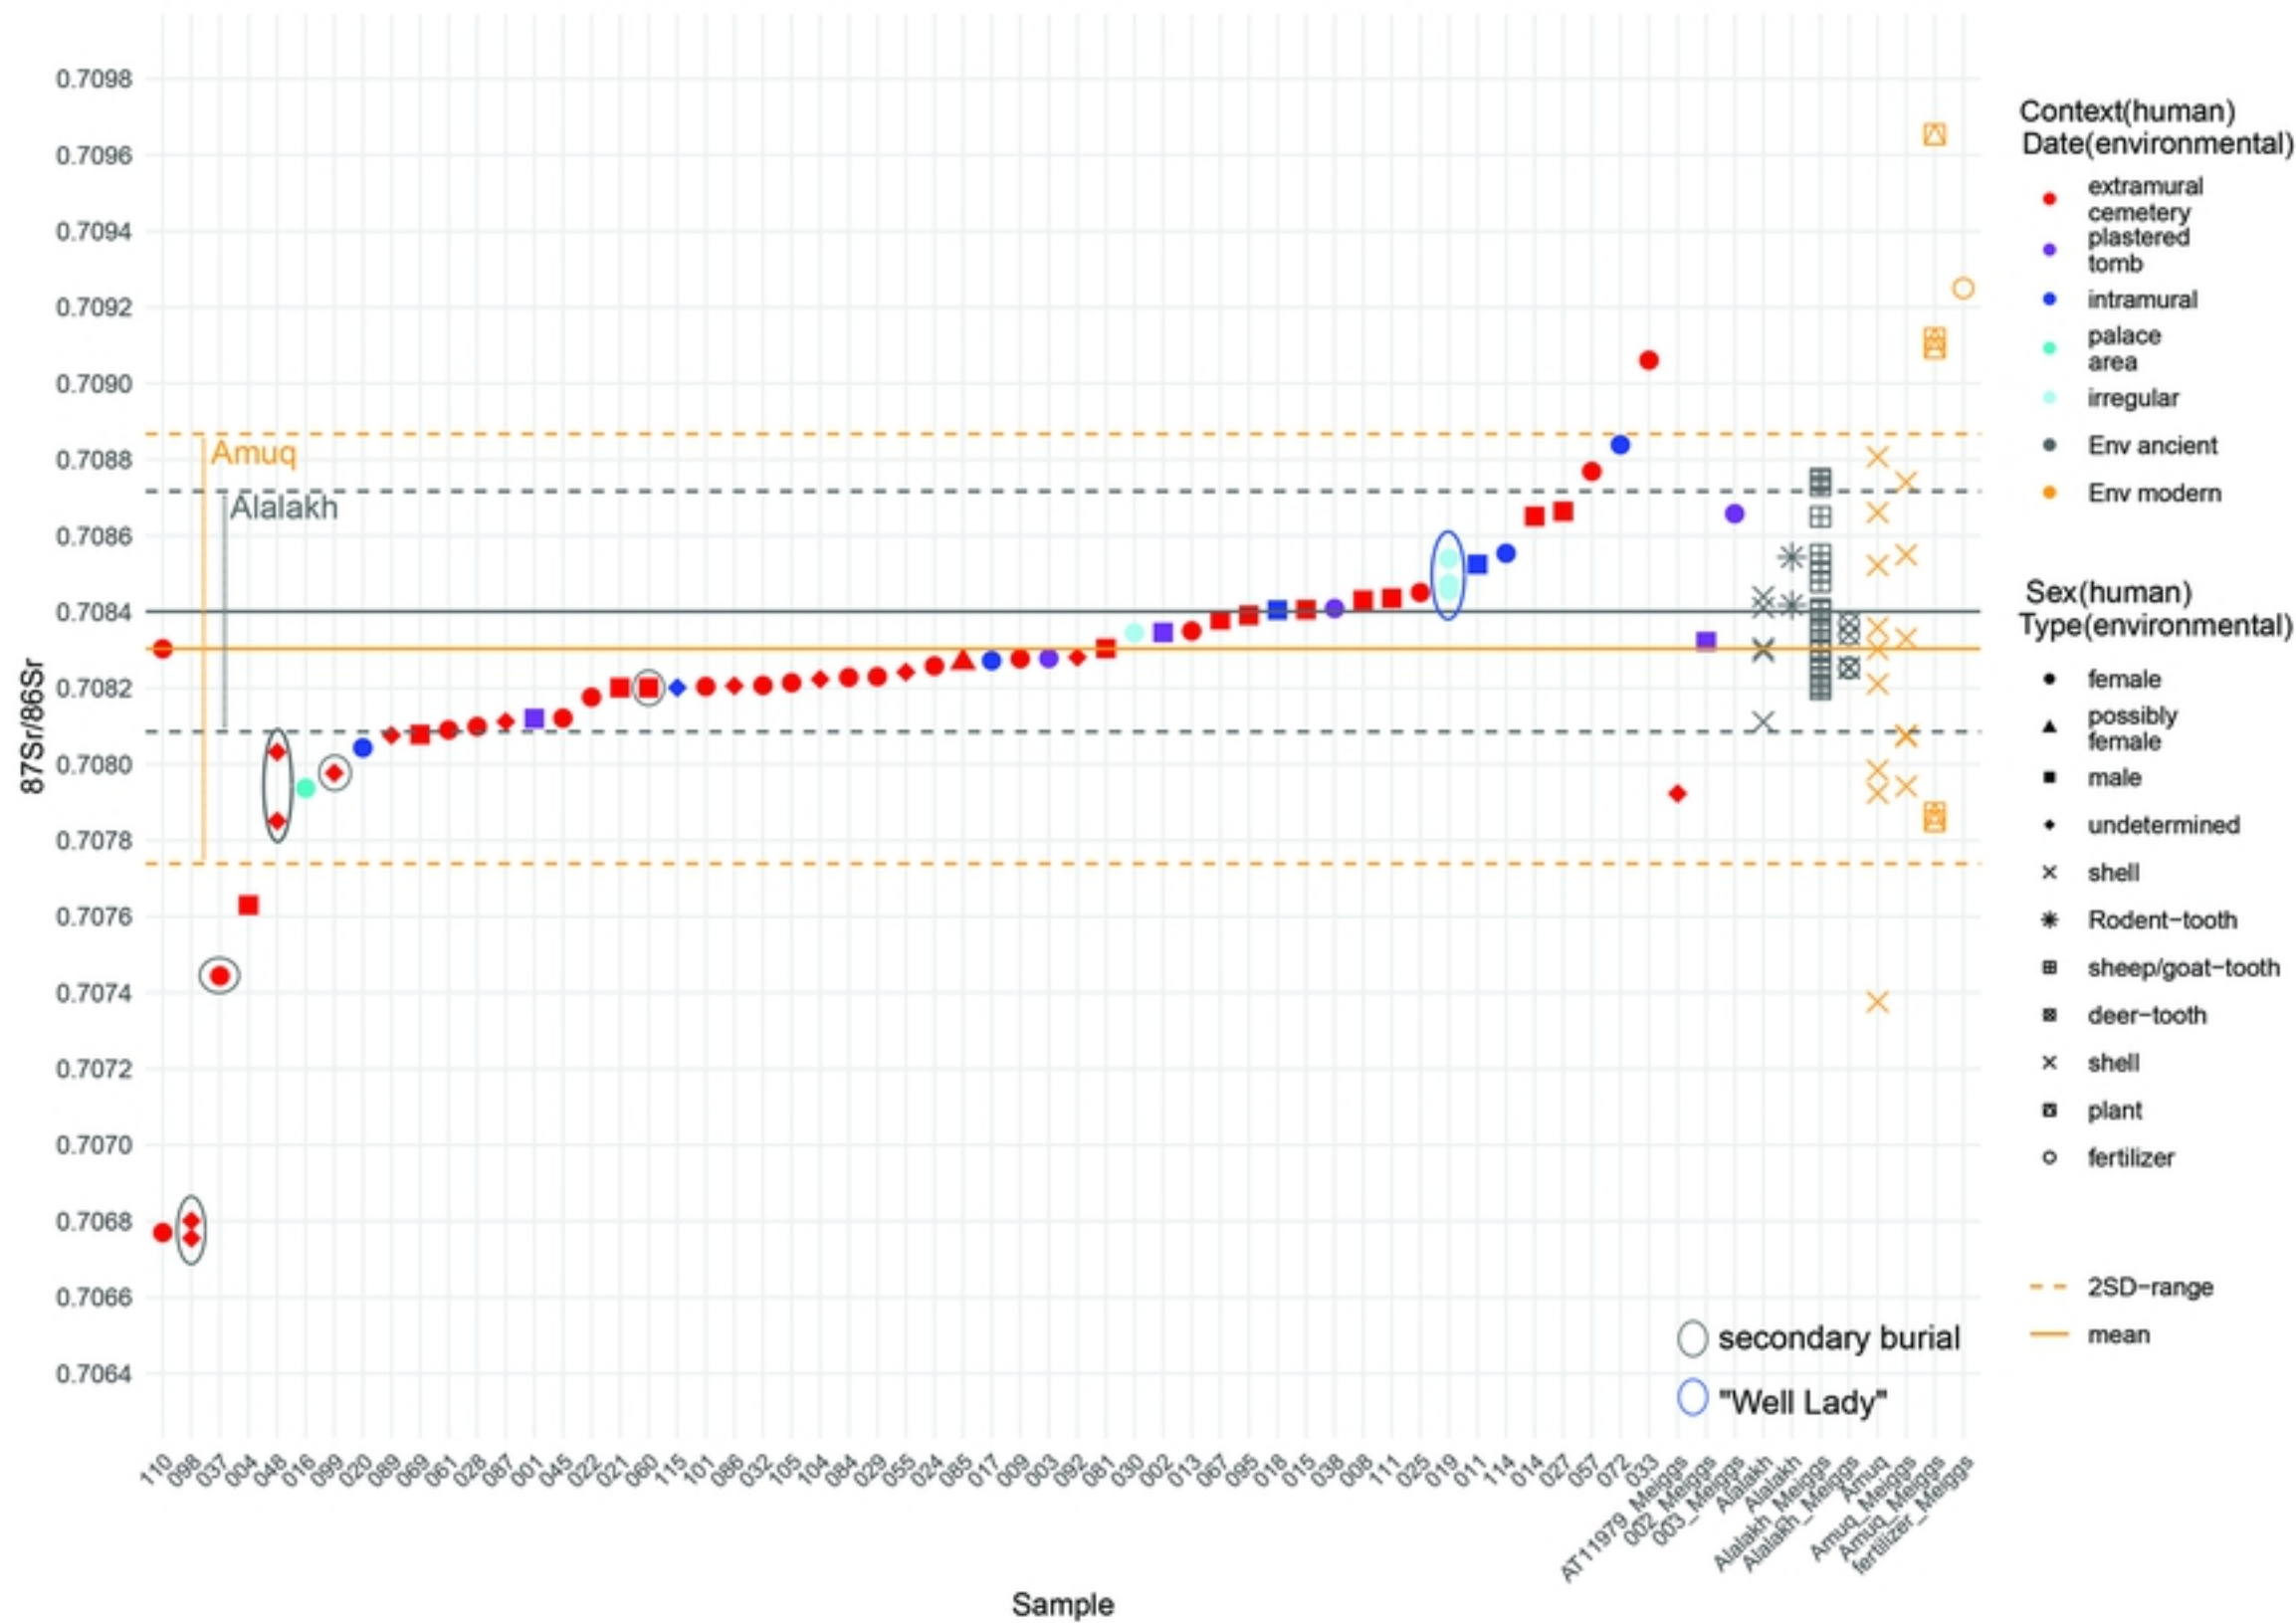

Figure12

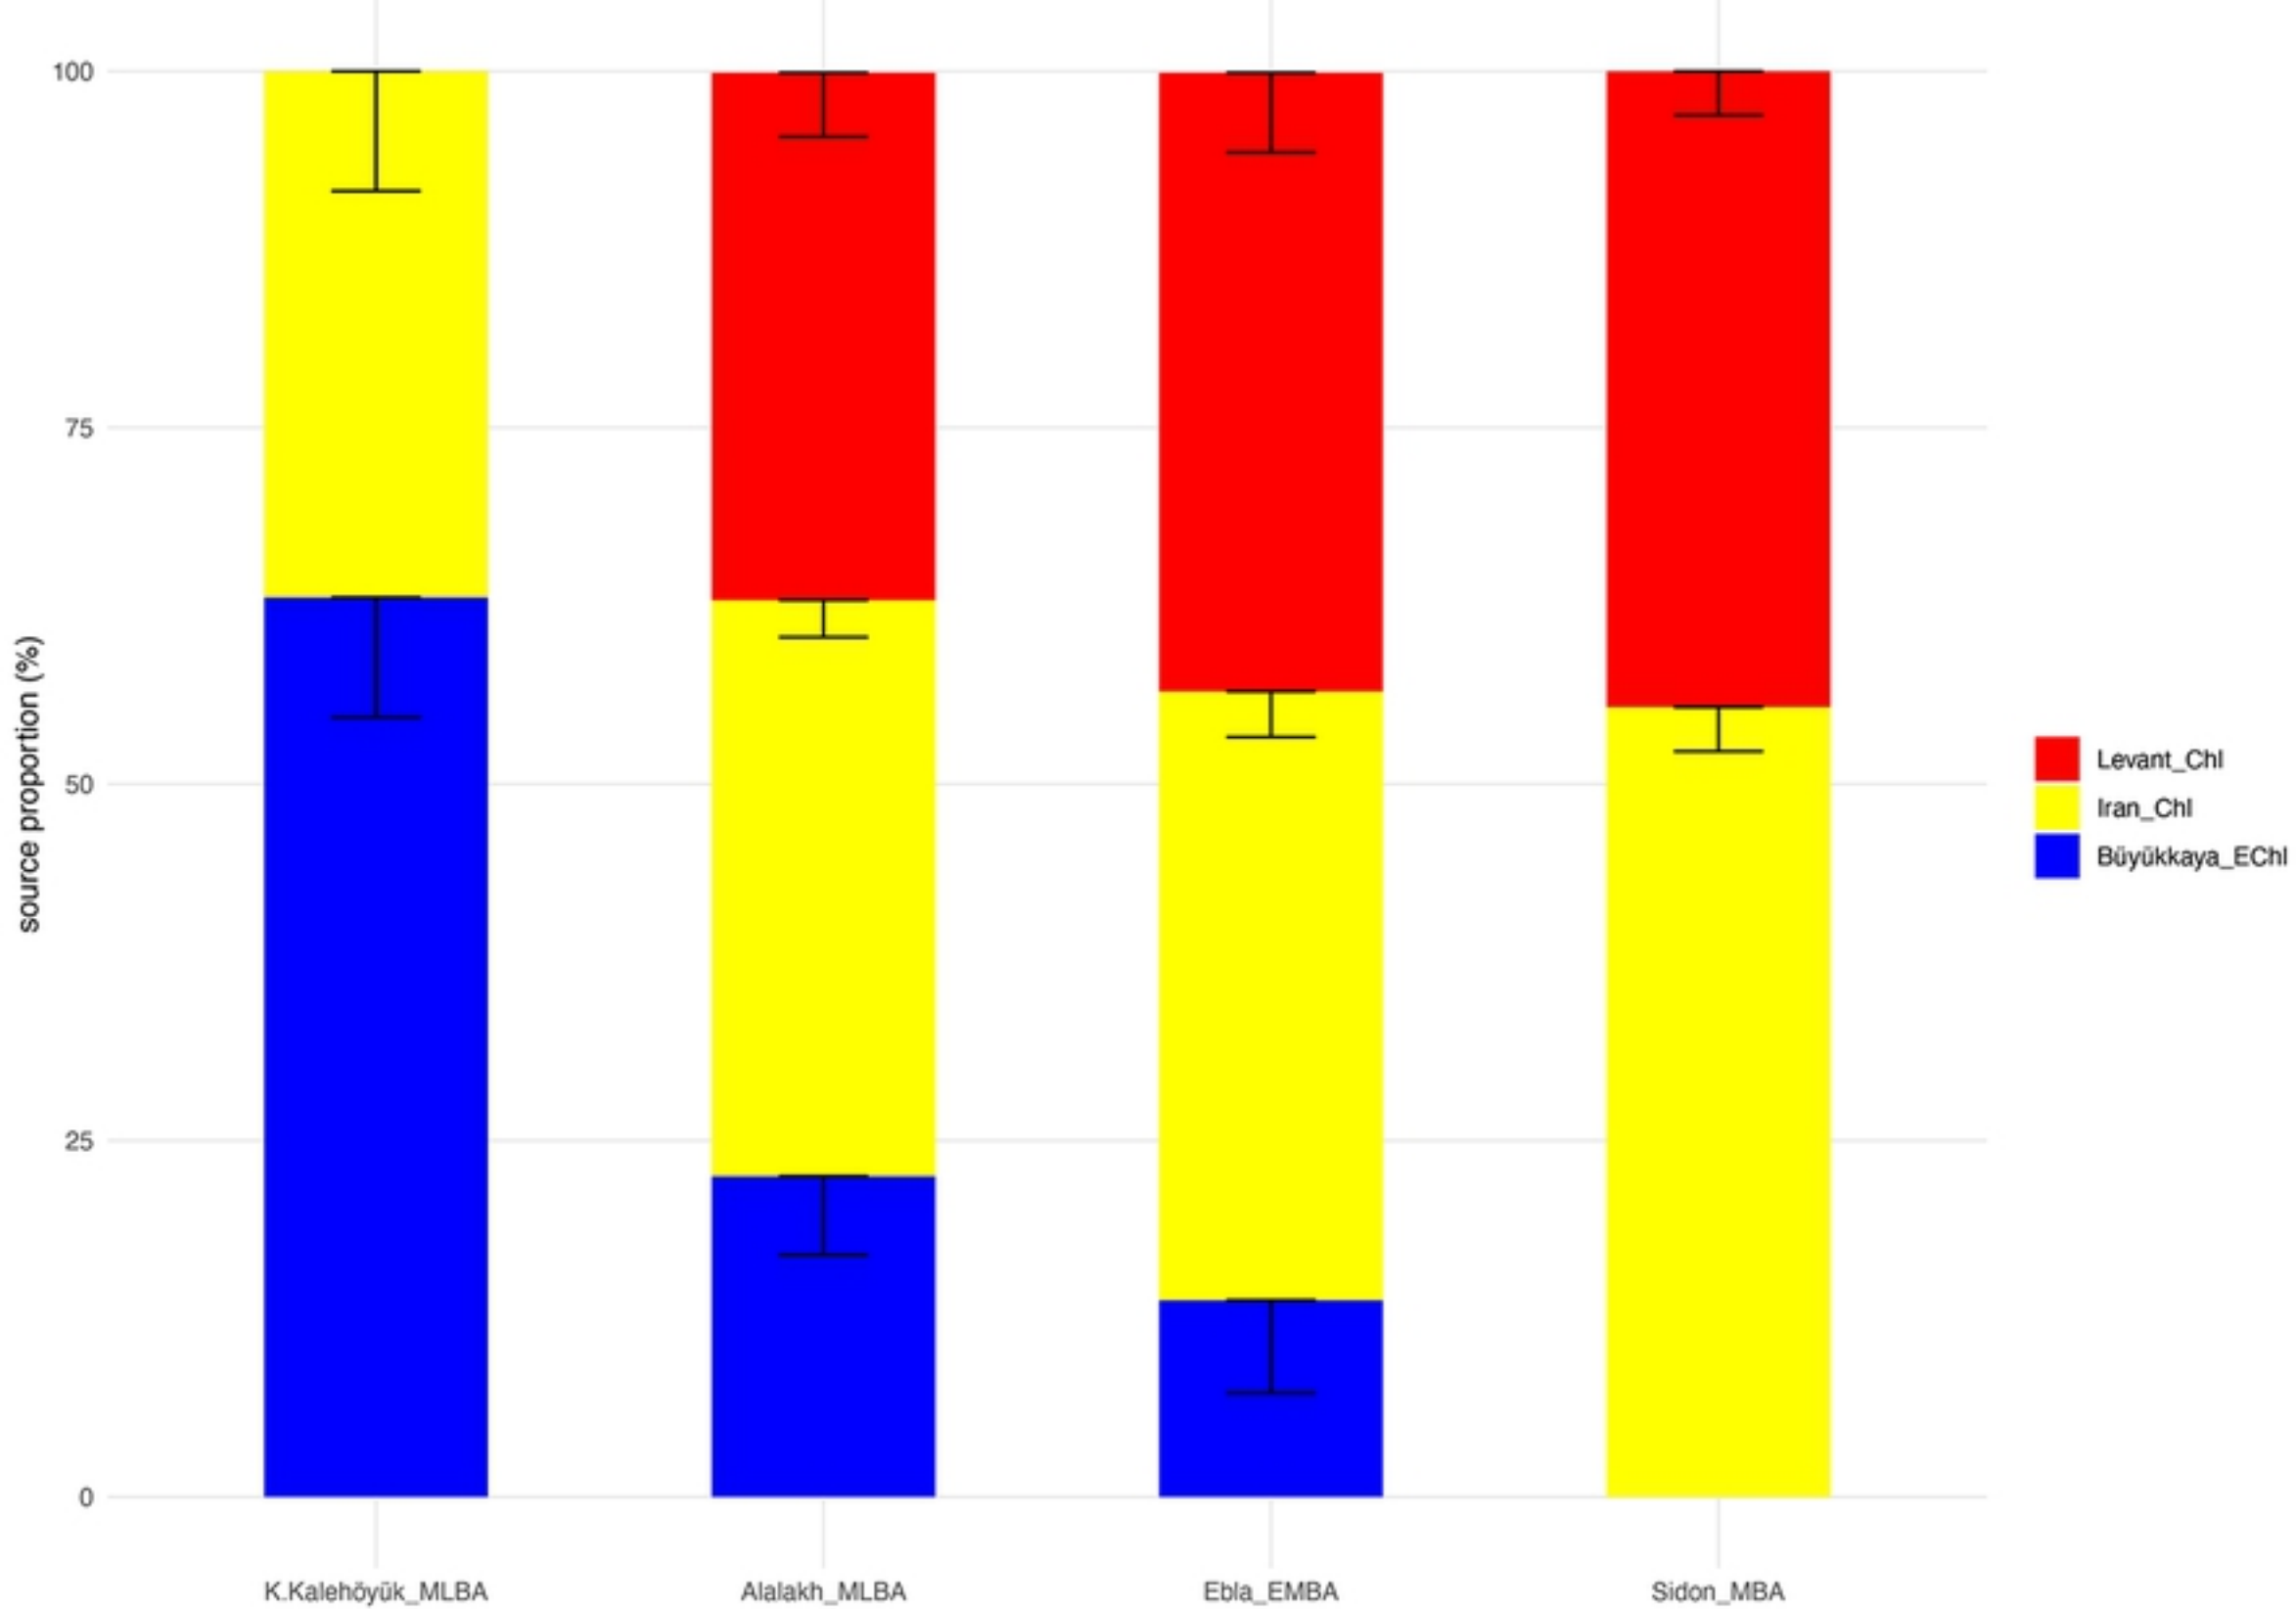

Figure13



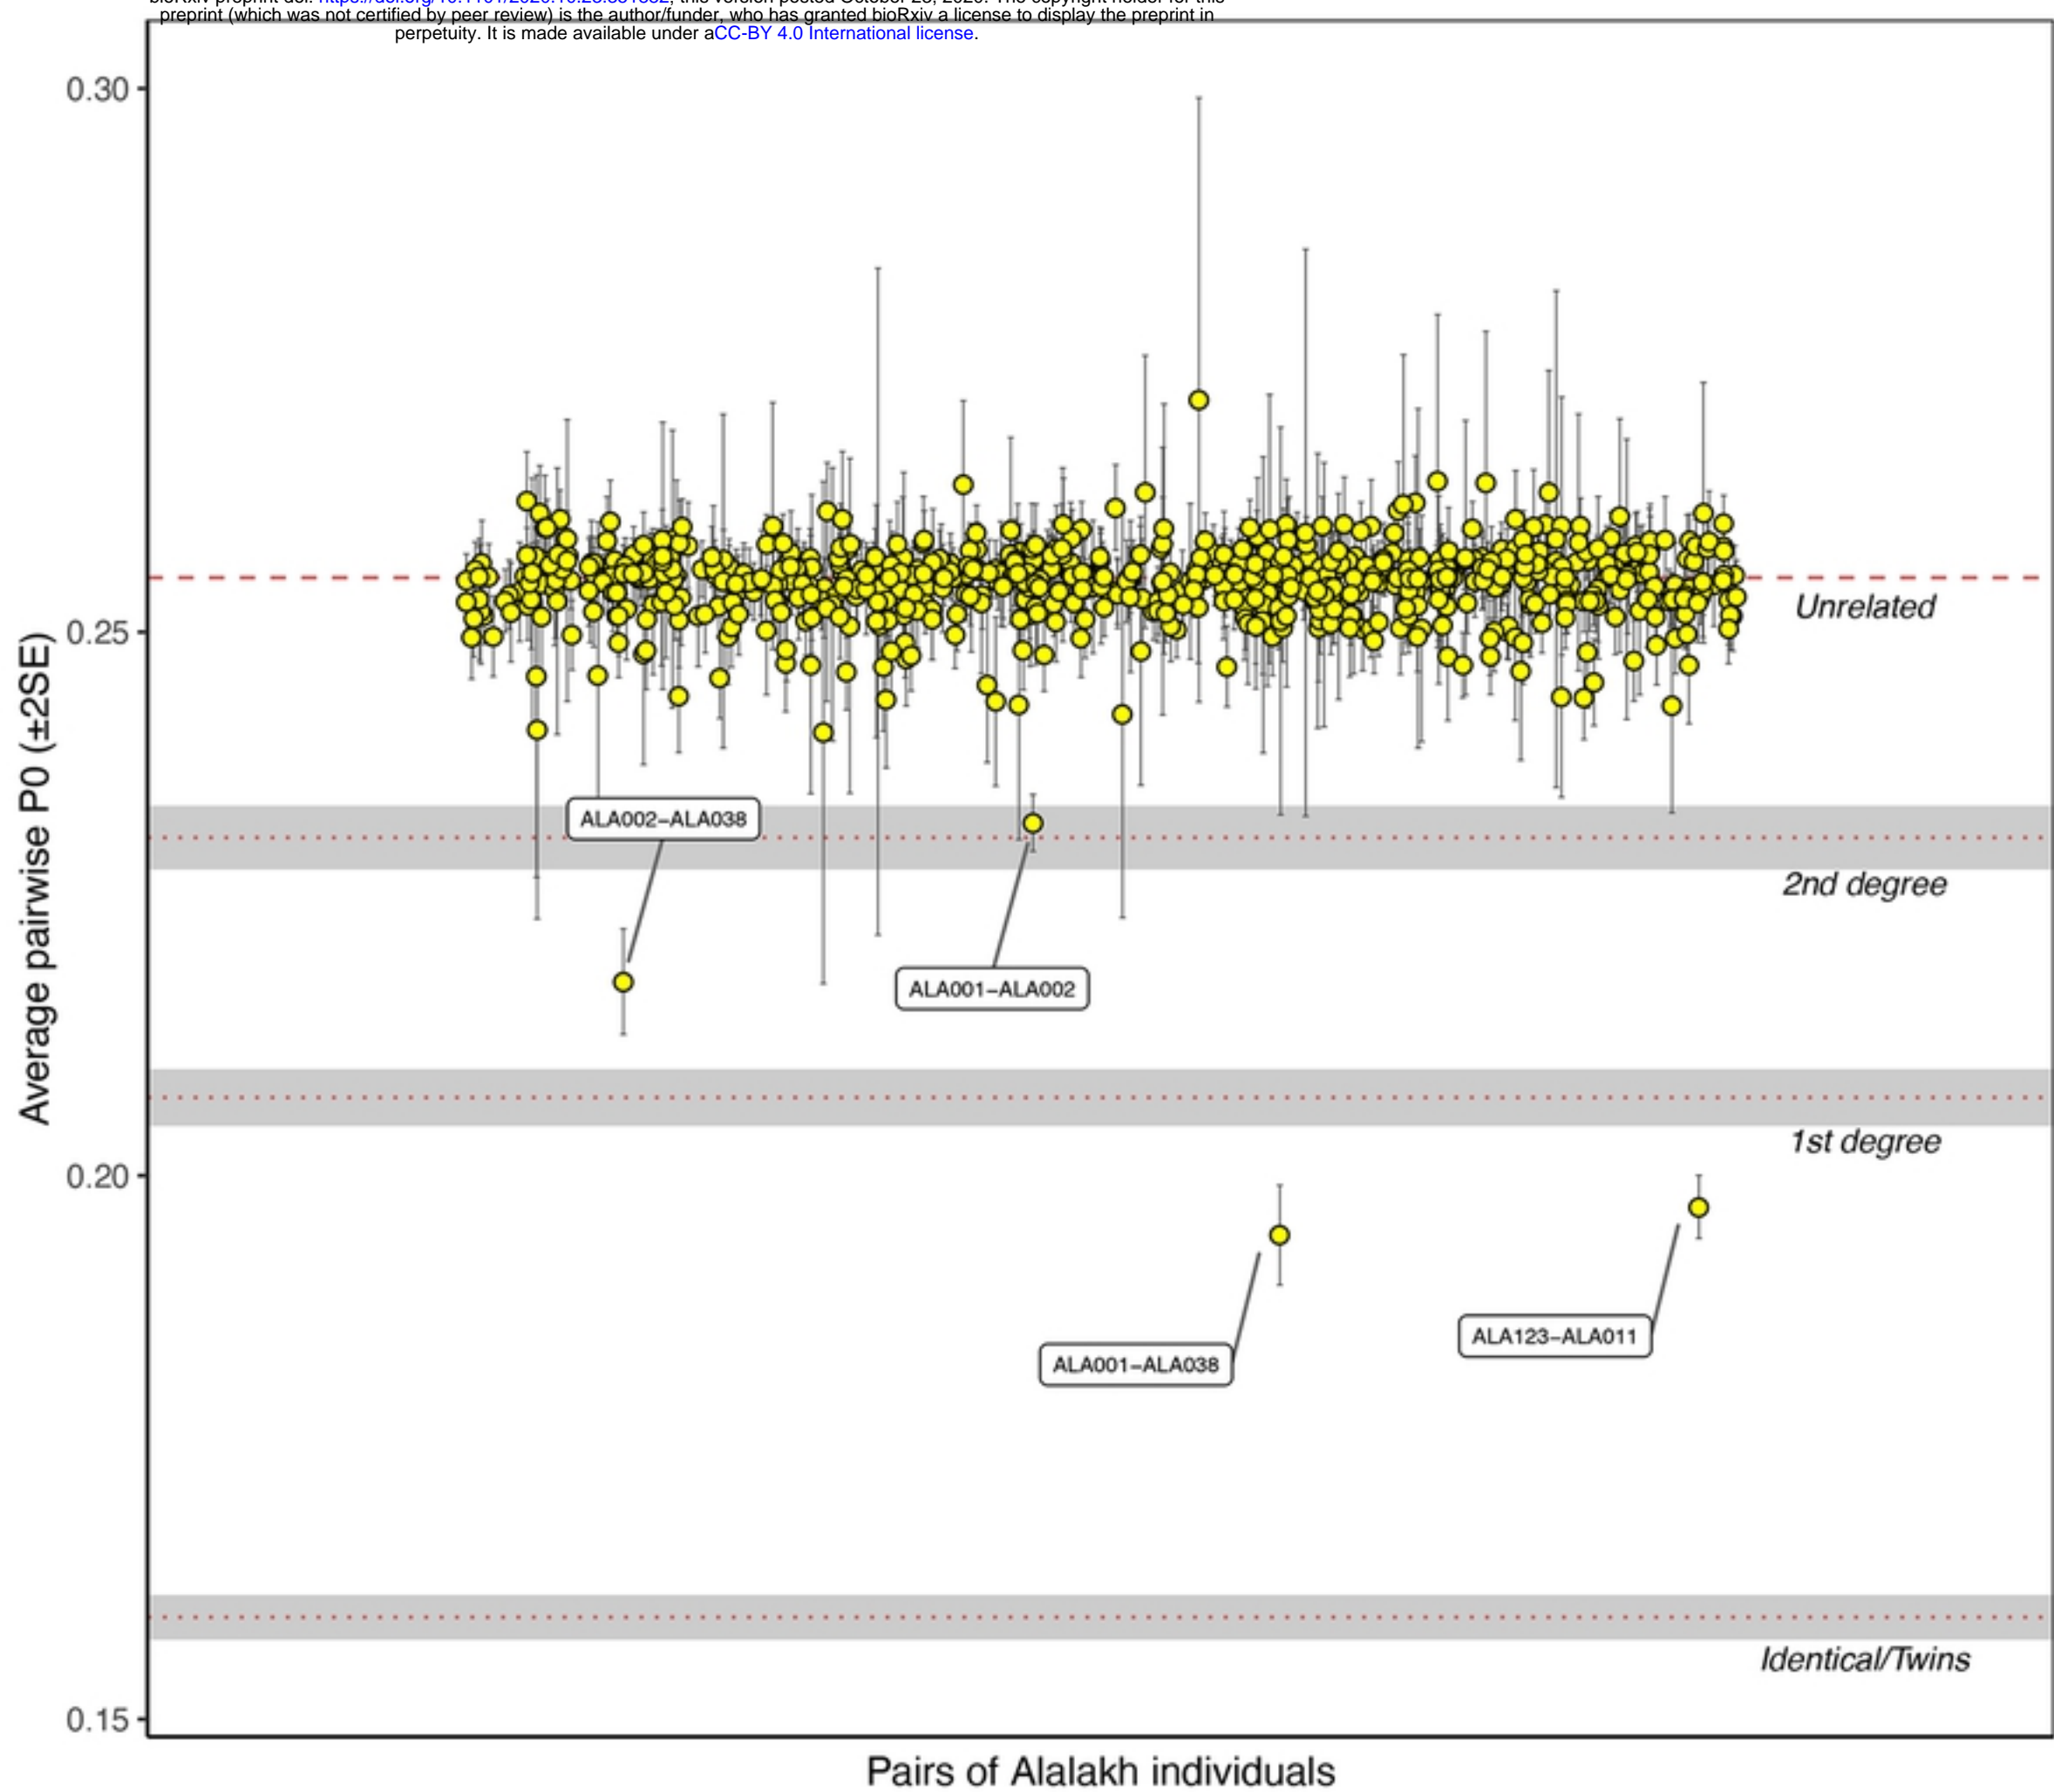

Figure14

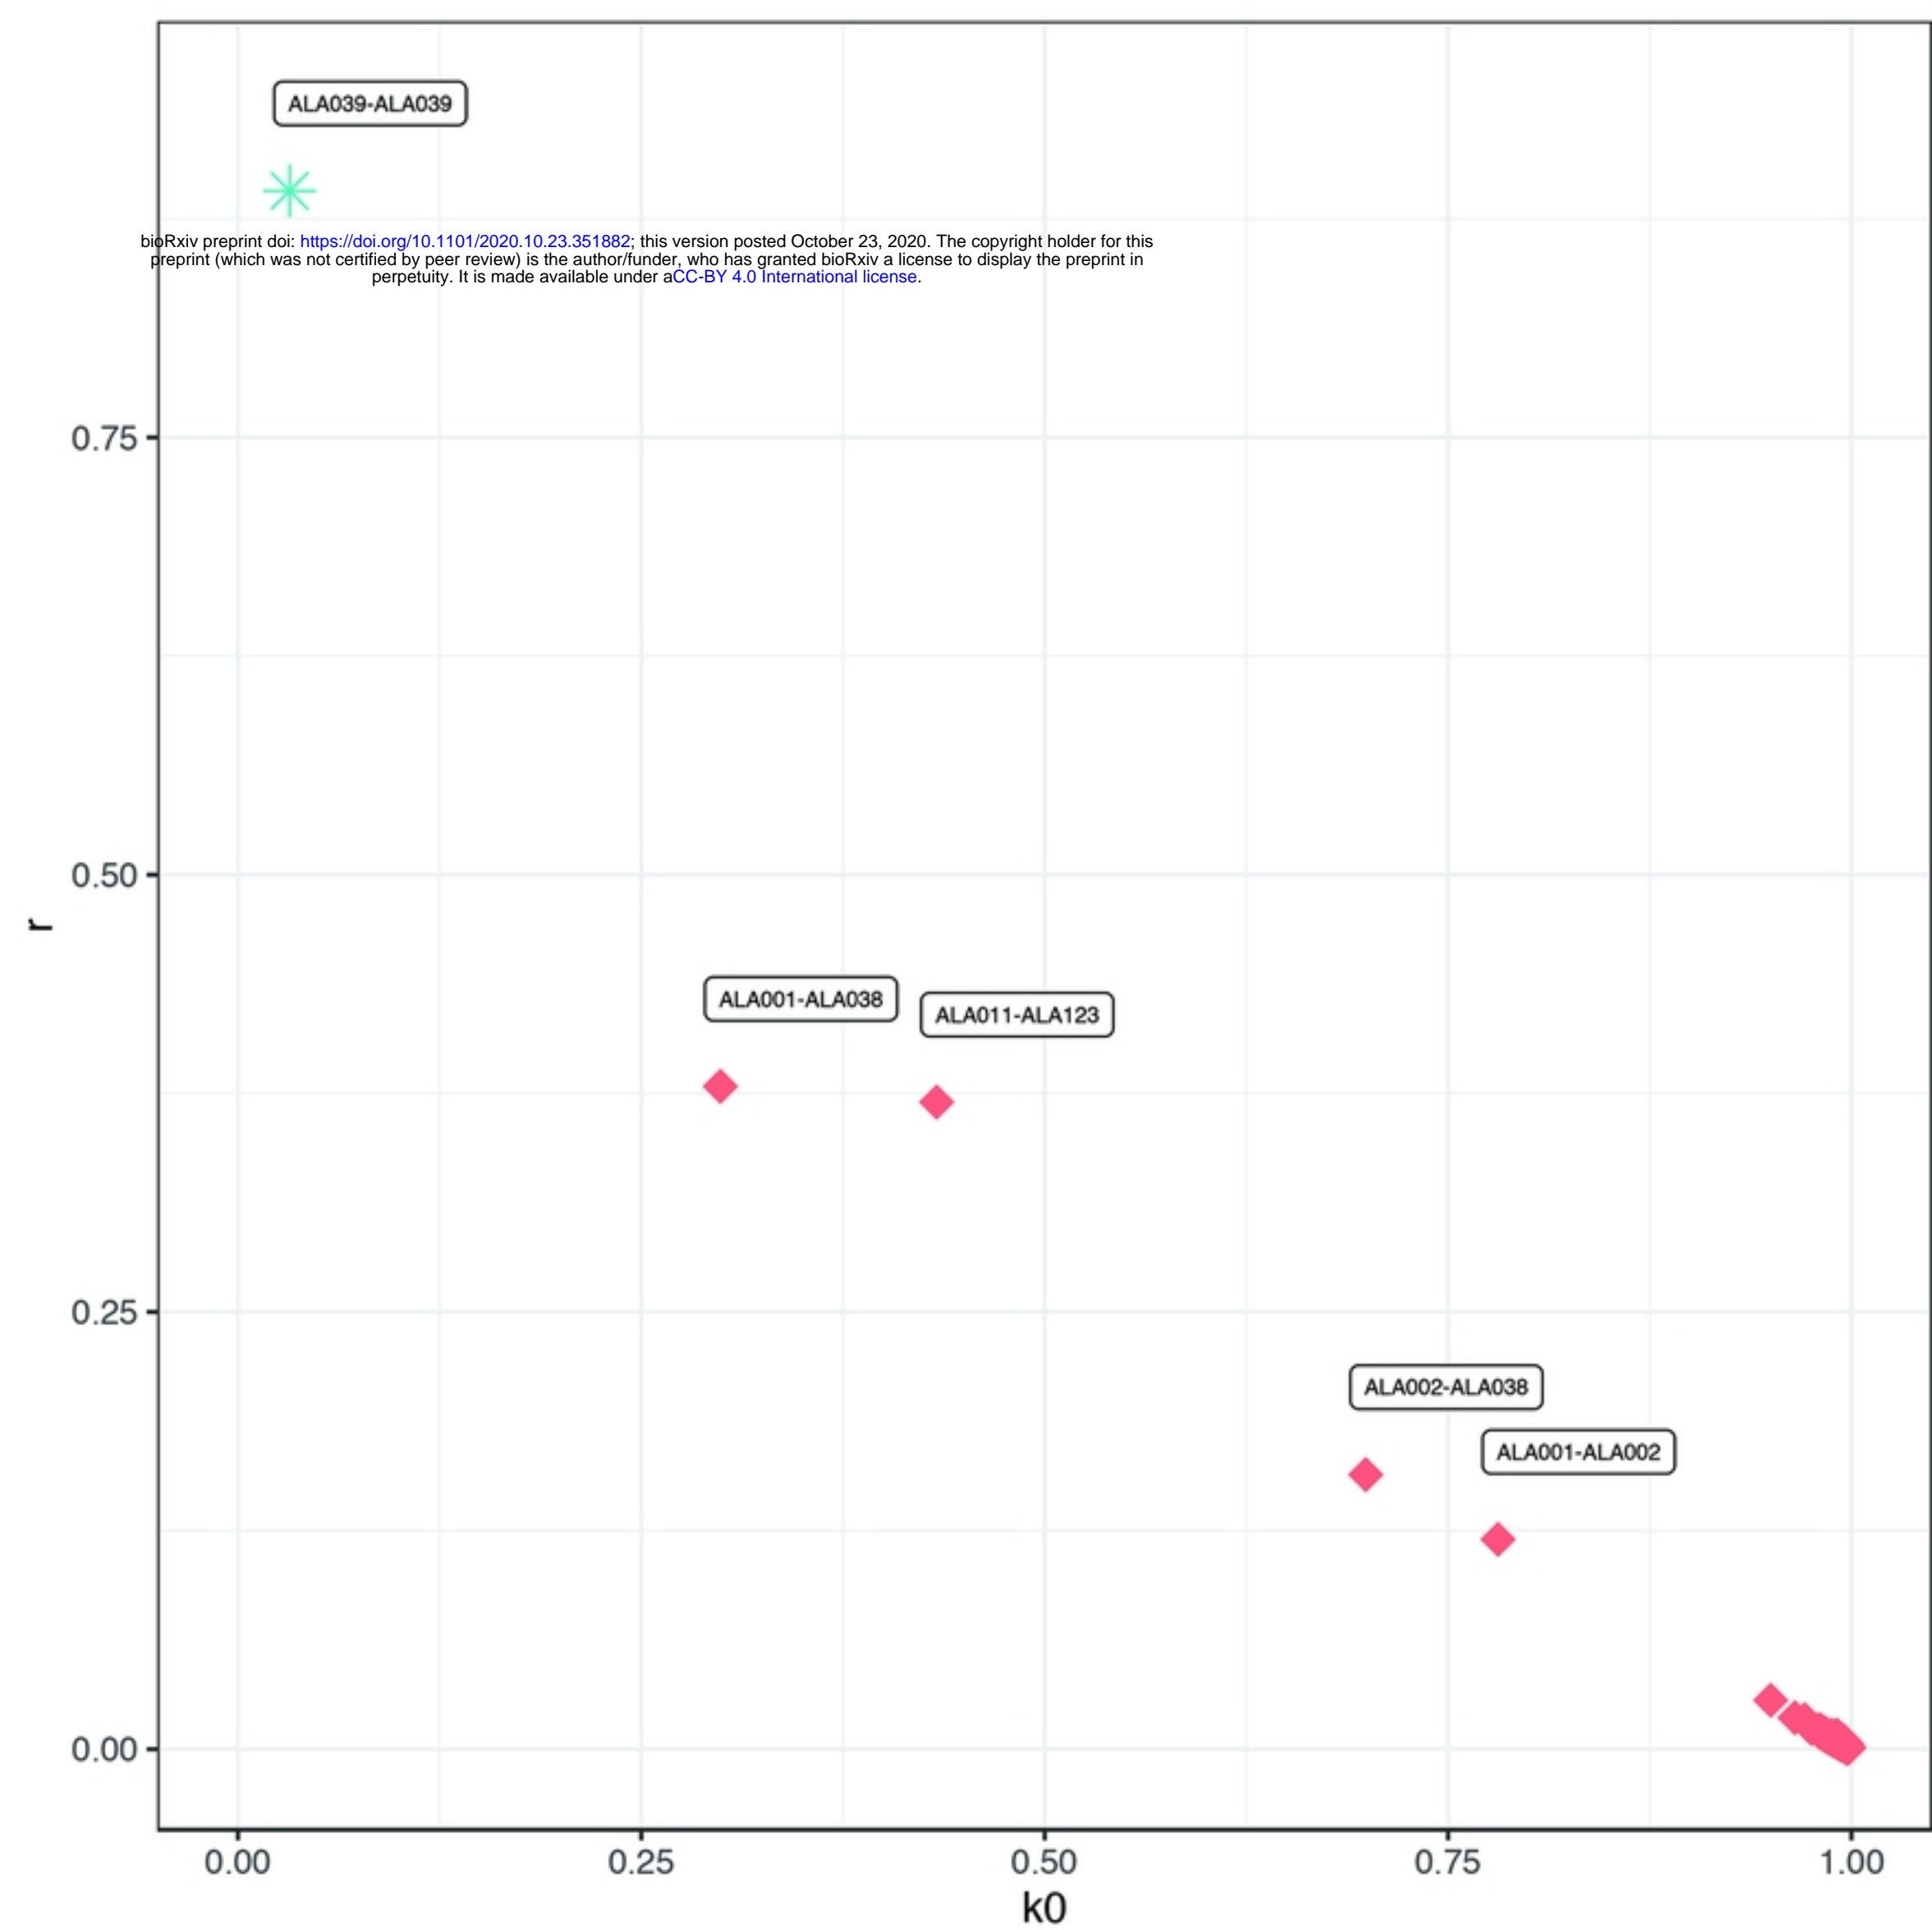

Figure15

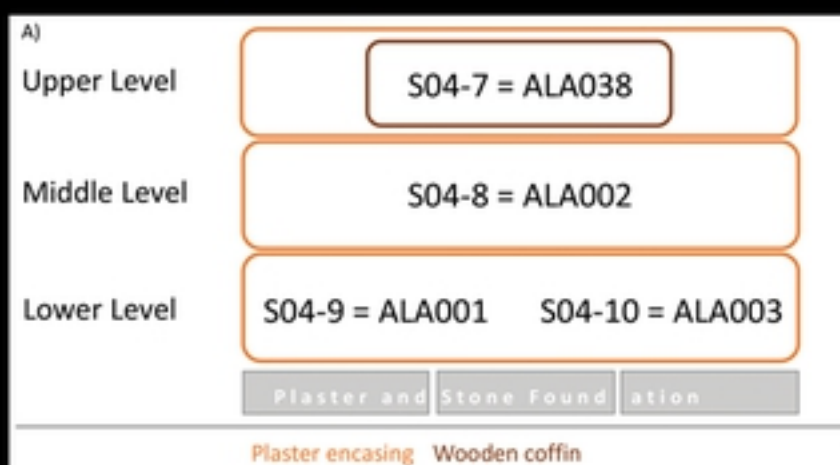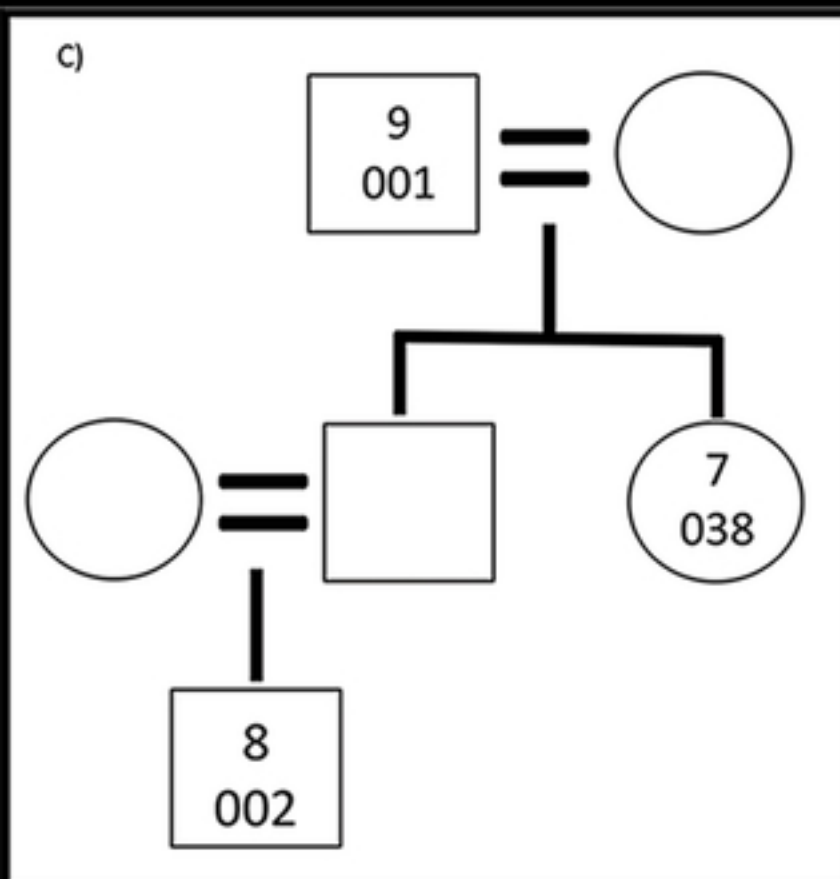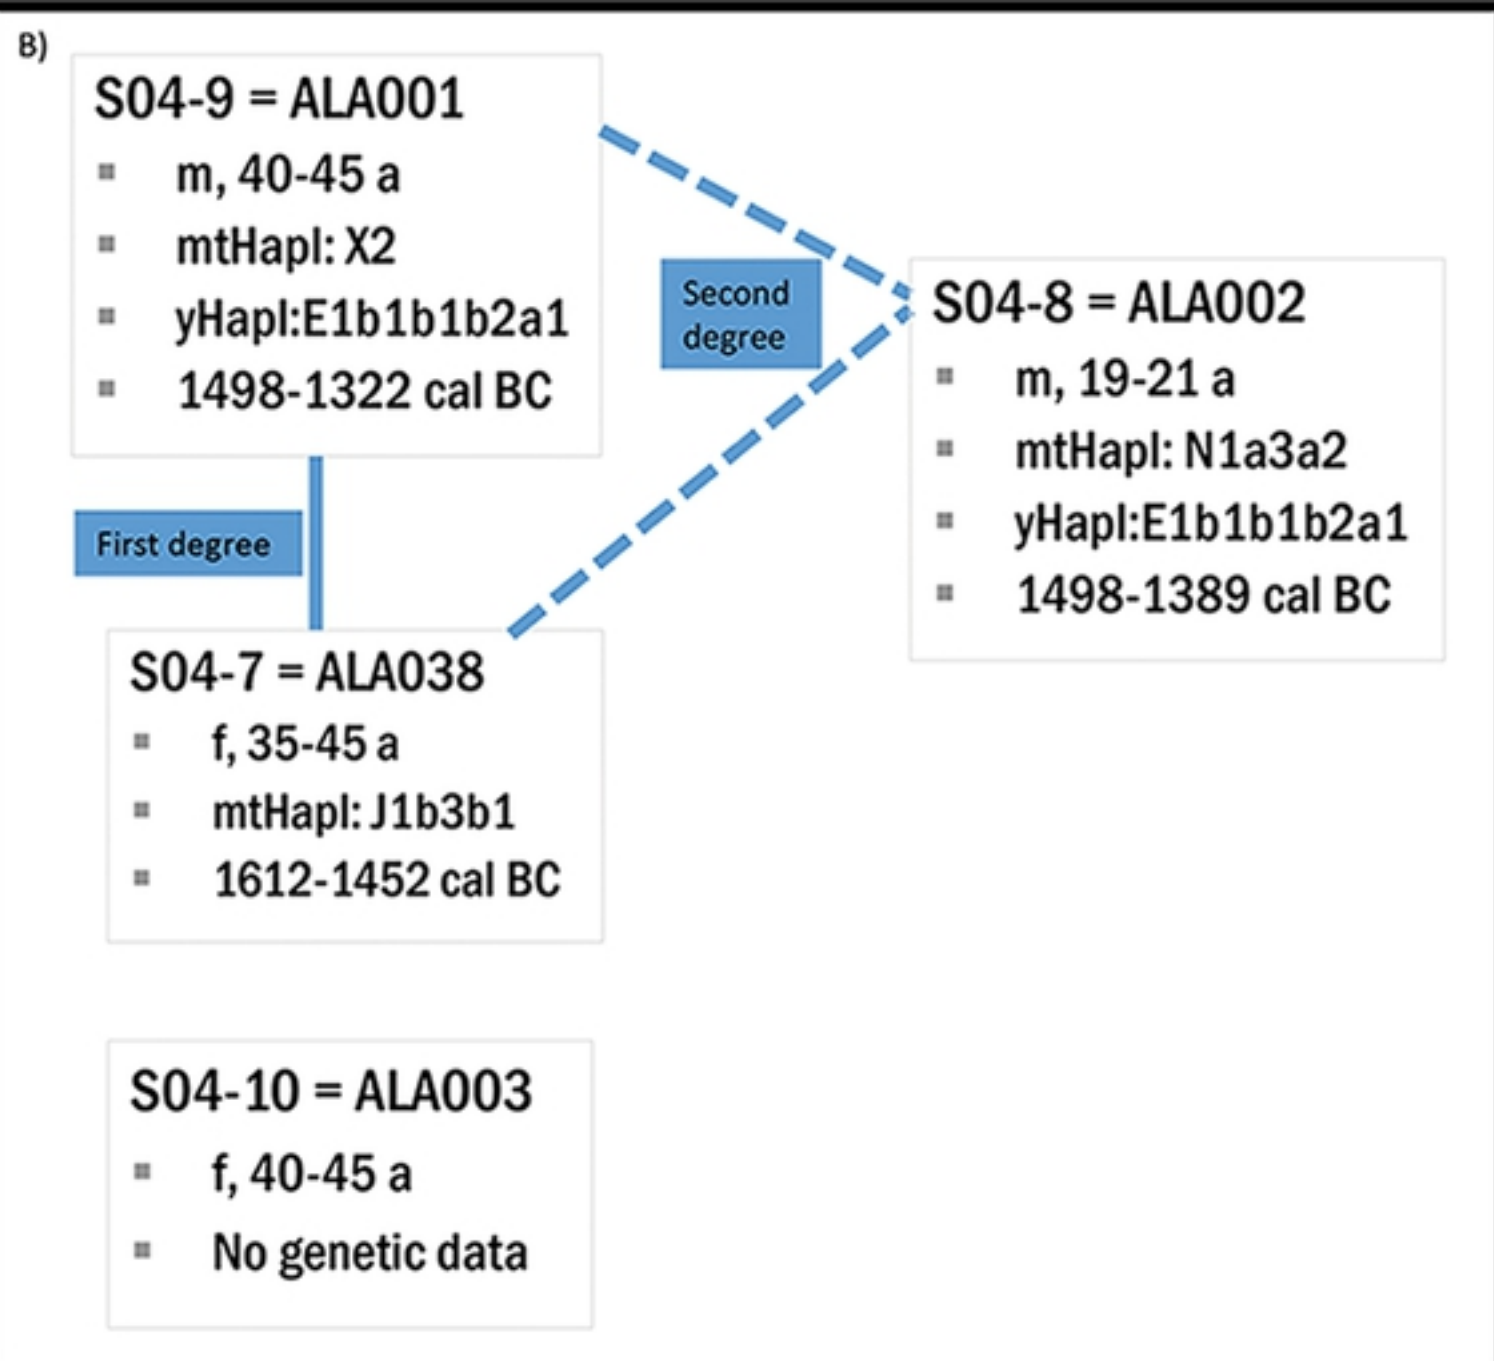

Figure 16
